# Supplementary material for: Metal-free [3+3] benzannulation of 1-indanylidene-malononitrile with Morita–Baylis–Hillman carbonates: direct access to functionalized fluorene and fluorenone derivatives
Source: Royal Society of Chemistry journal article supplement (doi:10.1039/d0cc00143k), 2020-01-01

## Supporting Information

Metal-free [3 + 3] benzannulation of 1-indanylidene-malononitrile with Morita–Baylis–Hillman carbonates: direct access to functionalized fluorene and fluorenone derivatives

Ya-Sa Xie,<sup>a,∇</sup> Run-Feng Huang,<sup>b,∇</sup> Ran Li,<sup>a</sup> Chuan-Bao Zhang,<sup>a</sup> Ji-Ya Fu,<sup>\*a,c</sup> Li-Li Zhao<sup>\*b</sup> and Jin-Fang Yuan<sup>\*a</sup>

AUTHOR ADDRESS.

<sup>a</sup>College of Chemistry and Chemical Engineering, Henan University, Kaifeng, 475004, China.

<sup>b</sup>Institute of Advanced Synthesis, School of Chemistry and Molecular Engineering, Jiangsu National Synergetic Innovation Center for Advanced Materials, Nanjing Tech University, Nanjing, 211816, China.

<sup>c</sup>Institute of Fine Chemistry and Engineering, Henan University, Kaifeng, 475004, China

<sup>∇</sup> This author contributed equally to this work.

---

## Table of Contents

|                                                                                                                                                  |     |
|--------------------------------------------------------------------------------------------------------------------------------------------------|-----|
| 1. General experimental information.....                                                                                                         | S3  |
| 2. Optimization of the reaction conditions.....                                                                                                  | S3  |
| 3. General procedure for the synthesis of compounds <b>3</b> .....                                                                               | S3  |
| 4. General procedure for the synthesis of compounds <b>4</b> .....                                                                               | S3  |
| 5. Procedure for the synthesis of compounds <b>5</b> and <b>6</b> .....                                                                          | S13 |
| 6. Studying the reaction mechanism.....                                                                                                          | S14 |
| 7. X-ray crystal structure of compound <b>3ba</b> .....                                                                                          | S65 |
| 8. The fluorescence properties of compound <b>6</b> .....                                                                                        | S77 |
| 9. <sup>1</sup> H and <sup>13</sup> C NMR spectra for compounds <b>3aa-aq</b> , compounds <b>4aa-ap</b> , compounds <b>5</b> and <b>6</b> . .... | S78 |

## 1. General experimental information

Reactions were monitored by TLC and visualized with ultraviolet light. All reagents were obtained from commercial supplier without further purification. Column chromatography was performed using silica gel (200–300 mesh) eluting with ethyl acetate and petroleum ether. NMR spectra were recorded with tetramethylsilane as the internal standard. <sup>1</sup>H NMR and <sup>13</sup>C NMR spectra of DMSO solutions were recorded either at 400 and 100 MHz or at 300 and 75 MHz (Bruker Avance), respectively and resonances ( $\delta$ ) are given in parts per million relatives to tetramethylsilane. Data are reported as follows: chemical shift, multiplicity (s = singlet, d = doublet, t = triplet, m = multiplet), coupling constants (Hz) and integration. High resolution mass spectra were obtained with the Q-TOF-Premier mass spectrometer. The X-ray crystal-structure determinations of **3ba** were obtained on a Bruker APEX DUO system. All melting points are uncorrected.

## 2. Optimization of the reaction conditions

Table S1. Optimization of the Reaction Conditions<sup>a</sup>

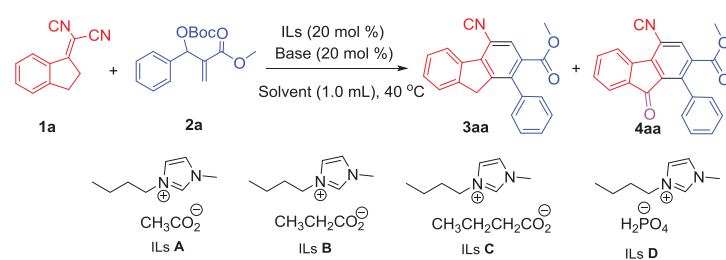

| Entry           | Base              | ILs | Solvent            | Time (h) | Yield (%) <sup>b</sup><br><b>3aa/4aa</b> |
|-----------------|-------------------|-----|--------------------|----------|------------------------------------------|
| 1               | DABCO             | A   | CH <sub>3</sub> CN | 48       | 51 / trace                               |
| 2               | DMAP              | A   | CH <sub>3</sub> CN | 96       | trace / trace                            |
| 3               | DBU               | A   | CH <sub>3</sub> CN | 96       | 16 / trace                               |
| 4               | Et <sub>3</sub> N | A   | CH <sub>3</sub> CN | 96       | 11 / trac                                |
| 5               | PPh <sub>3</sub>  | A   | CH <sub>3</sub> CN | 96       | - / -                                    |
| 6               | -                 | A   | CH <sub>3</sub> CN | 96       | - / -                                    |
| 7               | DABCO             | -   | CH <sub>3</sub> CN | 168      | 18 / trace                               |
| 8               | DABCO             | A   | Toluene            | 48       | 10 / trace                               |
| 9               | DABCO             | A   | CHCl <sub>3</sub>  | 48       | 17 / trace                               |
| 10              | DABCO             | A   | THF                | 48       | 24 / trace                               |
| 11              | DABCO             | A   | DMF                | 2        | 63 / trace                               |
| 12              | DABCO             | A   | DMSO               | 48       | 18 / trace                               |
| 13 <sup>c</sup> | DABCO             | A   | DMF                | 2        | 28 / trace                               |
| 14 <sup>d</sup> | DABCO             | A   | DMF                | 2        | 40 / trace                               |
| 15 <sup>e</sup> | DABCO             | A   | DMF                | 7        | 48 / trace                               |
| 16 <sup>f</sup> | DABCO             | A   | DMF                | 0.5      | 50 / trace                               |

<sup>a</sup> Reaction conditions: **1a** (0.10) mmol, **2a** (0.10 mmol), ILs (20 mol %), catalyst (20 mol %), solvent (1.0 mL), 40 °C, air, sealed tube. <sup>b</sup> Yield of isolated **3aa** after purification by silica gel column chromatography. <sup>c</sup> the mole ratios to 1.5:1.0 (**1a/2a**); <sup>d</sup> the mole ratios to 1.0:1.5 (**1a/2a**); <sup>e</sup> 10 mol % of DABCO and 10 mol % ILs A were used; <sup>f</sup> 40 mol % of DABCO and 40 mol % ILs A were used;

## 3. General experimental procedures for synthesis of compounds 3

A mixture of DABCO (0.02 mmol, 20 mol %), ILs **D** (0.02 mmol, 20 mol %), 1-indanylidene malononitrile **1** (0.10 mmol, 1.0 equiv.) and MBH carbonates **2** (0.10 mmol, 1.0 equiv.) and DMF (1.0 mL) were added to a sealed reaction tube equipped with a stir bar. The tube was then sealed and the resulting mixture was stirred at 60 °C for the time indicated in Scheme 2. Upon completion (monitored by TLC), the reaction solution was concentrated in vacuo. The crude product was purified by column chromatography on silica gel (eluent PE:EtOAc = 30:1) to afford pure products **3**.

#### 4. General experimental procedures for synthesis of compounds **4**

A mixture of catalyst DABCO (0.02 mmol, 20 mol%), ILs **D** (0.02 mmol, 20 mol %), 1-indanylidene malononitrile **1** (0.10 mmol, 1.0 equiv.) and MBH carbonates **2** (0.10 mmol, 1.0 equiv.) and DMF (1.0 mL) were added to a reaction tube equipped with a stir bar. The resulting mixture was stirred at 60 °C under oxygen condition for the time indicated in Scheme 2. Upon completion (monitored by TLC), the reaction solution was concentrated in vacuo. The crude product was purified by column chromatography on silica gel (eluent PE:EtOAc = 20:1) to afford pure products **4**.

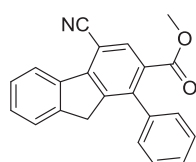

**Methyl 4-cyano-1-phenyl-9H-fluorene-2-carboxylate (3aa).** White solid, 23.7 mg, 73% yield, m.p. 235.7-235.8 °C. <sup>1</sup>H NMR (400 MHz, CDCl<sub>3</sub>) δ 8.45 (d, *J* = 7.6 Hz, 1H), 8.23 (s, 1H), 7.47 – 7.34 (m, 6H), 7.20 (d, *J* = 7.7 Hz, 2H), 3.61 (d, *J* = 13.2 Hz, 5H) ppm. <sup>13</sup>C NMR (100 MHz, CDCl<sub>3</sub>) δ 166.4, 145.6, 144.9, 144.8, 144.0, 138.4, 138.1, 134.2, 129.5, 128.6, 128.3, 127.9, 127.6 (2C), 127.6, 125.0, 123.0, 117.6, 103.2, 52.2, 36.9 ppm. IR (KBr) ν: 707, 768, 807, 906, 980, 1030, 1173, 1197, 1262, 1314, 1377, 1455, 1494, 1734, 2952 cm<sup>-1</sup>. HRMS (ESI) calcd for C<sub>22</sub>H<sub>15</sub>NO<sub>2</sub>Na (M+Na)<sup>+</sup> 348.0995, found 348.0991.

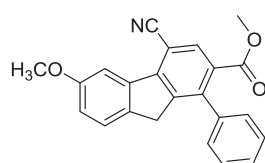

**Methyl 4-cyano-6-methoxy-1-phenyl-9H-fluorene-2-carboxylate (3ba).** Yellow solid, 24.5 mg, 69% yield, m.p. 167.4-168.8 °C. <sup>1</sup>H NMR (400 MHz, CDCl<sub>3</sub>) δ 8.19 (s, 1H), 7.94 (d, *J* = 2.1 Hz, 1H), 7.38 (dd, *J* = 6.6, 4.5 Hz, 3H), 7.30 (d, *J* = 8.4 Hz, 1H), 7.18 (dd, *J* = 7.6, 1.7 Hz, 2H), 6.96 – 6.89 (m, 1H), 3.84 (s, 3H), 3.58 (s, 3H), 3.53 (s, 2H) ppm. <sup>13</sup>C NMR (100 MHz, CDCl<sub>3</sub>) δ 166.5, 159.5, 145.9, 145.7, 144.0, 139.3, 138.4, 137.3, 134.1, 128.6, 128.3, 127.9, 127.8, 125.6, 117.7, 117.4, 106.6, 103.1, 55.6, 52.3, 36.3 ppm. IR (KBr) ν: 703, 801, 859, 1035, 1117, 1221, 1292, 1433, 1731, 2227, 2851, 2923 cm<sup>-1</sup>. HRMS (ESI) calcd for C<sub>23</sub>H<sub>18</sub>NO<sub>3</sub> (M+H)<sup>+</sup> 356.1281, found 356.1276.

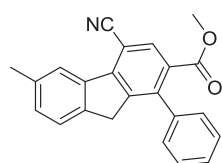

**Methyl 4-cyano-6-methyl-1-phenyl-9H-fluorene-2-carboxylate (3ca).** White solid, 24.1 mg, 71% yield, m.p. 266.4-266.5 °C. <sup>1</sup>H NMR (300 MHz, CDCl<sub>3</sub>) δ 8.27 (d, *J* = 5.6 Hz, 2H), 7.53 – 7.41 (m, 3H), 7.37 (d, *J* = 7.7 Hz, 1H), 7.25 (t, *J* = 5.6 Hz, 3H), 3.64 (d, *J* = 10.8 Hz, 5H), 2.48 (s, 3H) ppm. <sup>13</sup>C NMR (75 MHz, CDCl<sub>3</sub>) δ 166.4, 145.7, 145.2, 144.0, 142.1, 138.4,

138.3, 137.4, 134.2, 130.6, 128.4, 128.3, 127.8, 127.7, 124.6, 123.3, 117.7, 103.0, 77.4, 77.0, 76.6, 52.2, 36.5, 21.6 ppm. IR (KBr)  $\nu$ : 709, 789, 818, 997, 1110, 1164, 1203, 1212, 1292, 1429, 1730, 2227, 2845, 2923  $\text{cm}^{-1}$ . HRMS (ESI) calcd for  $\text{C}_{23}\text{H}_{17}\text{NO}_2\text{Na}$  ( $\text{M}+\text{Na}$ )<sup>+</sup> 362.1151, found 362.1138.

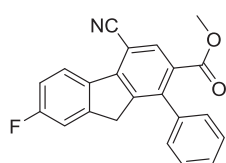

**Methyl 4-cyano-7-fluoro-1-phenyl-9H-fluorene-2-carboxylate (3da).** White solid, 26.8 mg, 78% yield, m.p. 240.8-241.0 °C. <sup>1</sup>H NMR (300 MHz,  $\text{CDCl}_3$ )  $\delta$  8.52 – 8.42 (m, 1H), 8.29 (s, 1H), 7.54 – 7.42 (m, 3H), 7.28 – 7.15 (m, 4H), 3.67 (d,  $J$  = 7.8 Hz, 5H) ppm. <sup>13</sup>C NMR (75 MHz,  $\text{CDCl}_3$ )  $\delta$  166.3, 163.6 (d,  $J$  = 250.4 Hz), 147.4 (d,  $J$  = 9.3 Hz), 144.8, 144.6 (d,  $J$  = 1.9 Hz), 144.0, 138.2, 134.3, 134.2, 128.4, 128.3, 128.0, 127.6, 124.5 (d,  $J$  = 9.4 Hz), 117.5, 115.2 (d,  $J$  = 23.1 Hz), 112.3 (d,  $J$  = 23.1 Hz), 102.9, 52.3, 36.9 ppm. IR (KBr)  $\nu$ : 712, 794, 871, 1022, 1095, 1133, 1209, 1231, 1293, 1334, 1388, 1433, 1482, 1590, 1716, 2230, 1847, 2924  $\text{cm}^{-1}$ . HRMS (ESI) calcd for  $\text{C}_{22}\text{H}_{15}\text{FNO}_2$  ( $\text{M}+\text{H}$ )<sup>+</sup> 344.1081, found 344.1082.

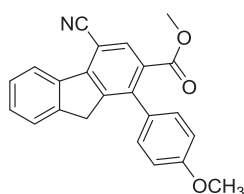

**Methyl 4-cyano-1-(4-methoxyphenyl)-9H-fluorene-2-carboxylate (3ab).** White solid, 30.6 mg, 86% yield, m.p. 177.2-178.0 °C. <sup>1</sup>H NMR (400 MHz,  $\text{CDCl}_3$ )  $\delta$  8.51 (d,  $J$  = 7.6 Hz, 1H), 8.25 (s, 1H), 7.46 (ddt,  $J$  = 8.1, 7.2, 3.9 Hz, 3H), 7.21 (d,  $J$  = 8.6 Hz, 2H), 7.02 (t,  $J$  = 5.6 Hz, 2H), 3.89 (s, 3H), 3.71 (d,  $J$  = 10.3 Hz, 5H) ppm. <sup>13</sup>C NMR (101 MHz,  $\text{CDCl}_3$ )  $\delta$  166.7, 159.3, 145.5, 145.2, 144.9, 143.8, 138.3, 134.1, 130.5, 129.4, 129.0, 128.9, 127.6, 125.0, 123.0, 117.7, 113.8, 103.0, 55.2, 52.3, 37.0 ppm. IR (KBr)  $\nu$ : 753, 911, 968, 1134, 1164, 1203, 1232, 1283, 1433, 1565, 1293, 1736, 2231, 2849, 2918  $\text{cm}^{-1}$ . HRMS (ESI) calcd for  $\text{C}_{23}\text{H}_{18}\text{NO}_3$  ( $\text{M}+\text{H}$ )<sup>+</sup> 356.1281, found 356.1285.

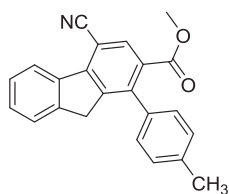

**Methyl 4-cyano-1-p-tolyl-9H-fluorene-2-carboxylate (3ac).** White solid, 23.1 mg, 68% yield, m.p. 258.1-258.9 °C. <sup>1</sup>H NMR (400 MHz,  $\text{CDCl}_3$ )  $\delta$  8.51 (d,  $J$  = 7.6 Hz, 1H), 8.28 (s, 1H), 7.54 – 7.42 (m, 3H), 7.29 (d,  $J$  = 7.8 Hz, 2H), 7.16 (d,  $J$  = 7.8 Hz, 2H), 3.70 (d,  $J$  = 5.3 Hz, 5H), 2.45 (s, 3H) ppm. <sup>13</sup>C NMR (101 MHz,  $\text{CDCl}_3$ )  $\delta$  165.5, 144.6, 144.0, 143.9, 143.2, 137.2, 136.7, 134.3, 133.1, 128.5, 128.1, 127.7, 126.6, 126.6, 124.0, 122.0, 116.7, 102.1, 51.3, 36.0, 20.4 ppm. IR (KBr)  $\nu$ : 745, 778, 998, 1126, 1202, 1291, 1432, 1453, 1733, 2228, 2949  $\text{cm}^{-1}$ . HRMS (ESI) calcd for  $\text{C}_{23}\text{H}_{17}\text{NO}_2\text{Na}$  ( $\text{M}+\text{Na}$ )<sup>+</sup> 362.1151, found 362.1142.

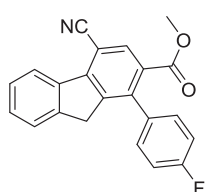

**Methyl 4-cyano-1-(4-fluorophenyl)-9H-fluorene-2-carboxylate (3ad).** White solid, 23.7 mg, 69% yield, m.p. 282.7-283.5 °C. <sup>1</sup>H NMR (300 MHz,  $\text{CDCl}_3$ )  $\delta$  8.49 (d,  $J$  = 7.1 Hz, 1H), 8.29 (s, 1H), 7.54 – 7.41 (m, 3H), 7.28 – 7.14 (m, 4H), 3.69 (d,  $J$  = 8.7 Hz, 5H) ppm. <sup>13</sup>C NMR (75 MHz,  $\text{CDCl}_3$ )  $\delta$  166.2, 162.4 (d,  $J$  = 247.5 Hz), 145.8, 145.0, 144.8, 143.1, 138.0, 134.3, 134.2 (d,  $J$  = 3.6 Hz), 129.6, 129.4 (d,  $J$  = 8.1 Hz), 128.4, 127.6, 125.0, 123.0, 117.5, 115.5 (d,  $J$  = 21.7 Hz), 103.4, 52.3, 36.9 ppm. IR (KBr)  $\nu$ : 751, 778, 860, 1007, 1132, 1169, 1120, 1129, 1435, 1456, 1523, 1614, 1730, 2228, 2921, 2950  $\text{cm}^{-1}$ . HRMS (ESI) calcd for  $\text{C}_{22}\text{H}_{14}\text{FNO}_2\text{Na}$  ( $\text{M}+\text{Na}$ )<sup>+</sup> 366.0901, found 366.0897.

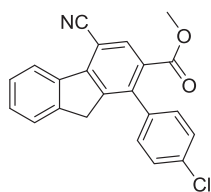

**Methyl 1-(4-chlorophenyl)-4-cyano-9H-fluorene-2-carboxylate (3ae).**

White solid, 63% yield (22.7 mg), m.p. 283.8-284.2 °C. <sup>1</sup>H NMR (400 MHz, CDCl<sub>3</sub>) δ 8.51 (d, *J* = 7.6 Hz, 1H), 8.32 (s, 1H), 7.54 – 7.44 (m, 5H), 7.21 (d, *J* = 8.2 Hz, 2H), 3.71 (s, 3H), 3.67 (s, 2H) ppm. <sup>13</sup>C NMR (75 MHz, CDCl<sub>3</sub>) δ 166.0, 145.9, 144.9, 144.8, 142.9, 137.9, 136.8, 134.4, 134.0, 129.7, 129.1, 128.6, 128.1, 127.7, 125.0, 123.0, 117.4, 103.5, 52.4, 36.8 ppm. IR (KBr) ν: 787, 857, 969, 1046, 1090, 1140, 1438, 1514, 1722, 2225, 2850, 2930 cm<sup>-1</sup>. HRMS (ESI) calcd for C<sub>22</sub>H<sub>15</sub>ClNO<sub>2</sub> (M+H)<sup>+</sup> 360.0786, found 360.0784.

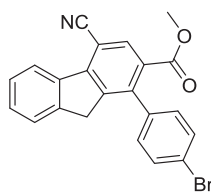

**Methyl 1-(4-bromophenyl)-4-cyano-9H-fluorene-2-carboxylate (3af).**

White solid, 29.9 mg, 74% yield, m.p. 264.1-264.3 °C. <sup>1</sup>H NMR (400 MHz, CDCl<sub>3</sub>) δ 8.51 (d, *J* = 7.5 Hz, 1H), 8.31 (s, 1H), 7.62 (d, *J* = 8.1 Hz, 2H), 7.55 – 7.42 (m, 3H), 7.15 (d, *J* = 8.1 Hz, 2H), 3.71 (s, 3H), 3.66 (s, 2H) ppm. <sup>13</sup>C NMR (75 MHz, CDCl<sub>3</sub>) δ 166.0, 145.9, 144.8 (2C), 142.9, 138.0, 137.3, 134.4, 131.6, 129.7, 129.4, 128.1, 127.7, 125.0, 123.1, 122.2, 117.5, 103.6, 52.4, 36.9 ppm. IR (KBr) ν: 745, 780, 854, 901, 1001, 1022, 1131, 1205, 1291, 1429, 1494, 1733, 2228, 2954 cm<sup>-1</sup>. HRMS (ESI) calcd for C<sub>22</sub>H<sub>15</sub>BrNO<sub>2</sub> (M+H)<sup>+</sup> 404.0281, found 404.0286.

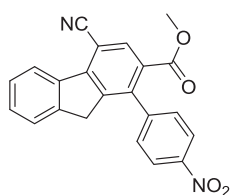

**Methyl 4-cyano-1-(4-nitrophenyl)-9H-fluorene-2-carboxylate (3ag).**

White solid, 19.3 mg, 52% yield, m.p. 240.1-241.0 °C. <sup>1</sup>H NMR (400 MHz, CDCl<sub>3</sub>) δ 8.52 (d, *J* = 7.5 Hz, 1H), 8.38 (t, 3H), 7.56 – 7.43 (m, 5H), 3.73 (s, 3H), 3.63 (s, 2H). <sup>13</sup>C NMR (75 MHz, CDCl<sub>3</sub>) δ 165.4, 147.4, 146.4, 145.6, 144.6, 144.4, 142.0, 137.7, 134.7, 130.0, 128.8, 127.9, 127.3, 125.1, 123.7, 123.2, 117.2, 104.2, 52.5, 36.7. IR (KBr) ν: 751, 857, 910, 978, 1205, 1229, 1273, 1353, 1435, 1520, 1559, 1606, 1712, 2232, 2916, 2954, 3086 cm<sup>-1</sup>. HRMS (ESI) calcd for C<sub>22</sub>H<sub>15</sub>N<sub>2</sub>O<sub>4</sub> (M+H)<sup>+</sup> 371.1026, found 371.1021.

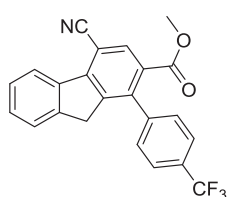

**Methyl**

**4-cyano-1-(4-(trifluoromethyl)phenyl)-9H-fluorene-2-carboxylate (3ah).**

White solid, 23.2 mg, 59% yield, m.p. 209.1-210.3 °C. <sup>1</sup>H NMR (300 MHz, CDCl<sub>3</sub>) δ 8.52 (d, *J* = 7.5 Hz, 1H), 8.37 (s, 1H), 7.76 (d, *J* = 8.0 Hz, 2H), 7.57 – 7.46 (m, 3H), 7.40 (d, *J* = 8.0 Hz, 2H), 3.71 (s, 3H), 3.64 (s, 2H) ppm. IR (KBr) ν: 745, 779, 859, 1007, 1067, 1129, 1161, 1202, 1295, 1330, 1437, 1741, 2230, 2924, 2959 cm<sup>-1</sup>. HRMS (ESI) m/z calcd for C<sub>23</sub>H<sub>14</sub>F<sub>3</sub>NO<sub>2</sub>Na (M+Na)<sup>+</sup> 416.0869, found 416.0869.

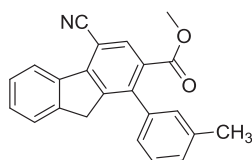

**Methyl 4-cyano-1-m-tolyl-9H-fluorene-2-carboxylate (3ai).**

White solid, 22.1 mg, 65% yield, m.p. 230.0-230.6 °C. <sup>1</sup>H NMR (300 MHz, CDCl<sub>3</sub>) δ 8.50 (d, *J* = 7.4 Hz, 1H), 8.27 (s, 1H), 7.54 – 7.41 (m, 3H), 7.37 (t, *J* = 7.5 Hz, 1H), 7.25 (d, *J* = 7.5 Hz, 1H), 7.06 (d, *J* = 9.3 Hz, 2H), 3.69 (d, *J* = 7.1 Hz, 5H), 2.42 (s, 3H) ppm. <sup>13</sup>C NMR (75 MHz, CDCl<sub>3</sub>) δ 166.5, 145.6, 144.9, 144.8, 144.2, 138.3, 138.1, 138.1, 137.9, 134.1, 129.4, 128.7, 128.6, 128.2, 127.5, 124.9, 124.8, 123.0, 117.6, 103.1, 52.2, 36.9, 21.5 ppm. IR (KBr) ν: 740, 772, 797, 857,

1024, 1102, 1124, 1186, 1208, 1262, 1293, 1435, 1731, 2223, 2854, 2924, 2955  $\text{cm}^{-1}$ . HRMS (ESI) calcd for  $\text{C}_{23}\text{H}_{17}\text{NO}_2\text{Na}$  ( $\text{M}+\text{Na}$ )<sup>+</sup> 362.1151, found 362.1151.

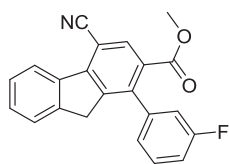

**Methyl 4-cyano-1-(3-fluorophenyl)-9H-fluorene-2-carboxylate (3aj).**

White solid, 21.3 mg, 62% yield, m.p. 212.2-212.8 °C. <sup>1</sup>H NMR (300 MHz,  $\text{CDCl}_3$ )  $\delta$  8.51 (d,  $J = 6.9$  Hz, 1H), 8.32 (s, 1H), 7.56 – 7.41 (m, 4H), 7.20 – 7.11 (m, 1H), 7.06 – 6.94 (m, 2H), 3.69 (d,  $J = 4.9$  Hz, 5H) ppm. <sup>13</sup>C NMR (75 MHz,  $\text{CDCl}_3$ )  $\delta$  166.0, 162.6 (d,  $J = 246.7$  Hz), 145.9, 145.0, 144.7, 142.6 (d,  $J = 1.6$  Hz), 140.5 (d,  $J = 8.0$  Hz), 138.0, 134.3, 130.0, (d,  $J = 8.5$  Hz), 129.7, 128.2, 127.7, 125.0, 123.5 (d,  $J = 3.0$  Hz), 123.1, 117.4, 114.9 (d,  $J = 21.8$  Hz), 114.9 (d,  $J = 21.0$  Hz), 103.7, 52.3, 36.7 ppm. IR (KBr)  $\nu$ : 747, 777, 801, 865, 1017, 1097, 1156, 1210, 1262, 1297, 1438, 1585, 1730, 2225, 2852, 2921, 2967  $\text{cm}^{-1}$ . HRMS (ESI) calcd for  $\text{C}_{22}\text{H}_{14}\text{FNO}_2\text{Na}$  ( $\text{M}+\text{Na}$ )<sup>+</sup> 366.0901, found 366.0898.

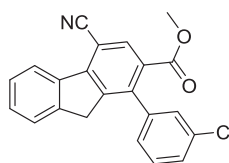

**Methyl 1-(3-chlorophenyl)-4-cyano-9H-fluorene-2-carboxylate (3ak).**

White solid, 20.1 mg, 56% yield, m.p. 235.3-236.5 °C. <sup>1</sup>H NMR (400 MHz,  $\text{CDCl}_3$ )  $\delta$  8.51 (d,  $J = 7.3$  Hz, 1H), 8.32 (s, 1H), 7.55 – 7.41 (m, 5H), 7.28 (s, 1H), 7.19 – 7.12 (m, 1H), 3.69 (d,  $J = 11.4$  Hz, 5H) ppm. <sup>13</sup>C NMR (75 MHz,  $\text{CDCl}_3$ )  $\delta$  165.9, 146.0, 144.8 (2C), 142.5, 140.2, 137.9, 134.4, 134.3, 129.7, 129.6, 128.1 (2C), 127.8, 127.7, 126.0, 125.0, 123.1, 117.4, 103.7, 52.4, 36.8 ppm. IR (KBr)  $\nu$ : 742, 774, 894, 1091, 1128, 1201, 1297, 1429, 1563, 1735, 2228, 2927, 2952  $\text{cm}^{-1}$ . HRMS (ESI) calcd for  $\text{C}_{22}\text{H}_{14}\text{ClNO}_2\text{Na}$  ( $\text{M}+\text{Na}$ )<sup>+</sup> 382.0605, found 382.0623.

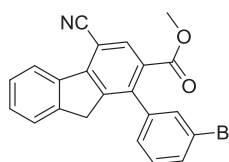

**Methyl 1-(3-bromophenyl)-4-cyano-9H-fluorene-2-carboxylate (3al).**

White solid, 24.3 mg, 60% yield, m.p. 240.0-240.7 °C. <sup>1</sup>H NMR (300 MHz,  $\text{CDCl}_3$ )  $\delta$  8.51 (d,  $J = 7.2$  Hz, 1H), 8.33 (s, 1H), 7.59 (d,  $J = 7.9$  Hz, 1H), 7.55 – 7.42 (m, 4H), 7.37 (t,  $J = 7.8$  Hz, 1H), 7.20 (d,  $J = 7.6$  Hz, 1H), 3.70 (d,  $J = 9.3$  Hz, 5H) ppm. <sup>13</sup>C NMR (75 MHz,  $\text{CDCl}_3$ )  $\delta$  165.9, 146.0, 144.8 (2C), 142.4, 140.4, 137.9, 134.4, 131.0, 130.6, 129.9, 129.8, 128.1, 127.7, 126.5, 125.0, 123.1, 122.4, 117.4, 103.7, 52.4, 36.8 ppm. IR (KBr)  $\nu$ : 740, 775, 798, 896, 998, 1098, 1128, 1199, 1258, 1290, 1431, 1452, 1559, 1734, 2225, 2848, 2924, 2952  $\text{cm}^{-1}$ . HRMS (ESI) calcd for  $\text{C}_{22}\text{H}_{14}\text{BrNO}_2\text{Na}$  ( $\text{M}+\text{Na}$ )<sup>+</sup> 426.0100, found 426.0090.

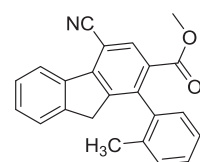

**Methyl 4-cyano-1-o-tolyl-9H-fluorene-2-carboxylate (3am).**

White solid, 17.3 mg, 51% yield, m.p. 237.1-237.8 °C. <sup>1</sup>H NMR (400 MHz,  $\text{CDCl}_3$ )  $\delta$  8.54 (d,  $J = 7.9$  Hz, 1H), 8.39 (s, 1H), 7.55 – 7.42 (m, 3H), 7.39 – 7.27 (m, 3H), 7.06 (d,  $J = 7.4$  Hz, 1H), 3.69 (s, 3H), 3.55 (dd,  $J = 66.2, 22.8$  Hz, 2H), 2.03 (s, 3H) ppm. <sup>13</sup>C NMR (75 MHz,  $\text{CDCl}_3$ )  $\delta$  165.7, 145.9, 145.0, 144.9, 144.2, 138.2, 138.0, 134.7, 134.4, 129.9, 129.6, 128.1, 128.0, 127.6, 127.1, 125.8, 125.0, 123.0, 117.6, 103.3, 52.3, 36.7, 19.6 ppm. IR (KBr)  $\nu$ : 735, 744, 773, 900, 997, 1130, 1195, 1206, 1260, 1295, 1433, 1476, 1730, 2225, 2924, 2947  $\text{cm}^{-1}$ . HRMS (ESI)  $m/z$  calcd for  $\text{C}_{23}\text{H}_{17}\text{NO}_2\text{Na}$  ( $\text{M}+\text{Na}$ )<sup>+</sup> 362.1151, found 362.1154.

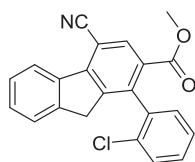

**Methyl 1-(2-chlorophenyl)-4-cyano-9H-fluorene-2-carboxylate (3an).**

White solid, 18.4 mg, 51% yield, m.p. 226.8-228.1 °C. <sup>1</sup>H NMR (400 MHz, CDCl<sub>3</sub>) δ 8.53 (d, *J* = 7.5 Hz, 1H), 8.44 (s, 1H), 7.56 – 7.45 (m, 4H), 7.44 – 7.38 (m, 2H), 7.24 – 7.19 (m, 1H), 3.72 (s, 3H), 3.63 (s, 2H) ppm. <sup>13</sup>C NMR (100 MHz, CDCl<sub>3</sub>) δ 165.3, 146.2, 145.2, 144.9, 141.5, 138.1, 137.5, 134.5, 132.1, 129.7, 129.4, 129.4, 129.1, 127.9, 127.6, 126.8, 125.1, 123.1, 117.5, 103.9, 52.3, 36.5 ppm. IR (KBr) ν: 736, 744, 770, 792, 902, 996, 1065, 1186, 1260, 1295, 1434, 1450, 1592, 1726, 2228, 2846, 2923, 2959 cm<sup>-1</sup>. HRMS (ESI) calcd for C<sub>22</sub>H<sub>14</sub>ClNO<sub>2</sub>Na (M+Na)<sup>+</sup> 382.0605, found 382.0610.

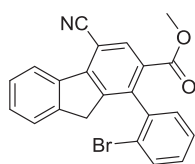

**Methyl 1-(2-bromophenyl)-4-cyano-9H-fluorene-2-carboxylate (3ao).**

White solid, 24.7 mg, 61% yield, m.p. 244.3-245.2 °C. <sup>1</sup>H NMR (300 MHz, CDCl<sub>3</sub>) δ 8.54 (d, *J* = 7.4 Hz, 1H), 8.44 (s, 1H), 7.72 (d, *J* = 7.9 Hz, 1H), 7.56 – 7.42 (m, 4H), 7.38 – 7.30 (m, 1H), 7.23 – 7.18 (m, 1H), 3.73 (s, 3H), 3.61 (d, *J* = 2.5 Hz, 2H) ppm. <sup>13</sup>C NMR (75 MHz, CDCl<sub>3</sub>) δ 165.2, 146.3, 145.0, 144.9, 143.1, 139.5, 138.1, 134.6, 132.6, 129.7, 129.4, 129.0, 127.7, 127.6, 127.4, 125.1, 123.1, 121.9, 117.5, 103.9, 52.4, 36.6 ppm. IR (KBr) ν: 727, 740, 772, 789, 902, 1026, 1132, 1212, 1286, 1296, 1335, 1380, 1562, 1646, 1719, 2223, 2854, 2921, 2952 cm<sup>-1</sup>. HRMS (ESI) m/z calcd for C<sub>22</sub>H<sub>15</sub>BrNO<sub>2</sub><sup>+</sup> (M+H)<sup>+</sup> 404.0281, found 404.0284.

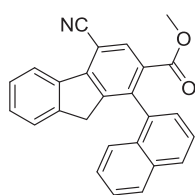

**Methyl 4-cyano-1-(naphthalen-1-yl)-9H-fluorene-2-carboxylate (3ap).**

White solid, 19.5 mg, 52% yield, m.p. 239.7-240.9 °C. <sup>1</sup>H NMR (400 MHz, CDCl<sub>3</sub>) δ 8.57 (d, *J* = 7.8 Hz, 1H), 8.47 (s, 1H), 7.96 (d, *J* = 8.2 Hz, 2H), 7.61 – 7.56 (m, 1H), 7.54 – 7.47 (m, 2H), 7.45 – 7.39 (m, 2H), 7.37 – 7.28 (m, 3H), 3.61 (d, *J* = 22.9 Hz, 1H), 3.50 (s, 3H), 3.40 (d, *J* = 22.9 Hz, 1H) ppm. <sup>13</sup>C NMR (100 MHz, CDCl<sub>3</sub>) δ 165.7, 146.0, 145.9, 144.9, 142.8, 138.1, 136.2, 134.5, 133.4, 131.0, 129.6, 129.3, 128.5, 128.3, 127.6, 126.5, 126.0, 125.3, 125.1, 125.0, 124.7, 123.1, 117.6, 103.7, 52.1, 36.6 ppm. IR (KBr) ν: 653, 744, 775, 803, 902, 1002, 1191, 1208, 1260, 1295, 1402, 1434, 1570, 1587, 1732, 2227, 2851, 2923, 2948 cm<sup>-1</sup>. HRMS (ESI) calcd for C<sub>26</sub>H<sub>17</sub>NO<sub>2</sub>Na (M+Na)<sup>+</sup> 398.1151, found 398.1164.

**Methyl 4-cyano-1-(pyridin-4-yl)-9H-fluorene-2-carboxylate (3aq).**

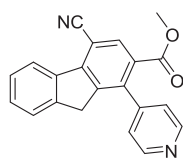

Yellow solid, 11.1 mg, 34% yield, m.p. 139.1-141.5 °C. <sup>1</sup>H NMR (400 MHz, CDCl<sub>3</sub>) δ 8.66 (d, *J* = 4.3 Hz, 1H), 8.45 8.45 (d, *J* = 7.5 Hz, 1H), 8.27 (s, 1H), 7.74-7.79 (m, 1H), 7.50 – 7.34 (m, 2H), 7.30 (t, *J* = 7.4 Hz, 1H), 3.70 (s, 2H), 3.62 (s, 3H). <sup>13</sup>C NMR (100 MHz, CDCl<sub>3</sub>) δ 166.10, 156.98, 149.56, 146.40, 145.05, 144.73, 142.47, 137.93, 136.29, 134.43, 129.74, 128.23, 127.66, 125.04, 123.41, 123.14, 122.75, 117.54, 104.01, 52.39, 36.43 ppm. IR (KBr) ν: 747, 778, 904, 999, 1133, 1201, 1296, 1428, 1587, 1732, 2228, 2856, 2930 cm<sup>-1</sup>. HRMS (ESI) calcd for C<sub>21</sub>H<sub>15</sub>N<sub>2</sub>O<sub>2</sub> (M+H)<sup>+</sup> 327.1128, found 327.1124.



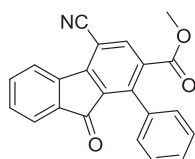

**Methyl 4-cyano-9-oxo-1-phenyl-9H-fluorene-2-carboxylate (4aa).** Yellow solid, 18.7 mg, 55% yield, m.p. 244.8-254.1 °C. <sup>1</sup>H NMR (400 MHz, CDCl<sub>3</sub>) δ 8.33 (d, *J* = 7.7 Hz, 1H), 8.20 (s, 1H), 7.68 – 7.62 (m, 2H), 7.50 – 7.44 (m, 4H), 7.26 – 7.21 (m, 2H), 3.61 (s, 3H) ppm. <sup>13</sup>C NMR (100 MHz, CDCl<sub>3</sub>) δ 189.3, 165.7, 149.1, 145.6, 139.7, 138.6, 135.5, 134.6, 134.3, 133.8, 131.9, 131.7, 128.5, 127.9, 127.7, 124.7, 123.1, 116.4, 104.3, 52.5 ppm. IR (KBr) ν: 636, 698, 746, 789, 904, 978, 1134, 1199, 1226, 1270, 1355, 1431, 1559, 1604, 1721, 2230, 1952, 3074 cm<sup>-1</sup>. HRMS (ESI) calcd for C<sub>22</sub>H<sub>13</sub>NO<sub>3</sub>Na (M+Na)<sup>+</sup> 362.0788, found 362.0791.

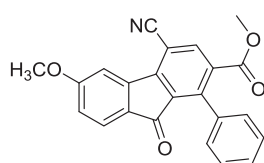

**Methyl 4-cyano-6-methoxy-9-oxo-1-phenyl-9H-fluorene-2-carboxylate (4ba).** Yellow solid, 21.4 mg, 58% yield, m.p. 171.4-173.1 °C. <sup>1</sup>H NMR (400 MHz, CDCl<sub>3</sub>) δ 8.08 (s, 1H), 7.75 (d, *J* = 2.1 Hz, 1H), 7.49 (d, *J* = 8.3 Hz, 1H), 7.39 – 7.34 (m, 3H), 7.19 – 7.14 (m, 2H), 6.83 (dd, *J* = 8.3, 2.2 Hz, 1H), 3.88 (s, 3H), 3.52 (s, 3H) ppm. <sup>13</sup>C NMR (101 MHz, CDCl<sub>3</sub>) δ 187.9, 165.9, 165.8, 148.2, 145.0, 142.3, 138.0, 134.6, 134.1, 133.0, 128.5, 128.0, 127.7, 127.3, 126.7, 116.7, 116.5, 108.8, 104.1, 56.0, 52.5 ppm. IR (KBr) ν: 701, 800, 861, 1039, 1115, 1221, 1292, 1368, 1433, 1591, 1710, 2224, 2851, 2923, 2955 cm<sup>-1</sup>. HRMS (ESI) calcd for C<sub>23</sub>H<sub>15</sub>NO<sub>4</sub>Na (M+Na)<sup>+</sup> 392.0893, found 392.0883.

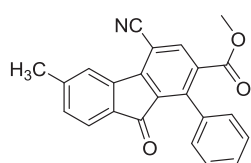

**Methyl 4-cyano-6-methyl-9-oxo-1-phenyl-9H-fluorene-2-carboxylate (4ca).** Yellow solid, 20.8 mg, 59% yield, m.p. 296.7-296.9 °C. <sup>1</sup>H NMR (300 MHz, CDCl<sub>3</sub>) δ 8.17 (s, 1H), 8.10 (s, 1H), 7.54 – 7.41 (m, 4H), 7.28 – 7.21 (m, 3H), 3.61 (s, 3H), 2.50 (s, 3H) ppm. <sup>13</sup>C NMR (75 MHz, CDCl<sub>3</sub>) δ 188.9, 165.7, 149.0, 147.0, 145.3, 140.0, 138.4, 134.6, 133.6, 132.3 (2C), 132.0, 128.4, 127.8, 127.7, 124.6, 123.7, 116.5, 104.0, 52.5, 22.3 ppm. IR (KBr) ν: 703, 712, 804, 911, 1110, 1199, 1229, 1213, 1353, 1431, 1557, 1591, 1713, 2236, 2854, 2923, 2952 cm<sup>-1</sup>. HRMS (ESI) calcd for C<sub>23</sub>H<sub>15</sub>NO<sub>3</sub>Na (M+Na)<sup>+</sup> 376.0944, found 376.0933.

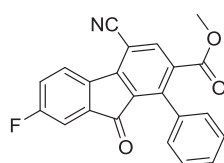

**Methyl 4-cyano-7-fluoro-9-oxo-1-phenyl-9H-fluorene-2-carboxylate (4da).** Yellow solid, 19.7 mg, 55% yield, m.p. 248.9-250.1 °C. <sup>1</sup>H NMR (300 MHz, CDCl<sub>3</sub>) δ 8.36 – 8.27 (m, 1H), 8.21 (s, 1H), 7.47 (d, *J* = 3.7 Hz, 3H), 7.32 (t, *J* = 8.0 Hz, 2H), 7.23 (d, *J* = 4.1 Hz, 2H), 3.61 (s, 3H) ppm. <sup>13</sup>C NMR (75 MHz, CDCl<sub>3</sub>) δ 188.0, 165.6, 164.9 (d, *J* = 254.3 Hz), 148.6, 145.8, 138.9, 136.8 (d, *J* = 7.8 Hz), 135.5 (d, *J* = 3.0 Hz), 134.3, 133.5, 132.0, 128.7, 127.8, 127.8, 124.9 (d, *J* = 8.5 Hz), 121.9 (d, *J* = 23.4 Hz), 116.3, 112.3 (d, *J* = 23.8 Hz), 104.1, 52.5 ppm. IR (KBr) ν: 736, 796, 876, 980, 1035, 1065, 1131, 1201, 1260, 1381, 1394, 1450, 1475, 1592, 1729, 2226, 2846, 2927 cm<sup>-1</sup>. HRMS (ESI) calcd for C<sub>22</sub>H<sub>12</sub>FNO<sub>3</sub>Na (M+Na)<sup>+</sup> 380.0693, found 380.0692.

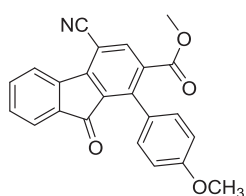

**Methyl 4-cyano-1-(4-methoxyphenyl)-9-oxo-9H-fluorene-2-carboxylate (4ab).** Yellow solid, 22.2 mg, 60% yield, m.p. 234.1-234.5 °C. <sup>1</sup>H NMR (300 MHz, CDCl<sub>3</sub>) δ 8.31 (d, *J* = 7.7 Hz, 1H),

8.13 (s, 1H), 7.68 – 7.60 (m, 2H), 7.47 (t,  $J = 7.4$  Hz, 1H), 7.19 (d,  $J = 8.6$  Hz, 2H), 6.98 (d,  $J = 8.7$  Hz, 2H), 3.88 (s, 3H), 3.65 (s, 3H) ppm.  $^{13}\text{C}$  NMR (75 MHz,  $\text{CDCl}_3$ )  $\delta$  189.5, 166.1, 159.9, 149.1, 145.3, 139.7, 138.4, 135.4, 134.2, 134.2, 131.7, 131.6, 129.5, 126.3, 124.6, 123.0, 116.5, 113.2, 103.9, 55.1, 52.6 ppm. IR (KBr)  $\nu$ : 657, 757, 772, 785, 835, 911, 969, 1026, 1037, 1128, 1227, 1244, 1270, 1288, 1433, 1520, 1561, 1611, 1722, 1738, 2230, 2834, 2950  $\text{cm}^{-1}$ . HRMS (ESI) calcd for  $\text{C}_{23}\text{H}_{15}\text{NO}_4\text{Na}$  ( $\text{M}+\text{Na}$ ) $^+$  392.0893, found 392.0897.

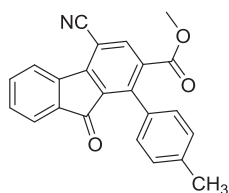

**Methyl 4-cyano-9-oxo-1-p-tolyl-9H-fluorene-2-carboxylate (4ac).**

Yellow solid, 19.8 mg, 56% yield, m.p. 260.8-261.7 °C.  $^1\text{H}$  NMR (300 MHz,  $\text{CDCl}_3$ )  $\delta$  8.32 (d,  $J = 7.8$  Hz, 1H), 8.18 (s, 1H), 7.65 (t,  $J = 6.6$  Hz, 2H), 7.47 (t,  $J = 7.4$  Hz, 1H), 7.27 (d,  $J = 7.8$  Hz, 2H), 7.14 (d,  $J = 8.0$  Hz, 2H), 3.65 (s, 3H), 2.45 (s, 3H) ppm.  $^{13}\text{C}$  NMR (75 MHz,  $\text{CDCl}_3$ )  $\delta$  189.4, 165.8, 149.1, 145.8, 139.7, 138.5, 138.4, 135.4, 134.3, 133.9, 131.8, 131.7, 131.4, 128.5, 127.8, 124.7, 123.0, 116.5, 104.1, 52.5, 21.5 ppm. IR (KBr)  $\nu$ : 540, 631, 703, 789, 846, 980, 1021, 1052, 1184, 1251, 1416, 1442, 1600, 1674, 2190, 2984, 3221  $\text{cm}^{-1}$ . HRMS (ESI) calcd for  $\text{C}_{22}\text{H}_{13}\text{NO}_3\text{Na}$  ( $\text{M}+\text{Na}$ ) $^+$  376.0944, found 376.0935.

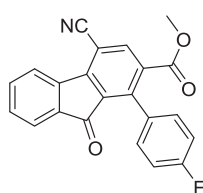

**Methyl 4-cyano-1-(4-fluorophenyl)-9-oxo-9H-fluorene-2-carboxylate (4ad).**

Yellow solid, 18.6 mg, 52% yield, m.p. 289.7-290.6 °C.  $^1\text{H}$  NMR (300 MHz,  $\text{CDCl}_3$ )  $\delta$  8.32 (d,  $J = 7.5$  Hz, 1H), 8.21 (s, 1H), 7.66 (t,  $J = 7.4$  Hz, 2H), 7.48 (t,  $J = 7.4$  Hz, 1H), 7.25 – 7.09 (m, 4H), 3.65 (s, 3H) ppm.  $^{13}\text{C}$  NMR (75 MHz,  $\text{CDCl}_3$ )  $\delta$  189.3, 165.5, 162.8 (d,  $J = 248.1$  Hz), 149.2, 144.5, 139.6, 138.8, 135.6, 134.2, 133.6, 131.9, 131.8, 130.3 (d,  $J = 3.5$  Hz), 129.8 (d,  $J = 8.3$  Hz), 124.7, 123.1, 116.3, 115.0 (d,  $J = 21.8$  Hz), 104.5, 52.6 ppm. IR (KBr)  $\nu$ : 666, 705, 796, 813, 891, 980, 1208, 1236, 1268, 1351, 1431, 1476, 1561, 1708, 1728, 2233, 2949  $\text{cm}^{-1}$ . HRMS (ESI) calcd for  $\text{C}_{22}\text{H}_{12}\text{FNO}_3\text{Na}$  ( $\text{M}+\text{Na}$ ) $^+$  380.0693, found 380.0695.

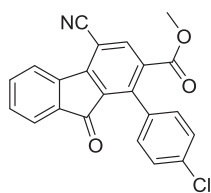

**Methyl 1-(4-chlorophenyl)-4-cyano-9-oxo-9H-fluorene-2-carboxylate (4ae).**

Yellow solid, 19.1 mg, 51% yield, m.p. 270.5-271.4 °C.  $^1\text{H}$  NMR (300 MHz,  $\text{CDCl}_3$ )  $\delta$  8.32 (d,  $J = 7.5$  Hz, 1H), 8.23 (s, 1H), 7.66 (t,  $J = 7.7$  Hz, 2H), 7.52 – 7.40 (m, 3H), 7.17 (d,  $J = 8.4$  Hz, 2H), 3.66 (s, 3H) ppm.  $^{13}\text{C}$  NMR (75 MHz,  $\text{CDCl}_3$ )  $\delta$  189.2, 165.3, 149.2, 144.3, 139.6, 138.9, 138.9, 135.6, 134.6, 134.1, 133.3, 132.9, 131.9, 129.3, 128.1, 124.8, 123.1, 116.3, 104.6, 52.6 ppm. IR (KBr)  $\nu$ : 757, 820, 833, 979, 1091, 1204, 1229, 1281, 1328, 1352, 1432, 1500, 1556, 1602, 1715, 2347, 2952  $\text{cm}^{-1}$ . HRMS (ESI) calcd for  $\text{C}_{22}\text{H}_{12}\text{ClNO}_3\text{Na}$  ( $\text{M}+\text{Na}$ ) $^+$  396.0398, found 396.0379.

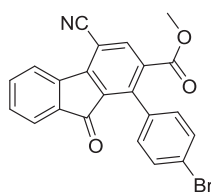

**Methyl 1-(4-bromophenyl)-4-cyano-9-oxo-9H-fluorene-2-carboxylate (4af).**

Yellow solid, 19.2 mg, 46% yield, m.p. 242.4-243.2 °C.  $^1\text{H}$  NMR (300 MHz,  $\text{CDCl}_3$ )  $\delta$  8.32 (d,  $J = 7.5$  Hz, 1H), 8.24 (s, 1H), 7.69 – 7.56 (m, 4H), 7.49 (t,  $J = 7.4$  Hz, 1H), 7.11 (d,  $J = 8.3$  Hz, 2H), 3.67 (s, 3H) ppm.  $^{13}\text{C}$  NMR (75 MHz,  $\text{CDCl}_3$ )  $\delta$  189.2, 165.3, 149.2, 144.3, 139.6, 138.9, 135.6, 134.1, 133.4, 133.2, 131.9, 131.8, 131.0, 129.6, 124.8, 123.1, 122.9, 116.3, 104.6, 52.6 ppm. IR (KBr)  $\nu$ : 643, 678, 737, 756, 789, 842, 910, 976, 1016, 1068, 1136, 1208, 1229,

1274, 1354, 1389, 1431, 1471, 1556, 1602, 1715, 2230, 2948  $\text{cm}^{-1}$ . HRMS (ESI) calcd for  $\text{C}_{22}\text{H}_{13}\text{NO}_3\text{Na}$  ( $\text{M}+\text{Na}$ ) $^+$  362.0788, found 362.0791.

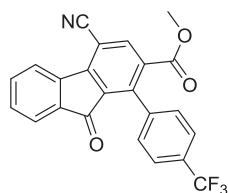

#### Methyl

#### 4-cyano-9-oxo-1-(4-(trifluoromethyl)phenyl)-9H-fluorene-2-carboxylate (4ag).

Yellow solid, 18.3 mg, 45% yield, m.p. 231.0-232.0  $^{\circ}\text{C}$ .  $^1\text{H}$  NMR (300 MHz,  $\text{CDCl}_3$ )  $\delta$  8.37 – 8.28 (m, 2H), 7.74 – 7.62 (m, 4H), 7.50 (t,  $J$  = 7.4 Hz, 1H), 7.35 (d,  $J$  = 8.0 Hz, 2H), 3.65 (s, 3H) ppm.  $^{13}\text{C}$  NMR (75 MHz,  $\text{CDCl}_3$ )  $\delta$  189.2, 165.0, 149.3, 144.0, 139.6, 139.2, 138.5 (2C), 135.7, 134.1, 132.8, 132.0 (2C), 130.7, 130.2, 128.3, 124.8 (2C), 124.7, 124.6, 123.2, 116.2, 105.0, 52.6 ppm. IR (KBr)  $\nu$ : 540, 692, 748, 779, 857, 1006, 1128, 1168, 1206, 1297, 1433, 1457, 1522, 1567, 1608, 1732, 2230, 2923, 2952  $\text{cm}^{-1}$ . HRMS (ESI) calcd for  $\text{C}_{23}\text{H}_{12}\text{F}_3\text{NO}_3\text{Na}$  ( $\text{M}+\text{Na}$ ) $^+$  430.0661, found 430.0646.

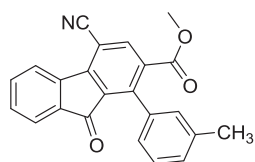

#### Methyl 4-cyano-9-oxo-1-m-tolyl-9H-fluorene-2-carboxylate (4ah).

Yellow solid, 19.1 mg, 54% yield, m.p. 230.1-231.0  $^{\circ}\text{C}$ .  $^1\text{H}$  NMR (300 MHz,  $\text{CDCl}_3$ )  $\delta$  8.33 (d,  $J$  = 7.8 Hz, 1H), 8.18 (s, 1H), 7.69 – 7.61 (m, 2H), 7.47 (t,  $J$  = 7.4 Hz, 1H), 7.39 – 7.26 (m, 2H), 7.04 (d,  $J$  = 6.9 Hz, 2H), 3.62 (s, 3H), 2.41 (s, 3H) ppm.  $^{13}\text{C}$  NMR (75 MHz,  $\text{CDCl}_3$ )  $\delta$  189.3, 165.8, 149.1, 145.7, 139.7, 138.5, 137.3, 135.4, 134.4, 134.2, 133.8, 131.8, 131.7, 129.3, 128.4, 127.6, 125.0, 124.7, 123.0, 116.5, 104.1, 52.5, 21.5 ppm. IR (KBr)  $\nu$ : 666, 696, 751, 796, 980, 1019, 1201, 1223, 1263, 1431, 1600, 1719, 2224, 2921, 2955  $\text{cm}^{-1}$ . HRMS (ESI) calcd for  $\text{C}_{23}\text{H}_{15}\text{NO}_3\text{Na}$  ( $\text{M}+\text{Na}$ ) $^+$  376.0944, found 376.0942.

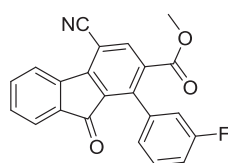

#### Methyl 4-cyano-1-(3-fluorophenyl)-9-oxo-9H-fluorene-2-carboxylate (4ai).

Yellow solid, 18.2 mg, 51% yield, m.p. 289.8-290.0  $^{\circ}\text{C}$ .  $^1\text{H}$  NMR (300 MHz,  $\text{CDCl}_3$ )  $\delta$  8.33 (d,  $J$  = 7.4 Hz, 1H), 8.25 (s, 1H), 7.66 (t,  $J$  = 7.4 Hz, 2H), 7.52 – 7.38 (m, 2H), 7.17 (t,  $J$  = 7.5 Hz, 1H), 6.98 (t,  $J$  = 9.5 Hz, 2H), 3.66 (s, 3H) ppm.  $^{13}\text{C}$  NMR (75 MHz,  $\text{CDCl}_3$ )  $\delta$  189.1, 165.2, 162.2 (d,  $J$  = 246.3 Hz), 149.2, 143.9 (d,  $J$  = 2.2 Hz), 139.6, 139.0, 136.7 (d,  $J$  = 8.3 Hz), 135.6, 134.2, 133.2, 131.9 (2C), 129.4 (d,  $J$  = 8.3 Hz), 124.8, 123.6 (d,  $J$  = 3.1 Hz), 123.2, 116.3, 115.4 (d,  $J$  = 20.3 Hz), 115.3 (d,  $J$  = 22.5 Hz), 104.8, 52.6 ppm. IR (KBr)  $\nu$ : 757, 796, 915, 978, 1134, 1210, 1229, 1273, 1357, 1433, 1565, 1600, 1721, 2230, 2955  $\text{cm}^{-1}$ . HRMS (ESI) calcd for  $\text{C}_{22}\text{H}_{13}\text{NO}_3\text{Na}$  ( $\text{M}+\text{Na}$ ) $^+$  362.0788, found 362.0791.

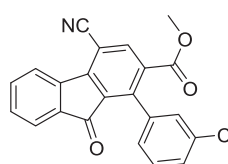

#### Methyl 1-(3-chlorophenyl)-4-cyano-9-oxo-9H-fluorene-2-carboxylate (4aj).

Yellow solid, 18.3 mg, 49% yield, m.p. 282.4-283.3  $^{\circ}\text{C}$ .  $^1\text{H}$  NMR (300 MHz,  $\text{CDCl}_3$ )  $\delta$  8.33 (d,  $J$  = 7.6 Hz, 1H), 8.26 (s, 1H), 7.67 (t,  $J$  = 7.2 Hz, 2H), 7.52 – 7.36 (m, 3H), 7.23 (s, 1H), 7.12 (d,  $J$  = 7.4 Hz, 1H), 3.66 (s, 3H) ppm.  $^{13}\text{C}$  NMR (75 MHz,  $\text{CDCl}_3$ )  $\delta$  189.1, 165.2, 149.3, 143.8, 139.6, 139.0, 136.3, 135.6, 134.2, 133.8, 133.1, 132.0, 131.9, 129.0, 128.6, 128.0, 126.1, 124.8, 123.2, 116.3, 104.8, 52.7 ppm. IR (KBr)  $\nu$ : 753, 796, 909, 978, 1077, 1136, 1206, 1225, 1270, 1431, 1556, 1591, 1602, 1717, 2230, 2955  $\text{cm}^{-1}$ . HRMS (ESI) calcd for  $\text{C}_{22}\text{H}_{13}\text{NO}_3\text{Na}$  ( $\text{M}+\text{Na}$ ) $^+$  362.0788, found 362.0791.

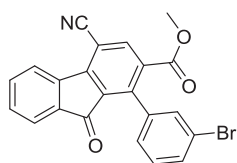

**Methyl 1-(3-bromophenyl)-4-cyano-9-oxo-9H-fluorene-2-carboxylate (4ak).** Yellow solid, 20.1 mg, 48% yield, m.p. 294.9-295.8 °C. <sup>1</sup>H NMR (300 MHz, CDCl<sub>3</sub>) δ 8.33 (d, *J* = 7.8 Hz, 1H), 8.26 (s, 1H), 7.71 – 7.56 (m, 3H), 7.49 (t, *J* = 7.4 Hz, 1H), 7.41 – 7.30 (m, 2H), 7.17 (d, *J* = 7.6 Hz, 1H), 3.67 (s, 3H) ppm. <sup>13</sup>C NMR (75 MHz, CDCl<sub>3</sub>) δ 189.1, 165.1, 149.3, 143.7 (2C), 139.59, 139.01, 136.55, 135.61, 134.16, 133.07, 131.93, 131.48, 130.74, 129.23, 126.61, 124.83, 123.17, 121.79, 116.25, 104.80, 52.66 ppm. IR (KBr) ν: 753, 796, 906, 978, 1208, 1225, 1275, 1353, 1431, 1556, 1591, 1719, 2224, 2955 cm<sup>-1</sup>. HRMS (ESI) *m/z* calcd for C<sub>22</sub>H<sub>12</sub>BrNO<sub>3</sub>Na (M+Na)<sup>+</sup> 439.9893, found 439.9889.

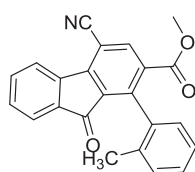

**Methyl 4-cyano-9-oxo-1-o-tolyl-9H-fluorene-2-carboxylate (4al).** Yellow solid, 14.1 mg, 40% yield, m.p. 234.5-235.1 °C. <sup>1</sup>H NMR (300 MHz, CDCl<sub>3</sub>) δ 8.40 – 8.26 (m, 2H), 7.71 – 7.61 (m, 2H), 7.48 (t, *J* = 7.4 Hz, 1H), 7.39 – 7.23 (m, 3H), 6.96 (d, *J* = 7.4 Hz, 1H), 3.63 (s, 3H), 2.05 (s, 3H) ppm. <sup>13</sup>C NMR (75 MHz, CDCl<sub>3</sub>) δ 189.3, 165.1, 149.3, 145.6, 139.9, 139.1, 135.5, 135.1, 134.8, 134.3, 133.2, 132.3, 131.8, 129.4, 128.5, 126.9, 125.4, 124.7, 123.2, 116.5, 104.4, 52.5, 19.9 ppm. IR (KBr) ν: 701, 961, 794, 948, 985, 1013, 1052, 1104, 1242, 1407, 1442, 1608, 1665, 2193, 2993, 3169, 3354 cm<sup>-1</sup>. HRMS (ESI) calcd for C<sub>22</sub>H<sub>13</sub>NO<sub>3</sub>Na (M+Na)<sup>+</sup> 362.0788, found 362.0791.

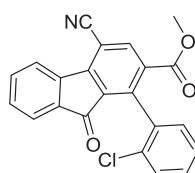

**Methyl 1-(2-chlorophenyl)-4-cyano-9-oxo-9H-fluorene-2-carboxylate (4am).** Yellow solid, 18.3 mg, 49% yield, m.p. 246.7-247.8 °C. <sup>1</sup>H NMR (300 MHz, CDCl<sub>3</sub>) δ 8.42 (s, 1H), 8.34 (d, *J* = 7.5 Hz, 1H), 7.66 (t, *J* = 7.7 Hz, 2H), 7.52 – 7.33 (m, 4H), 7.17 – 7.12 (m, 1H), 3.70 (s, 3H) ppm. <sup>13</sup>C NMR (75 MHz, CDCl<sub>3</sub>) δ 189.0, 164.4, 149.5, 142.6, 139.8, 139.6, 135.6, 134.3, 134.2, 132.5, 132.2, 132.0, 131.9, 129.7, 128.9 (2C), 126.3, 124.8, 123.2, 116.3, 105.0, 52.7 ppm. IR (KBr) ν: 677, 727, 742, 751, 785, 911, 969, 1065, 1136, 1203, 1283, 1435, 1559, 1589, 1734, 2230, 2851, 2921, 2950 cm<sup>-1</sup>. HRMS (ESI) calcd for C<sub>22</sub>H<sub>12</sub>ClNO<sub>3</sub>Na (M+Na)<sup>+</sup> 396.0398, found 396.0390.

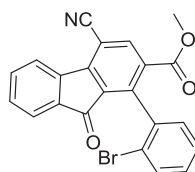

**Methyl 1-(2-bromophenyl)-4-cyano-9-oxo-9H-fluorene-2-carboxylate (4an).** Yellow solid, 19.2 mg, 46% yield, m.p. 230.0-230.7 °C. <sup>1</sup>H NMR (300 MHz, CDCl<sub>3</sub>) δ 8.42 (s, 1H), 8.34 (d, *J* = 7.6 Hz, 1H), 7.71 – 7.62 (m, 3H), 7.49 (t, *J* = 7.5 Hz, 1H), 7.44 – 7.32 (m, 2H), 7.18 – 7.11 (m, 1H), 3.70 (s, 3H) ppm. <sup>13</sup>C NMR (75 MHz, CDCl<sub>3</sub>) δ 188.9, 164.2, 149.5, 144.1, 139.8, 139.6, 136.2, 135.5, 134.2, 133.9, 132.3, 132.0, 131.9, 129.7, 128.8, 126.9, 124.8, 123.2, 121.7, 116.3, 105.0, 52.6 ppm. IR (KBr) ν: 657, 757, 848, 909, 978, 1158, 1227, 1273, 1355, 1433, 1517, 1561, 1600, 1717, 2227, 2848, 2921, 2952 cm<sup>-1</sup>. HRMS (ESI) calcd for C<sub>22</sub>H<sub>13</sub>NO<sub>3</sub>Na (M+Na)<sup>+</sup> 362.0788, found 362.0791.

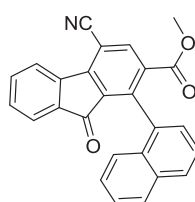

**Methyl 4-cyano-1-(naphthalen-1-yl)-9-oxo-9H-fluorene-2-carboxylate (4ao).** Yellow solid, 14.4 mg, 37% yield, m.p. 247.8-248.3 °C. <sup>1</sup>H NMR (300 MHz, CDCl<sub>3</sub>) δ 8.44 – 8.32 (m, 2H), 7.95 (t, *J* = 9.0 Hz, 2H), 7.66 (t, *J* = 7.5 Hz, 1H), 7.59 – 7.52 (m, 2H), 7.50 – 7.42 (m, 2H), 7.34 – 7.24 (m, 3H), 3.42

(s, 3H) ppm.  $^{13}\text{C}$  NMR (75 MHz,  $\text{CDCl}_3$ )  $\delta$  188.9, 164.9, 149.4, 144.3, 139.8, 139.2, 135.4, 134.3, 133.9, 133.2, 133.0, 132.9, 131.8, 131.5, 128.7, 128.6, 126.3, 125.8, 125.1, 124.9, 124.8, 124.4, 123.2, 116.5, 104.7, 52.4 ppm. IR (KBr)  $\nu$ : 536, 705, 766, 789, 928, 1015, 1049, 1189, 1243, 1405, 1602, 1635, 1661, 2184, 2978, 3184  $\text{cm}^{-1}$ . HRMS (ESI) calcd for  $\text{C}_{22}\text{H}_{13}\text{NO}_3\text{Na}$  ( $\text{M}+\text{Na}$ ) $^+$  362.0788, found 362.0791.

**Methyl 4-cyano-1-(pyridin-4-yl)-9-oxo-9H-fluorene-2-carboxylate (4ap).**

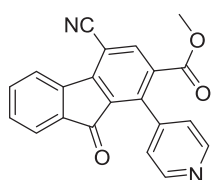

Yellow solid, 9.2 mg, 27% yield, m.p. 151.9-153.3  $^{\circ}\text{C}$ .  $^1\text{H}$  NMR (400 MHz,  $\text{CDCl}_3$ )  $\delta$  8.61 (d,  $J = 3.0$  Hz, 1H), 8.25-8.27 (m, 2H), 7.76 (t,  $J = 7.3$  Hz, 1H), 7.57-7.61 (m, 2H), 7.36 – 7.43 (m, 2H), 7.31 – 7.34 (m, 1H), 3.59 (s, 3H).  $^{13}\text{C}$  NMR (100 MHz,  $\text{CDCl}_3$ )  $\delta$  189.35, 164.97, 153.57, 149.37, 149.06, 139.88, 139.45, 135.69, 135.61, 134.28, 132.70, 132.27, 131.95, 124.86, 124.08, 123.28, 123.19, 116.35, 105.12, 52.68 ppm. IR (KBr)  $\nu$ : 750, 786, 915, 976, 1144, 1206, 1228, 1290, 1429, 1563, 1589, 1725, 2238, 2857, 2924, 2955  $\text{cm}^{-1}$ . HRMS (ESI) calcd for  $\text{C}_{21}\text{H}_{13}\text{N}_2\text{O}_3$  ( $\text{M}+\text{H}$ ) $^+$  341.0921, found 341.0908.

## 4. Procedure for the synthesis of compounds 5 and 6

**Procedure for the synthesis of compounds 5:** Under nitrogen atmosphere, to a dried tube (10 mL), compound **3aa** (60.6 mg, 0.15 mmol), *t*-BuOK (3.0 equiv.), 1-bromododecane (2.2 equiv.) were successively added, followed by adding THF (1.0 mL). The resulting mixture was stirred at 30 °C for 1.5 h till almost full consumption of **3aa** (monitored by TLC), and then the reaction mixture was purified by column chromatography on silica gel (petroleum ether/ ethyl acetate) to afford the corresponding product **5**.

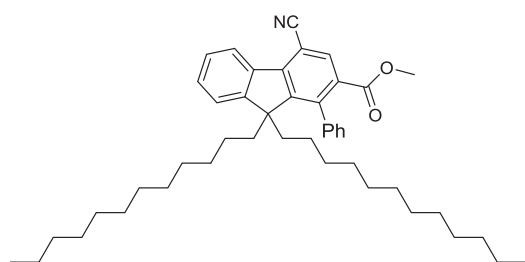

### Methyl

#### 4-cyano-9,9-didodecyl-1-phenyl-9H-fluorene-2-

#### -carboxylate (**5**). White solid, 20.8 mg, 21%

yield, m.p. 222.4-225.1 °C. <sup>1</sup>H NMR (400 MHz, CDCl<sub>3</sub>) δ 8.49 (dd, *J* = 6.2, 2.3 Hz, 1H), 8.17 (s, 1H), 7.47 – 7.41 (m, 5H), 7.28 (dd, *J* = 6.1, 2.4 Hz, 1H), 7.20 (dd, *J* = 7.6, 1.5 Hz, 2H), 3.57 (s,

3H), 1.67 – 1.60 (m, 4H), 1.29 – 0.98 (m, 38H), 0.87 (t, *J* = 6.9 Hz, 8H). <sup>13</sup>C NMR (100 MHz, CDCl<sub>3</sub>) δ 166.7, 153.2, 148.4, 146.1, 143.5, 137.0, 136.9, 133.7, 130.8, 130.2, 128.3, 128.1, 127.6, 127.5, 122.7, 121.9, 117.9, 103.5, 57.5, 52.2, 39.3, 31.9, 29.6, 29.5, 29.3, 29.2, 23.4, 22.7, 14.1. HRMS (ESI) calcd for C<sub>46</sub>H<sub>63</sub>NO<sub>2</sub>Na (M+Na)<sup>+</sup> 684.4751, found 684.4764 .

**Procedure for the synthesis of compounds 6:** Under nitrogen atmosphere, to a dried tube (10 mL), compound **3af** (60.6 mg, 0.15 mmol), 4-chlorophenylboronic acid (1.5 equiv.), Cs<sub>2</sub>CO<sub>3</sub> (2.0 equiv.), Pd(OAc)<sub>2</sub> (0.05 equiv.) and butyl di-1-adamantylphosphine (0.06 equiv.) were successively added, followed by adding DME (2.0 mL). The resulting mixture was stirred at 80 °C for 40 h till almost full consumption of **3af** (monitored by TLC), and then the reaction mixture was purified by column chromatography on silica gel (petroleum ether/ ethyl acetate) to afford the corresponding product **6**.

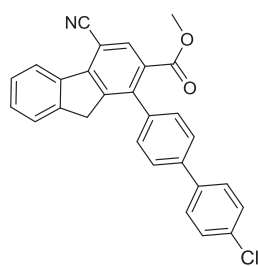

### Methyl

#### 1-(2-(4-chlorophenyl)phenyl)-4-cyano-9-oxo-9H-fluorene-2-carb

#### oxylate (**6**). Yellow solid, 30.1 mg, 46% yield, m.p. 94.6-97.7 °C. <sup>1</sup>H

NMR (400 MHz, CDCl<sub>3</sub>) δ 8.54 (d, *J* = 7.6 Hz, 1H), 8.33 (s, 1H), 7.68 (d, *J* = 8.3 Hz, 2H), 7.61 (d, *J* = 8.5 Hz, 2H), 7.51 (t, *J* = 8.3 Hz, 2H), 7.48 – 7.42 (m, 3H), 7.35 (d, *J* = 8.2 Hz, 2H), 3.74 (s, 2H), 3.71 (s, 3H). <sup>13</sup>C

NMR (100 MHz, CDCl<sub>3</sub>) δ 166.3, 145.9, 145.0, 144.9, 143.7, 139.4, 138.9, 138.2, 137.8, 134.4, 133.7, 129.7, 129.0, 128.5, 128.4, 128.3, 127.7, 126.9, 125.0, 123.1, 117.6, 103.5, 52.4, 37.0. HRMS (ESI) calcd for C<sub>28</sub>H<sub>18</sub>ClNO<sub>2</sub>Na (M+Na)<sup>+</sup> 458.0924, found 458.0935.

## 5. Studying the reaction mechanism

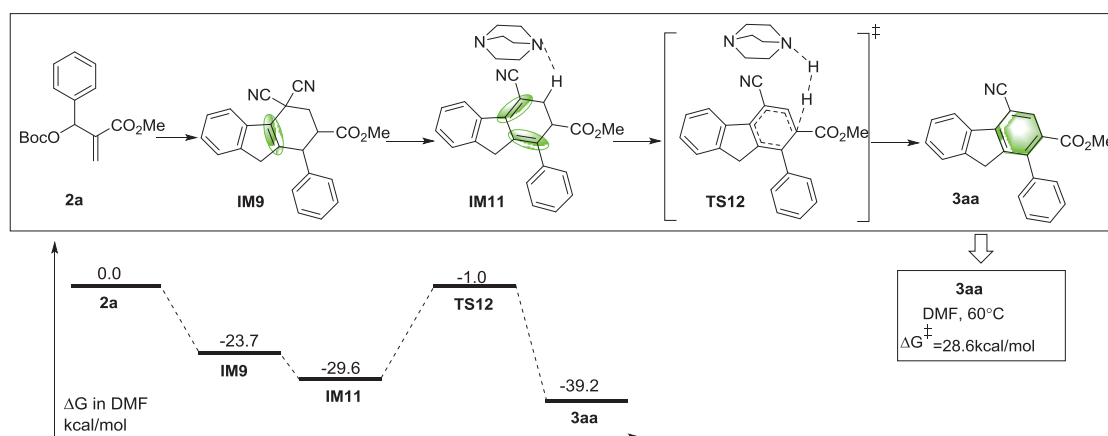

**Figure s1.** Proposed process for the benzannulation of **2a** and DFT calculation study

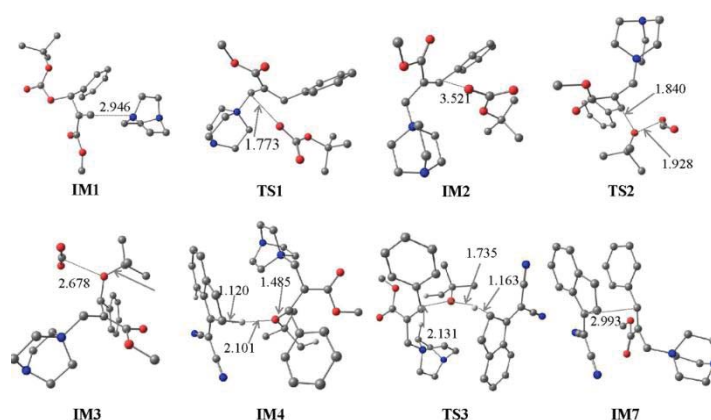

**Figure S2.** Optimized structures of the key stationary points for stage I at the m062x+D3/def2-TZVPP (smd, solvent = DMF)//BP86+D3(BJ)/def2-SVP(smd, solvent = DMF) level. The key bond distances are given in Å. All of the hydrogen atoms are omitted for clarity (color code, C: black, O: red, H: white, N: blue).

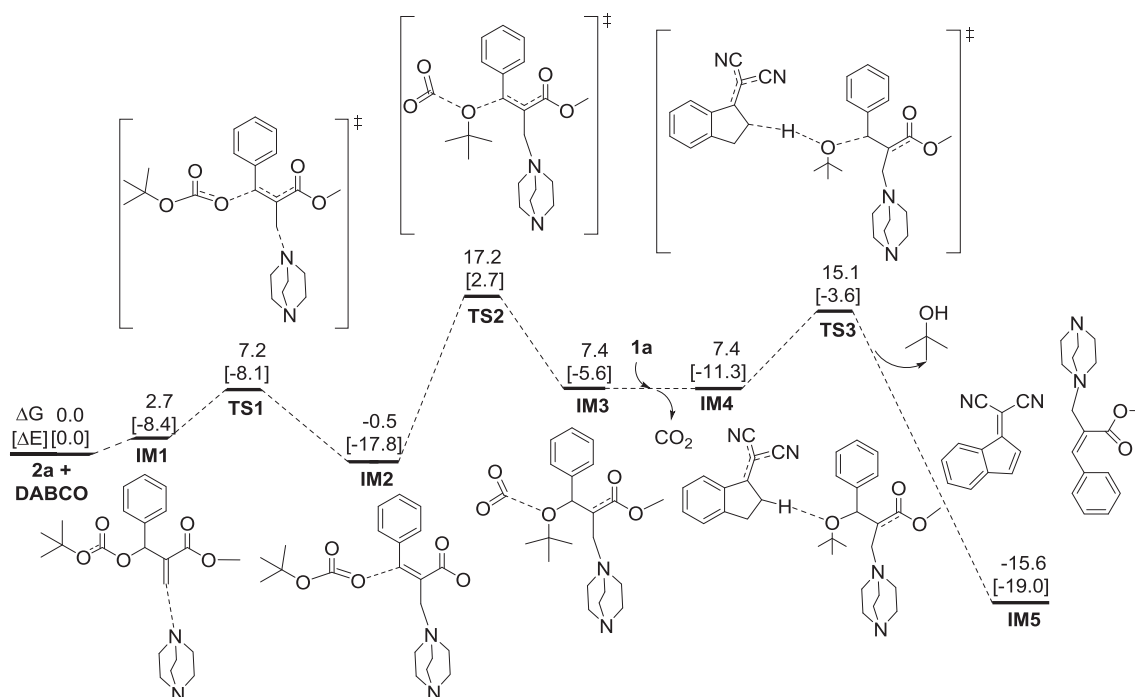

**Figure S3.** Gibbs free energy profile (in kcal/mol) for the stage I of the target reaction at the m062x + D3/def2-TZVPP (smd, solvent = DMF)//BP86+D3(BJ)/def2-SVP(smd, solvent = DMF) level. The optimized geometries are detailed in the Figure S1.

**Stage I: formation of the intermediate IM5.** As shown by the reaction course in Figure S1 and S2, the reaction initiates from the DABCO addition to the terminal unsaturated CH<sub>2</sub> species of MBH carbonates (**2a**) forming the slightly less stable intermediate **IM1**. After crossing a small barrier of 2.7 kcal/mol (**IM1**→**TS1**), the C-N bond formation is achieved leading to the intermediate **IM2** with exoergic by 0.5 kcal/mol with respect to the initial reactants. The following CO<sub>2</sub> and new <sup>t</sup>Bu-O-C bond formation step can be readily completed via a barrier of 17.7 kcal/mol (**IM2**→**TS2**), providing the weak intermediate **IM3**. With the addition of the substrate 1-indanylidene malononitrile (**1a**), the CO<sub>2</sub> can be easily released generating the comparable intermediate **IM4**. The barrier for the following C-H bond activation and H-O<sup>t</sup>Bu bond formation step is predicted to be 7.7 kcal/mol (**IM4**→**TS3**), which is quite low for experimental realization at mild conditions. With H-O<sup>t</sup>Bu liberate, the thermodynamically more stable **IM5** is formed with exoergic by 23.0 kcal/mol relative to **IM4**.

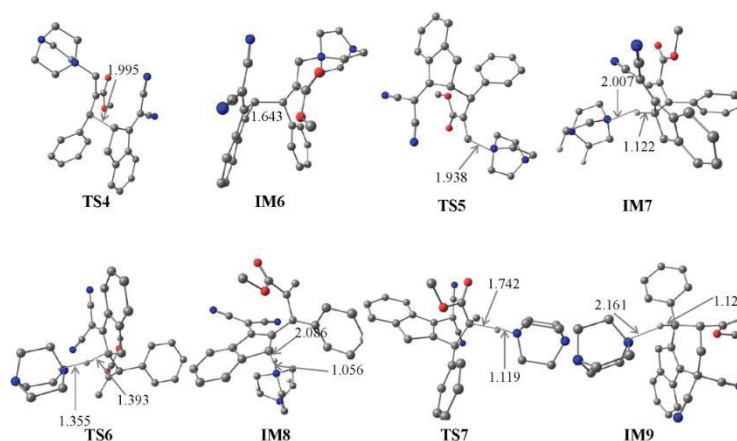

**Figure S4.** Optimized structures of the key stationary points for stage II at the m062x+D3/def2-TZVPP (smd, solvent = DMF)//BP86+D3(BJ)/def2-SVP(smd, solvent = DMF)



level. The key bond distances are given in Å. All of the hydrogen atoms are omitted for clarity (color code, C: black, O: red, H: white, N: blue).

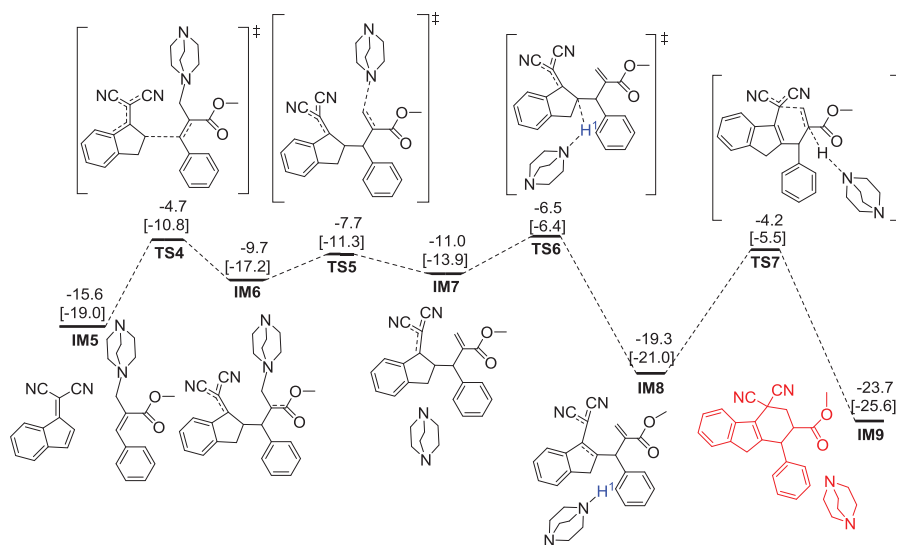

**Figure S5.** Gibbs free energy profile (in kcal/mol) for the stage II of the target reaction at the m062x + D3/def2-TZVPP (smd, solvent = DMF)//BP86+D3(BJ)/def2-SVP(smd, solvent = DMF) level. The optimized geometries are detailed in the Figure S3 of SI.

**Stage II: generation of the experimentally observed six-membered-ring species IM11.** Figure S4 shows the free energy profile for stage II, while the optimized structures are given in Figure S3 of SI. As shown by the reaction course, after crossing a barrier of 10.9 kcal/mol (**IM5**→**TS4**), the C-C coupling intermediate **IM6** is formed. Subsequently, DABCO can be easily liberated from the terminal CH<sub>2</sub> via a very small barrier of 2.0 kcal mol<sup>-1</sup> (**TS5**), giving the slightly more stable intermediate **IM7**. The DABCO then can abstract the H-atom of substrate **2a** via the transition state **TS6** with the barrier of 4.5 kcal/mol, providing the thermodynamically more stable intermediate **IM8** with exoergic by 19.3 kcal/mol. After overcoming a barrier of 15.1 kcal/mol, the terminal CH<sub>2</sub> will attack the C<sup>CN2</sup> center and form the six-membered-ring species **IM9**, which is 23.7 kcal/mol more stable than the initial reactants. It is worthy of mentioning that structure **IM9** has been successfully observed in experiment and confirmed by ESI-HRMS (**IM9** was observed in the reaction of **1a** and **2a** under the standard conditions after 10 minutes HRMS (ESI) calcd for C<sub>22</sub>H<sub>17</sub>N Na O<sub>2</sub> (**IM9**+Na)<sup>+</sup> 377.1260, found 377.1243), which suggest the herein reasonable reaction pathway.

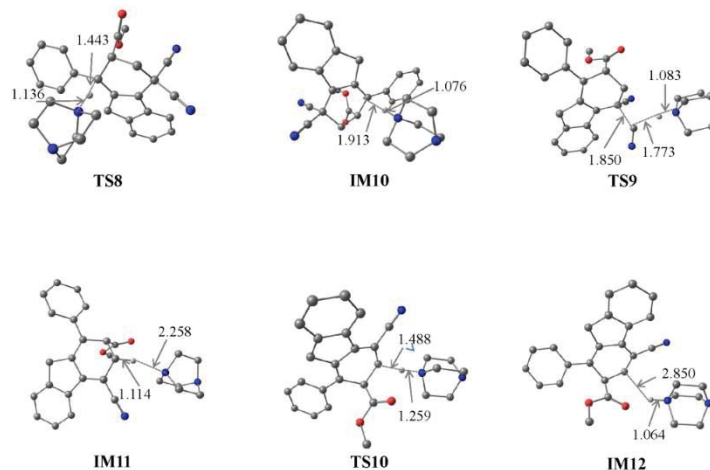

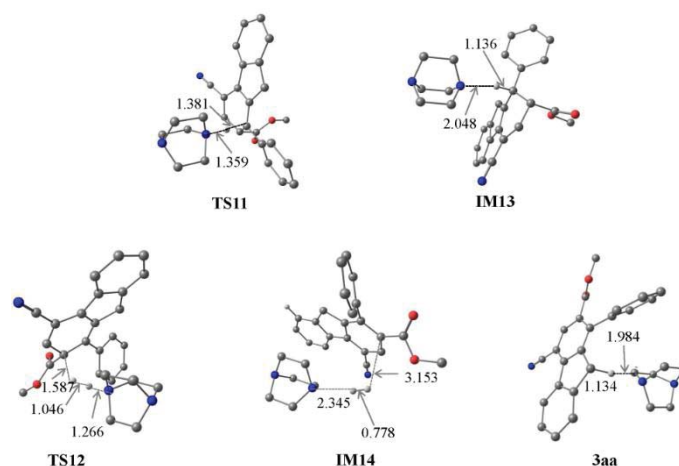

**Figure S5.** Optimized structures of the key stationary points for stage III at the m062x+D3/def2-TZVPP (smd, solvent = DMF)//BP86+D3(BJ)/def2-SVP(smd, solvent = DMF) level. The key bond distances are given in Å. All of the hydrogen atoms are omitted for clarity (color code, C: black, O: red, H: white, N: blue).

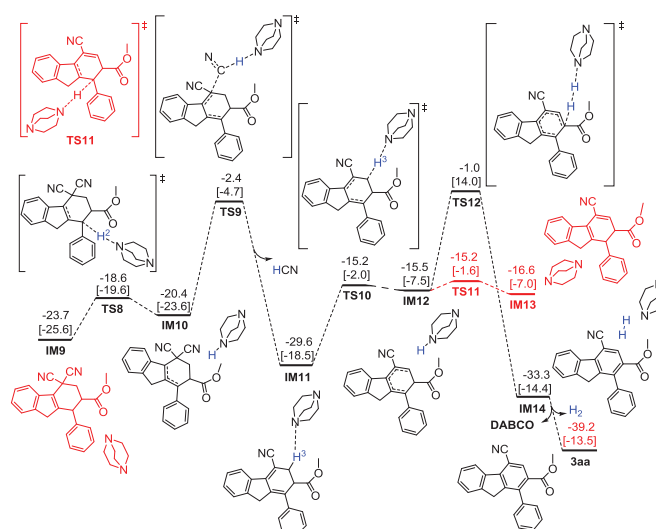

**Figure S7.** Gibbs free energy profile (in kcal/mol) for the stage II of the target reaction at the m062x + D3/def2-TZVPP (smd, solvent = DMF)//BP86+D3(BJ)/def2-SVP(smd, solvent = DMF) level. The optimized geometries are detailed in the Figure S3 of SI.

### Stage III: formation of the experimentally detected aromatic complex 3aa.

Subsequent to the formation of the six-membered-ring intermediate **IM9**, the HCN could be released successfully via the following stepwise mechanism (see Figure S6). By overcoming a barrier (**TS8**), the H<sup>2</sup>-atom is first transferred to DABCO moiety, giving the **IM10** intermediate. The DABCO-H<sup>2</sup> moiety then slightly adjusts its position and transfer the activated H-atom to the C<sup>CN</sup> center via the **TS9** transition state, liberating HCN and generating the **IM11** intermediate. The barriers for the two steps are 5.1, and 18.0 kcal/mol, respectively. The process is also exoergic respect to **IM9**. Therefore, the HCN liberation is kinetically and thermodynamically favorable.

The H<sup>3</sup>-atom can be further transferred to the DABCO moiety by crossing a barrier of 14.4 kcal/mol (**IM11**→**TS10**) providing the less stable intermediate **IM12**, followed by reversible H-transfer step via very small barrier (**IM12**→**TS11**) to generate the weak complex **IM13**, which agree well with the experimentally detected intermediate. Nonetheless, because of the favorable aromatic driving force, the

thermodynamically less stable **IM13** will easily transfer back to **IM12**, followed by the C-H bond activation and H-H molecule formation step via a barrier of 14.5 kcal/mol (**IM12**→**TS12**) leading to the aromatic complex **IM14**. If measured from the more stable **IM11**, the barrier is predicted to be 28.6 kcal/mol, which is also the highest barrier during the whole catalysis. Therefore, the aromatic H<sub>2</sub> release step should be the rate-determining step for the target reaction. With H<sub>2</sub> and DABCO release, the final aromatic product **3aa** is formed with highly exoergic by 39.2 kcal/mol, implying a thermodynamically favorable process.

Table S2 : Coordinates of the calculated structures at the BP86+D3(BJ)/def2-SVP(smd, solvent=N,N-DiMethylFormamide) level. The reaction energies at the M06-2X+D3/def2-TZVPP(smd, solvent=N,N-DiMethylFormamide)//BP86+D3(BJ)/def2-SVP (smd, solvent=N,N-DiMethylFormamide) level.

1a

E= -571. 2039949

G= -571. 0809069

|   |           |           |           |
|---|-----------|-----------|-----------|
| C | 1.619824  | -0.988222 | 0.000111  |
| C | 0.700757  | 0.102737  | -0.000075 |
| C | 1.172165  | 1.439647  | -0.000141 |
| C | 2.552638  | 1.665553  | -0.000090 |
| C | 3.460572  | 0.581625  | 0.000037  |
| C | 3.001706  | -0.746568 | 0.000137  |
| H | 0.477023  | 2.290212  | -0.000281 |
| H | 2.935772  | 2.697601  | -0.000184 |
| H | 4.543622  | 0.783196  | 0.000074  |
| H | 3.715608  | -1.585096 | 0.000250  |
| C | -0.654702 | -0.425781 | -0.000155 |
| C | 0.901509  | -2.311572 | 0.000369  |
| C | -0.598039 | -1.936600 | -0.000581 |
| C | -1.859202 | 0.273184  | 0.000031  |
| C | -1.957275 | 1.698278  | 0.000141  |
| N | -2.056954 | 2.870390  | 0.000093  |
| C | -3.099484 | -0.440686 | 0.000028  |
| N | -4.114640 | -1.034883 | 0.000206  |
| H | 1.180655  | -2.915697 | 0.889476  |
| H | 1.181644  | -2.916849 | -0.887618 |
| H | -1.138827 | -2.336259 | 0.884061  |
| H | -1.137161 | -2.335223 | -0.886745 |

2a

E= -997. 2382538

G= -996. 9642658

|   |          |          |          |
|---|----------|----------|----------|
| C | 0.270810 | 3.387768 | 0.872273 |
| C | 0.475046 | 2.042904 | 1.225409 |

---

|   |           |           |           |
|---|-----------|-----------|-----------|
| C | 0.351403  | 1.023696  | 0.260396  |
| C | 0.025518  | 1.365916  | -1.065624 |
| C | -0.187755 | 2.709624  | -1.416996 |
| C | -0.065750 | 3.725215  | -0.451073 |
| H | 0.367070  | 4.174766  | 1.637313  |
| H | 0.729906  | 1.779138  | 2.265151  |
| H | -0.059481 | 0.578929  | -1.828691 |
| H | -0.449320 | 2.965261  | -2.456336 |
| H | -0.233391 | 4.777933  | -0.729193 |
| C | 0.558854  | -0.421310 | 0.701158  |
| H | -0.009857 | -0.578387 | 1.638581  |
| C | 2.010592  | -0.753886 | 0.993731  |
| C | 2.982414  | -0.650312 | -0.143727 |
| O | 2.701864  | -0.247061 | -1.263512 |
| O | 4.226084  | -1.053849 | 0.208518  |
| C | 5.229925  | -0.954406 | -0.817134 |
| H | 5.338765  | 0.092509  | -1.167128 |
| H | 6.172994  | -1.299040 | -0.355062 |
| H | 4.976290  | -1.598021 | -1.684500 |
| C | 2.399018  | -1.090370 | 2.243381  |
| O | 0.089827  | -1.371691 | -0.290696 |
| C | -1.240663 | -1.478166 | -0.538689 |
| O | -1.639776 | -2.155505 | -1.467890 |
| O | -1.962610 | -0.788581 | 0.354889  |
| C | -3.430241 | -0.591699 | 0.185066  |
| C | -3.683465 | 0.122373  | -1.144953 |
| C | -4.142640 | -1.943471 | 0.277549  |
| C | -3.782812 | 0.307354  | 1.370874  |
| H | -3.118618 | 1.075818  | -1.189744 |
| H | -3.386880 | -0.510049 | -2.003339 |
| H | -4.763595 | 0.354265  | -1.239628 |
| H | -3.876399 | -2.461724 | 1.221839  |
| H | -5.240110 | -1.783028 | 0.272058  |
| H | -3.876914 | -2.595779 | -0.575359 |
| H | -4.865595 | 0.543946  | 1.355012  |
| H | -3.550290 | -0.195438 | 2.331673  |
| H | -3.215558 | 1.259076  | 1.325589  |
| H | 1.663074  | -1.155651 | 3.061647  |
| H | 3.453261  | -1.298400 | 2.479815  |

DABCO

E= -345.1152273

---

G= -344.9678213

|   |           |           |           |
|---|-----------|-----------|-----------|
| C | -0.784194 | -0.423353 | -1.320853 |
| C | 0.783468  | -0.423760 | -1.321153 |
| H | -1.188985 | -1.434830 | -1.538921 |
| H | -1.188987 | 0.273232  | -2.085906 |
| H | 1.187656  | -1.435388 | -1.539628 |
| H | 1.188319  | 0.272812  | -2.086187 |
| C | -0.783858 | -0.932111 | 1.027303  |
| H | -1.188427 | -0.615529 | 2.012436  |
| H | -1.188465 | -1.942996 | 0.806309  |
| C | 0.783471  | -0.932815 | 1.026952  |
| H | 1.188760  | -0.616845 | 2.011987  |
| H | 1.187069  | -1.944009 | 0.805524  |
| C | 0.784184  | 1.355606  | 0.293698  |
| H | 1.189086  | 1.669781  | 1.279471  |
| H | 1.188953  | 2.050060  | -0.473357 |
| C | -0.783065 | 1.356235  | 0.293754  |
| H | -1.187635 | 1.671024  | 1.279468  |
| H | -1.187329 | 2.050791  | -0.473474 |
| N | -1.284975 | 0.000700  | 0.000490  |
| N | 1.284968  | -0.000260 | 0.000092  |

Co2

E= -188.4562507

G= -188.4657887

|   |          |          |           |
|---|----------|----------|-----------|
| C | 0.000000 | 0.000000 | 0.000000  |
| O | 0.000000 | 0.000000 | 1.174938  |
| O | 0.000000 | 0.000000 | -1.174938 |

Tbuoh

E= -233.5158834

G= -233.4146834

|   |           |           |           |
|---|-----------|-----------|-----------|
| C | 1.501303  | 0.000061  | -0.327476 |
| C | 0.007939  | 0.000000  | 0.018003  |
| H | 1.997848  | 0.898232  | 0.095308  |
| H | 1.997915  | -0.898082 | 0.095287  |
| H | 1.656372  | 0.000078  | -1.425419 |
| C | -0.678585 | -1.265260 | -0.526258 |
| C | -0.678696 | 1.265189  | -0.526284 |
| H | -1.754389 | -1.278372 | -0.245523 |
| H | -0.620748 | -1.320340 | -1.633732 |

---

|   |           |           |           |
|---|-----------|-----------|-----------|
| H | -0.202784 | -2.175762 | -0.106202 |
| H | -0.620888 | 1.320237  | -1.633761 |
| H | -1.754495 | 1.278223  | -0.245523 |
| H | -0.202958 | 2.175742  | -0.106268 |
| O | -0.050763 | 0.000013  | 1.460493  |
| H | -1.001540 | -0.000002 | 1.693978  |

#### HCN

E= -93.3570025

G= -93.3604185

|   |          |          |           |
|---|----------|----------|-----------|
| C | 0.000000 | 0.000000 | -0.505391 |
| H | 0.000000 | 0.000000 | -1.598409 |
| N | 0.000000 | 0.000000 | 0.661536  |

#### H2

E= -1.1718916

G= -1.1737446

|   |          |          |           |
|---|----------|----------|-----------|
| H | 0.000000 | 0.000000 | 0.384106  |
| H | 0.000000 | 0.000000 | -0.384106 |

#### IM1

E= -1342.366878

G= -1341.927776

|   |           |           |           |
|---|-----------|-----------|-----------|
| C | -0.339045 | -2.775446 | 0.466529  |
| C | -0.572968 | -1.656669 | -0.350498 |
| C | -0.827923 | -0.393508 | 0.218853  |
| C | -0.874226 | -0.266479 | 1.621754  |
| C | -0.646262 | -1.386865 | 2.439331  |
| C | -0.369343 | -2.641979 | 1.866675  |
| H | -0.138227 | -3.756403 | 0.007317  |
| H | -0.566038 | -1.762927 | -1.446957 |
| H | -1.068881 | 0.721140  | 2.062221  |
| H | -0.680999 | -1.277515 | 3.535184  |
| H | -0.186287 | -3.517153 | 2.510112  |
| C | -1.020870 | 0.801959  | -0.705872 |
| H | -1.299933 | 0.413480  | -1.704986 |
| C | 0.236052  | 1.638787  | -0.884352 |
| C | 0.667974  | 2.538648  | 0.226336  |
| O | 0.170264  | 2.586862  | 1.344659  |
| O | 1.712895  | 3.330205  | -0.137708 |

---

|   |           |           |           |
|---|-----------|-----------|-----------|
| C | 2.242965  | 4.175189  | 0.895887  |
| H | 2.590158  | 3.576163  | 1.762972  |
| H | 3.095494  | 4.713832  | 0.442770  |
| H | 1.481906  | 4.901956  | 1.247814  |
| C | 1.006306  | 1.478672  | -1.988136 |
| O | -2.080509 | 1.684574  | -0.235429 |
| C | -3.333364 | 1.189630  | -0.091444 |
| O | -4.178423 | 1.809130  | 0.529115  |
| O | -3.471577 | 0.017129  | -0.728780 |
| C | -4.650935 | -0.860302 | -0.497043 |
| C | -4.731095 | -1.194520 | 0.994879  |
| C | -5.914479 | -0.174142 | -1.021786 |
| C | -4.307034 | -2.102433 | -1.319956 |
| H | -3.782080 | -1.652980 | 1.341309  |
| H | -4.933780 | -0.291217 | 1.601271  |
| H | -5.550201 | -1.921380 | 1.169321  |
| H | -5.797430 | 0.096709  | -2.091328 |
| H | -6.774469 | -0.869557 | -0.936585 |
| H | -6.141529 | 0.741161  | -0.443929 |
| H | -5.127174 | -2.844485 | -1.246698 |
| H | -4.167625 | -1.841271 | -2.388786 |
| H | -3.374026 | -2.571294 | -0.947552 |
| H | 0.704378  | 0.789187  | -2.793238 |
| H | 1.937367  | 2.043101  | -2.119067 |
| C | 3.853366  | -2.571133 | -0.453929 |
| C | 2.950296  | -1.653755 | -1.346761 |
| H | 4.546343  | -3.182182 | -1.070691 |
| H | 3.236945  | -3.267883 | 0.153611  |
| H | 3.165598  | -1.795651 | -2.426803 |
| H | 1.875819  | -1.866618 | -1.182617 |
| C | 5.504593  | -0.831942 | -0.326249 |
| H | 6.112699  | -0.224188 | 0.377121  |
| H | 6.203697  | -1.444690 | -0.934289 |
| C | 4.609502  | 0.080803  | -1.236755 |
| H | 4.765146  | 1.156554  | -1.009607 |
| H | 4.833685  | -0.075050 | -2.313170 |
| C | 2.866830  | -0.012073 | 0.410639  |
| H | 3.052327  | 1.057874  | 0.636214  |
| H | 1.785867  | -0.205456 | 0.559266  |
| C | 3.746365  | -0.946171 | 1.308057  |
| H | 4.357376  | -0.357701 | 2.025299  |
| H | 3.114727  | -1.645824 | 1.895437  |
| N | 4.657107  | -1.743639 | 0.464921  |

---

|   |          |           |           |
|---|----------|-----------|-----------|
| N | 3.189708 | -0.239298 | -1.008170 |
|---|----------|-----------|-----------|

TS1

E= -1342.366458

G= -1341.920616

|   |           |           |           |
|---|-----------|-----------|-----------|
| C | -3.804850 | 2.099343  | 1.463729  |
| C | -2.545193 | 1.478965  | 1.537496  |
| C | -1.742302 | 1.324736  | 0.386328  |
| C | -2.236640 | 1.792813  | -0.849578 |
| C | -3.499673 | 2.401663  | -0.927766 |
| C | -4.289033 | 2.561487  | 0.227025  |
| H | -4.415083 | 2.209082  | 2.374722  |
| H | -2.176747 | 1.101263  | 2.505461  |
| H | -1.621069 | 1.667193  | -1.748763 |
| H | -3.873847 | 2.755104  | -1.902483 |
| H | -5.280054 | 3.038686  | 0.161256  |
| C | -0.416755 | 0.630229  | 0.546739  |
| H | -0.499631 | -0.148154 | 1.324915  |
| C | 0.834066  | 1.330942  | 0.631632  |
| C | 1.094302  | 2.522712  | -0.145488 |
| O | 0.341079  | 3.112616  | -0.927445 |
| O | 2.382983  | 3.023645  | 0.076314  |
| C | 2.720101  | 4.188795  | -0.673949 |
| H | 2.058594  | 5.046743  | -0.426677 |
| H | 3.764749  | 4.439685  | -0.405250 |
| H | 2.653433  | 4.007534  | -1.768325 |
| C | 1.935740  | 0.714333  | 1.410375  |
| O | -0.369469 | -0.426969 | -0.875446 |
| C | -1.368176 | -1.265376 | -1.068084 |
| O | -1.688919 | -1.704227 | -2.170922 |
| O | -1.971398 | -1.604684 | 0.111142  |
| C | -3.274508 | -2.291949 | 0.133749  |
| C | -4.310832 | -1.452914 | -0.624819 |
| C | -3.134603 | -3.707406 | -0.439450 |
| C | -3.611032 | -2.338962 | 1.627109  |
| H | -4.376247 | -0.433316 | -0.192624 |
| H | -4.046315 | -1.367609 | -1.695916 |
| H | -5.310981 | -1.926228 | -0.544857 |
| H | -2.343430 | -4.268291 | 0.100577  |
| H | -4.089479 | -4.260039 | -0.320797 |
| H | -2.870509 | -3.668787 | -1.512580 |
| H | -4.582449 | -2.849121 | 1.787085  |



---

|   |           |           |           |
|---|-----------|-----------|-----------|
| H | -2.829560 | -2.890657 | 2.189021  |
| H | -3.681859 | -1.313089 | 2.042624  |
| H | 1.586455  | 0.181593  | 2.316891  |
| H | 2.698600  | 1.460112  | 1.693740  |
| C | 2.891710  | -2.791725 | -0.045830 |
| C | 2.070244  | -1.735495 | 0.747483  |
| H | 2.323225  | -3.130115 | -0.935076 |
| H | 3.088119  | -3.676323 | 0.592355  |
| H | 1.060856  | -1.582399 | 0.326382  |
| H | 1.989852  | -1.977997 | 1.823914  |
| C | 3.901945  | -1.130724 | -1.435824 |
| H | 4.868959  | -0.681905 | -1.739019 |
| H | 3.418885  | -1.545389 | -2.343202 |
| C | 2.981581  | -0.052979 | -0.793311 |
| H | 3.416194  | 0.962366  | -0.818866 |
| H | 1.971109  | -0.022340 | -1.240547 |
| C | 4.126533  | -0.531932 | 1.327377  |
| H | 4.635560  | 0.442233  | 1.198300  |
| H | 3.937969  | -0.696323 | 2.405388  |
| C | 4.903742  | -1.705848 | 0.662237  |
| H | 5.901568  | -1.355462 | 0.331057  |
| H | 5.054657  | -2.531068 | 1.386522  |
| N | 4.171296  | -2.230462 | -0.498403 |
| N | 2.779571  | -0.403005 | 0.661622  |

IM2

E= -1342. 381922

G= -1341. 932939

|   |           |          |           |
|---|-----------|----------|-----------|
| C | -4.342763 | 0.624054 | 2.023073  |
| C | -2.957560 | 0.723155 | 2.221955  |
| C | -2.086746 | 1.074310 | 1.156490  |
| C | -2.643156 | 1.263633 | -0.134738 |
| C | -4.024523 | 1.148583 | -0.332280 |
| C | -4.882521 | 0.843996 | 0.742967  |
| H | -5.001813 | 0.363298 | 2.866320  |
| H | -2.530789 | 0.532648 | 3.220412  |
| H | -1.974111 | 1.466654 | -0.978180 |
| H | -4.439202 | 1.282990 | -1.344167 |
| H | -5.968600 | 0.759500 | 0.578042  |
| C | -0.655184 | 1.132206 | 1.455653  |
| H | -0.387802 | 0.562433 | 2.363423  |
| C | 0.406325  | 1.737146 | 0.833408  |

---

|   |           |           |           |
|---|-----------|-----------|-----------|
| C | 0.268075  | 2.749610  | -0.255712 |
| O | -0.749788 | 3.354365  | -0.563406 |
| O | 1.470806  | 3.027267  | -0.831109 |
| C | 1.442324  | 3.986167  | -1.899462 |
| H | 1.085525  | 4.973657  | -1.541803 |
| H | 2.482675  | 4.069329  | -2.264210 |
| H | 0.779234  | 3.638376  | -2.717589 |
| C | 1.787680  | 1.477013  | 1.389080  |
| O | -0.096894 | 0.240611  | -1.905185 |
| C | -0.874702 | -0.750242 | -1.878245 |
| O | -1.672168 | -1.162211 | -2.744142 |
| O | -0.771725 | -1.466297 | -0.630040 |
| C | -1.548110 | -2.666439 | -0.364529 |
| C | -3.055555 | -2.365888 | -0.400348 |
| C | -1.168189 | -3.773834 | -1.360867 |
| C | -1.141896 | -3.075477 | 1.059065  |
| H | -3.313551 | -1.604889 | 0.363837  |
| H | -3.333709 | -1.979547 | -1.398353 |
| H | -3.642762 | -3.283537 | -0.184306 |
| H | -0.073946 | -3.962945 | -1.325023 |
| H | -1.688987 | -4.724250 | -1.117924 |
| H | -1.438453 | -3.461009 | -2.387304 |
| H | -1.718969 | -3.965267 | 1.386794  |
| H | -0.064557 | -3.332749 | 1.113247  |
| H | -1.343960 | -2.251631 | 1.774466  |
| H | 1.733080  | 1.298881  | 2.479881  |
| H | 2.472537  | 2.321263  | 1.197019  |
| C | 2.548505  | -2.241684 | 0.639345  |
| C | 1.733040  | -1.019176 | 1.148913  |
| H | 1.944740  | -2.800278 | -0.103383 |
| H | 2.785390  | -2.925776 | 1.478447  |
| H | 0.760945  | -0.940537 | 0.622011  |
| H | 1.578776  | -1.033542 | 2.244087  |
| C | 3.488009  | -0.938128 | -1.126802 |
| H | 4.434528  | -0.645582 | -1.624159 |
| H | 2.877741  | -1.506196 | -1.857457 |
| C | 2.707223  | 0.324124  | -0.663720 |
| H | 3.257003  | 1.262301  | -0.853430 |
| H | 1.689328  | 0.375924  | -1.113510 |
| C | 3.866478  | 0.162755  | 1.510949  |
| H | 4.390776  | 1.108032  | 1.275976  |
| H | 3.676739  | 0.118323  | 2.599758  |
| C | 4.617831  | -1.090994 | 0.976913  |

---

|   |          |           |          |
|---|----------|-----------|----------|
| H | 5.565955 | -0.785909 | 0.491437 |
| H | 4.865541 | -1.769715 | 1.817014 |
| N | 3.802511 | -1.822657 | 0.002109 |
| N | 2.510538 | 0.242733  | 0.838325 |

TS2

E= -1342.349183

G= -1341.904626

|   |           |           |           |
|---|-----------|-----------|-----------|
| C | 3.443710  | -2.429764 | -1.984798 |
| C | 2.766715  | -1.273659 | -1.562280 |
| C | 1.603374  | -1.362672 | -0.764299 |
| C | 1.116355  | -2.648507 | -0.435223 |
| C | 1.787275  | -3.805793 | -0.864600 |
| C | 2.960710  | -3.703493 | -1.633703 |
| H | 4.354863  | -2.334244 | -2.597681 |
| H | 3.128892  | -0.272964 | -1.833527 |
| H | 0.199043  | -2.739479 | 0.162985  |
| H | 1.389848  | -4.797134 | -0.592130 |
| H | 3.490611  | -4.611516 | -1.963904 |
| C | 0.805415  | -0.135454 | -0.417163 |
| H | 0.396882  | 0.296082  | -1.344876 |
| C | -0.126267 | -0.072344 | 0.668251  |
| C | 0.100701  | -0.738262 | 1.931409  |
| O | 1.041025  | -1.477828 | 2.254419  |
| O | -0.898692 | -0.457146 | 2.861271  |
| C | -0.740495 | -1.076653 | 4.137751  |
| H | 0.189028  | -0.741126 | 4.645042  |
| H | -1.619907 | -0.775254 | 4.739097  |
| H | -0.708462 | -2.183877 | 4.055426  |
| C | -1.223815 | 0.929405  | 0.563352  |
| O | 1.303118  | 2.009354  | -2.683998 |
| C | 1.260701  | 2.554784  | -1.613608 |
| O | 0.949222  | 3.513050  | -0.955299 |
| O | 2.039999  | 1.228192  | -0.450947 |
| C | 2.784823  | 1.632204  | 0.719653  |
| C | 3.838504  | 2.638763  | 0.214538  |
| C | 1.895089  | 2.301501  | 1.789743  |
| C | 3.500891  | 0.407963  | 1.314308  |
| H | 4.447602  | 2.186047  | -0.595240 |
| H | 3.360695  | 3.558895  | -0.176678 |
| H | 4.522613  | 2.931548  | 1.039141  |
| H | 1.204560  | 1.575689  | 2.258147  |

---

|   |           |           |           |
|---|-----------|-----------|-----------|
| H | 2.525773  | 2.735729  | 2.594553  |
| H | 1.298578  | 3.114123  | 1.334167  |
| H | 4.089061  | 0.714174  | 2.206144  |
| H | 2.773729  | -0.367596 | 1.630218  |
| H | 4.203259  | -0.038870 | 0.580955  |
| H | -0.950479 | 1.787535  | -0.080723 |
| H | -1.545660 | 1.311543  | 1.548304  |
| C | -3.678177 | -0.432663 | -2.140065 |
| C | -2.318117 | -0.009238 | -1.512544 |
| H | -3.606517 | -1.465017 | -2.536042 |
| H | -3.937833 | 0.241044  | -2.980439 |
| H | -1.590831 | -0.840196 | -1.476580 |
| H | -1.855311 | 0.853948  | -2.026631 |
| C | -4.406863 | -1.250201 | -0.014886 |
| H | -5.245491 | -1.251981 | 0.709217  |
| H | -4.277460 | -2.283217 | -0.394132 |
| C | -3.104722 | -0.766450 | 0.686159  |
| H | -3.270422 | -0.418257 | 1.721076  |
| H | -2.306150 | -1.530617 | 0.696149  |
| C | -3.570739 | 1.527438  | -0.061498 |
| H | -3.674782 | 1.842623  | 0.993590  |
| H | -3.133783 | 2.361152  | -0.642833 |
| C | -4.904238 | 1.000363  | -0.667217 |
| H | -5.706696 | 1.025191  | 0.096474  |
| H | -5.216005 | 1.641429  | -1.515485 |
| N | -4.755963 | -0.379929 | -1.144952 |
| N | -2.551409 | 0.412213  | -0.080342 |

IM3

E= -1342.362461

G= -1341.920327

|   |           |           |           |
|---|-----------|-----------|-----------|
| C | -3.556893 | 1.859405  | -2.405341 |
| C | -2.943703 | 0.839141  | -1.655914 |
| C | -1.703527 | 1.048744  | -1.017203 |
| C | -1.079063 | 2.305801  | -1.171390 |
| C | -1.680573 | 3.323365  | -1.930803 |
| C | -2.928297 | 3.109365  | -2.546980 |
| H | -4.529574 | 1.672305  | -2.889743 |
| H | -3.420275 | -0.147346 | -1.560113 |
| H | -0.111848 | 2.482884  | -0.678649 |
| H | -1.174514 | 4.297443  | -2.034730 |
| H | -3.404368 | 3.910432  | -3.135340 |

---

|   |           |           |           |
|---|-----------|-----------|-----------|
| C | -0.983609 | -0.110661 | -0.326117 |
| H | -0.415550 | -0.576372 | -1.161402 |
| C | 0.027595  | 0.224845  | 0.734015  |
| C | -0.190360 | 1.244285  | 1.702958  |
| O | -1.128917 | 2.062175  | 1.786774  |
| O | 0.825072  | 1.289015  | 2.686499  |
| C | 0.654285  | 2.291286  | 3.679292  |
| H | -0.313284 | 2.188947  | 4.217411  |
| H | 1.488653  | 2.166742  | 4.398193  |
| H | 0.693773  | 3.317984  | 3.251642  |
| C | 1.146505  | -0.713574 | 0.890159  |
| O | -1.079743 | -2.824700 | -2.341722 |
| C | -0.855673 | -3.346367 | -1.312351 |
| O | -0.583906 | -3.955821 | -0.342955 |
| O | -1.903785 | -1.227516 | -0.053041 |
| C | -2.689635 | -1.348652 | 1.163217  |
| C | -3.679188 | -2.474337 | 0.818500  |
| C | -1.815479 | -1.793818 | 2.354241  |
| C | -3.458798 | -0.064162 | 1.507619  |
| H | -4.284570 | -2.203215 | -0.071200 |
| H | -3.142312 | -3.419690 | 0.597522  |
| H | -4.371403 | -2.663891 | 1.665181  |
| H | -1.174438 | -0.973398 | 2.726080  |
| H | -2.458154 | -2.138301 | 3.192627  |
| H | -1.162273 | -2.637169 | 2.052262  |
| H | -4.010274 | -0.207883 | 2.461727  |
| H | -2.773030 | 0.800303  | 1.631134  |
| H | -4.202739 | 0.179426  | 0.722411  |
| H | 0.925679  | -1.726257 | 0.497130  |
| H | 1.520953  | -0.794764 | 1.927304  |
| C | 3.547923  | 0.006942  | -2.144226 |
| C | 2.220420  | -0.308044 | -1.394425 |
| H | 3.434987  | 0.927728  | -2.750314 |
| H | 3.806978  | -0.824903 | -2.829140 |
| H | 1.449396  | 0.470595  | -1.543247 |
| H | 1.797523  | -1.292870 | -1.669706 |
| C | 4.314337  | 1.303769  | -0.288265 |
| H | 5.164814  | 1.470633  | 0.402538  |
| H | 4.177506  | 2.224413  | -0.890106 |
| C | 3.023357  | 0.988646  | 0.520625  |
| H | 3.196219  | 0.922180  | 1.609456  |
| H | 2.205675  | 1.712100  | 0.344541  |
| C | 3.535610  | -1.402426 | 0.358942  |

---

|   |          |           |           |
|---|----------|-----------|-----------|
| H | 3.682242 | -1.427724 | 1.455535  |
| H | 3.104222 | -2.369140 | 0.035193  |
| C | 4.836903 | -1.031614 | -0.414873 |
| H | 5.674450 | -0.878726 | 0.294543  |
| H | 5.117358 | -1.852219 | -1.104833 |
| N | 4.652634 | 0.198837  | -1.196531 |
| N | 2.493880 | -0.351279 | 0.085329  |

#### IM4

E= -1725.119217

G= -1724.535441

|   |           |           |           |
|---|-----------|-----------|-----------|
| C | 1.983953  | 4.352565  | -0.521063 |
| C | 0.732128  | 3.832478  | -1.291837 |
| H | 1.987377  | 5.460928  | -0.510614 |
| H | 2.912834  | 4.010557  | -1.019971 |
| H | 0.004611  | 4.634721  | -1.520331 |
| H | 0.997065  | 3.311107  | -2.231897 |
| C | 0.726694  | 4.224004  | 1.513881  |
| H | 0.769972  | 3.916943  | 2.578128  |
| H | 0.619636  | 5.326974  | 1.482000  |
| C | -0.480027 | 3.540636  | 0.810211  |
| H | -0.965978 | 2.767367  | 1.428894  |
| H | -1.260766 | 4.248184  | 0.477847  |
| C | 1.000838  | 1.763073  | -0.030765 |
| H | 0.432232  | 0.957129  | 0.471091  |
| H | 1.399059  | 1.363711  | -0.980345 |
| C | 2.111995  | 2.393277  | 0.848055  |
| H | 2.043536  | 2.025307  | 1.891793  |
| H | 3.107981  | 2.112816  | 0.452191  |
| N | 1.994403  | 3.859350  | 0.864237  |
| N | 0.019201  | 2.834611  | -0.420911 |
| C | -1.207518 | 2.177420  | -1.219103 |
| H | -0.681664 | 1.718808  | -2.082459 |
| H | -1.771570 | 3.074421  | -1.541532 |
| C | -2.047353 | 1.231223  | -0.468767 |
| C | -1.673038 | -0.222906 | -0.516179 |
| C | -3.204228 | 1.804945  | 0.141724  |
| O | -3.548128 | 3.004431  | 0.136385  |
| O | -4.011498 | 0.873689  | 0.809998  |
| C | -5.205939 | 1.394018  | 1.382074  |
| H | -5.907463 | 1.776299  | 0.607836  |
| H | -5.685488 | 0.553675  | 1.922198  |

---

|   |           |           |           |
|---|-----------|-----------|-----------|
| H | -4.999096 | 2.222124  | 2.093166  |
| C | -2.717792 | -1.243911 | -0.986490 |
| C | -2.433822 | -2.626657 | -0.907701 |
| C | -3.901423 | -0.847506 | -1.641640 |
| C | -3.318591 | -3.581219 | -1.436381 |
| H | -1.504717 | -2.954083 | -0.418077 |
| C | -4.792411 | -1.799138 | -2.169971 |
| H | -4.119985 | 0.225604  | -1.742232 |
| C | -4.509404 | -3.172638 | -2.065442 |
| H | -3.073941 | -4.653270 | -1.358205 |
| H | -5.715925 | -1.462077 | -2.668920 |
| H | -5.207260 | -3.919257 | -2.477686 |
| H | -0.905168 | -0.270661 | -1.322453 |
| C | -1.256102 | -0.926840 | 1.970331  |
| C | -1.290085 | 0.434129  | 2.689611  |
| H | -2.094094 | 1.079047  | 2.292463  |
| H | -1.476351 | 0.281418  | 3.773571  |
| H | -0.318665 | 0.958338  | 2.585654  |
| C | -2.604776 | -1.643926 | 2.138550  |
| H | -3.409509 | -1.084536 | 1.626131  |
| H | -2.568002 | -2.677425 | 1.743082  |
| H | -2.855619 | -1.700351 | 3.219042  |
| C | -0.131644 | -1.784180 | 2.570346  |
| H | -0.099569 | -2.779932 | 2.085878  |
| H | 0.852745  | -1.291794 | 2.430574  |
| H | -0.291966 | -1.934173 | 3.658053  |
| O | -0.845221 | -0.787371 | 0.579381  |
| C | 3.494805  | -1.049795 | -0.609129 |
| C | 4.638997  | -0.598688 | 0.094076  |
| C | 5.316488  | 0.530640  | -0.379899 |
| C | 4.869166  | 1.206817  | -1.538251 |
| C | 3.736702  | 0.763408  | -2.243312 |
| C | 3.048447  | -0.367569 | -1.779798 |
| H | 4.988937  | -1.110027 | 1.001233  |
| H | 6.201425  | 0.901770  | 0.159364  |
| H | 5.414331  | 2.097037  | -1.889617 |
| H | 3.391152  | 1.298341  | -3.141411 |
| C | 1.819351  | -1.022962 | -2.353039 |
| C | 1.425620  | -2.073164 | -1.292355 |
| C | 2.596038  | -2.167751 | -0.352620 |
| C | 2.712689  | -3.182668 | 0.594368  |
| C | 3.786131  | -3.284904 | 1.530179  |
| N | 4.666273  | -3.377883 | 2.305267  |

---

|   |          |           |           |
|---|----------|-----------|-----------|
| C | 1.702552 | -4.193327 | 0.663178  |
| N | 0.848234 | -5.001726 | 0.697978  |
| H | 1.011144 | -0.288562 | -2.552009 |
| H | 2.056475 | -1.500848 | -3.328365 |
| H | 0.561888 | -1.719069 | -0.672757 |
| H | 1.131749 | -3.056299 | -1.710457 |

TS3

E= -1725.106903

G= -1724.523112

|   |           |           |           |
|---|-----------|-----------|-----------|
| C | 1.179091  | 4.645188  | -0.243217 |
| C | -0.046759 | 4.121590  | -1.047572 |
| H | 1.050150  | 5.724129  | -0.025499 |
| H | 2.109068  | 4.521954  | -0.833147 |
| H | -0.885234 | 4.843275  | -1.069761 |
| H | 0.210429  | 3.835762  | -2.084598 |
| C | 0.070187  | 3.979420  | 1.770350  |
| H | 0.213042  | 3.499663  | 2.759197  |
| H | -0.184015 | 5.044724  | 1.940696  |
| C | -1.077624 | 3.265037  | 1.002041  |
| H | -1.391933 | 2.328486  | 1.491455  |
| H | -1.966414 | 3.901737  | 0.845720  |
| C | 0.573293  | 1.894109  | -0.221930 |
| H | 0.161891  | 0.922491  | 0.143444  |
| H | 0.964079  | 1.751077  | -1.245745 |
| C | 1.635775  | 2.504134  | 0.725252  |
| H | 1.671313  | 1.945820  | 1.682954  |
| H | 2.637438  | 2.437843  | 0.257427  |
| N | 1.331759  | 3.912710  | 1.021218  |
| N | -0.569507 | 2.876546  | -0.365697 |
| C | -1.691415 | 2.257983  | -1.229842 |
| H | -1.183326 | 2.007400  | -2.180515 |
| H | -2.401605 | 3.090478  | -1.398725 |
| C | -2.406861 | 1.079509  | -0.644713 |
| C | -1.935683 | -0.212529 | -0.926229 |
| C | -3.569823 | 1.411063  | 0.175797  |
| O | -4.110867 | 2.521094  | 0.239796  |
| O | -4.012982 | 0.363943  | 0.946180  |
| C | -5.192643 | 0.611914  | 1.716440  |
| H | -6.057296 | 0.863190  | 1.066455  |
| H | -5.401546 | -0.324494 | 2.267192  |
| H | -5.038528 | 1.443658  | 2.434843  |



---

|   |           |           |           |
|---|-----------|-----------|-----------|
| C | -2.747489 | -1.442409 | -1.128740 |
| C | -2.104968 | -2.699514 | -1.240269 |
| C | -4.141107 | -1.388051 | -1.371517 |
| C | -2.829910 | -3.863097 | -1.533365 |
| H | -1.023822 | -2.743594 | -1.052853 |
| C | -4.871090 | -2.553683 | -1.657492 |
| H | -4.659294 | -0.418638 | -1.361986 |
| C | -4.222537 | -3.799533 | -1.730608 |
| H | -2.305217 | -4.829695 | -1.603566 |
| H | -5.956184 | -2.484525 | -1.837575 |
| H | -4.796221 | -4.713257 | -1.954482 |
| H | -1.035470 | -0.216530 | -1.560169 |
| C | -0.735150 | -1.232676 | 1.820444  |
| C | -1.085611 | 0.031689  | 2.641788  |
| H | -2.018012 | 0.485825  | 2.254551  |
| H | -1.246909 | -0.210788 | 3.714772  |
| H | -0.264992 | 0.776825  | 2.584116  |
| C | -1.887799 | -2.250777 | 1.974484  |
| H | -2.826916 | -1.826903 | 1.567542  |
| H | -1.664967 | -3.189315 | 1.427077  |
| H | -2.056313 | -2.508572 | 3.042906  |
| C | 0.560386  | -1.847645 | 2.401997  |
| H | 0.806479  | -2.796983 | 1.886017  |
| H | 1.412576  | -1.148818 | 2.270564  |
| H | 0.457794  | -2.066611 | 3.487137  |
| O | -0.483254 | -0.907935 | 0.469988  |
| C | 3.570432  | -0.509436 | -0.699956 |
| C | 4.652080  | 0.218863  | -0.148896 |
| C | 5.013423  | 1.437145  | -0.739189 |
| C | 4.316409  | 1.928406  | -1.866076 |
| C | 3.243276  | 1.208394  | -2.420878 |
| C | 2.869767  | -0.011357 | -1.837304 |
| H | 5.197280  | -0.148526 | 0.731378  |
| H | 5.844904  | 2.021468  | -0.315789 |
| H | 4.616847  | 2.889444  | -2.312700 |
| H | 2.704373  | 1.596269  | -3.299538 |
| C | 1.773856  | -0.960858 | -2.243537 |
| C | 1.711374  | -1.965970 | -1.075339 |
| C | 2.980229  | -1.795251 | -0.324718 |
| C | 3.483093  | -2.736918 | 0.581454  |
| C | 4.660206  | -2.540367 | 1.361749  |
| N | 5.629758  | -2.388154 | 2.012786  |
| C | 2.816659  | -3.989039 | 0.752009  |

---

|   |          |           |           |
|---|----------|-----------|-----------|
| N | 2.263682 | -5.021124 | 0.878180  |
| H | 0.812068 | -0.437945 | -2.426897 |
| H | 2.041750 | -1.466558 | -3.197931 |
| H | 0.853384 | -1.635359 | -0.362586 |
| H | 1.487917 | -3.013072 | -1.359009 |

IM5

E= -1491.615689

G= -1491.157386

|   |           |           |           |
|---|-----------|-----------|-----------|
| C | 5.865142  | -0.468703 | -1.258573 |
| C | 4.498405  | 0.222676  | -1.524088 |
| H | 6.664906  | 0.295159  | -1.193782 |
| H | 6.114685  | -1.158951 | -2.088350 |
| H | 4.548696  | 1.324185  | -1.438016 |
| H | 4.064111  | -0.040503 | -2.506297 |
| C | 5.439640  | -0.346605 | 1.093929  |
| H | 5.491416  | -0.908533 | 2.047256  |
| H | 6.164026  | 0.490009  | 1.147312  |
| C | 3.997886  | 0.205042  | 0.888600  |
| H | 3.286681  | -0.204747 | 1.629324  |
| H | 3.943612  | 1.307764  | 0.907661  |
| C | 3.438143  | -1.750441 | -0.493869 |
| H | 2.660260  | -2.046376 | 0.232565  |
| H | 3.108584  | -2.033352 | -1.511334 |
| C | 4.842453  | -2.314520 | -0.130558 |
| H | 4.797438  | -2.863666 | 0.830413  |
| H | 5.175880  | -3.021271 | -0.915787 |
| N | 5.829330  | -1.235032 | -0.007311 |
| N | 3.503499  | -0.236809 | -0.473588 |
| C | 2.138977  | 0.375122  | -0.820663 |
| H | 1.865644  | -0.080819 | -1.789498 |
| H | 2.324049  | 1.454264  | -0.973201 |
| C | 1.061905  | 0.169186  | 0.210185  |
| C | 0.202778  | -0.893692 | 0.037263  |
| C | 1.046876  | 1.212240  | 1.273842  |
| O | 1.596171  | 2.305863  | 1.164023  |
| O | 0.440395  | 0.813811  | 2.415056  |
| C | 0.298252  | 1.817535  | 3.437701  |
| H | -0.302875 | 2.668537  | 3.058309  |
| H | -0.227981 | 1.322157  | 4.274371  |
| H | 1.289217  | 2.183504  | 3.775145  |
| C | -1.000541 | -1.364320 | 0.727876  |

---

|   |           |           |           |
|---|-----------|-----------|-----------|
| C | -1.350768 | -2.729133 | 0.535559  |
| C | -1.876744 | -0.557611 | 1.499184  |
| C | -2.499830 | -3.276760 | 1.123186  |
| H | -0.695685 | -3.364895 | -0.082005 |
| C | -3.025782 | -1.106148 | 2.082618  |
| H | -1.673531 | 0.512145  | 1.617531  |
| C | -3.342468 | -2.465787 | 1.904796  |
| H | -2.744616 | -4.338655 | 0.962530  |
| H | -3.696739 | -0.456796 | 2.666024  |
| H | -4.251558 | -2.887668 | 2.361824  |
| H | 0.484783  | -1.561994 | -0.793638 |
| C | -3.280377 | 0.506033  | -1.047644 |
| C | -4.241203 | 1.133276  | -0.229567 |
| C | -5.448784 | 0.461913  | 0.038853  |
| C | -5.703255 | -0.814812 | -0.500222 |
| C | -4.754767 | -1.435616 | -1.340353 |
| C | -3.555388 | -0.770841 | -1.616782 |
| H | -4.051770 | 2.121790  | 0.213200  |
| H | -6.201700 | 0.939902  | 0.686074  |
| H | -6.650172 | -1.328700 | -0.269642 |
| H | -4.956904 | -2.429698 | -1.771232 |
| C | -2.391155 | -1.191119 | -2.480568 |
| C | -1.427066 | -0.046995 | -2.326195 |
| C | -1.931343 | 0.931352  | -1.488230 |
| C | -1.246864 | 2.148035  | -1.067534 |
| C | -1.599828 | 2.848421  | 0.104271  |
| N | -1.889465 | 3.415767  | 1.105136  |
| C | -0.105094 | 2.587855  | -1.771369 |
| N | 0.840433  | 2.938069  | -2.394799 |
| H | -1.955488 | -2.156788 | -2.128419 |
| H | -2.702619 | -1.376323 | -3.535914 |
| H | -0.446664 | -0.004541 | -2.821010 |

TS4

E= -1491.602552

G= -1491.141586

|   |           |          |           |
|---|-----------|----------|-----------|
| C | -4.650117 | 2.150012 | -0.288406 |
| C | -3.309856 | 1.456922 | -0.674335 |
| H | -5.035931 | 2.729523 | -1.150427 |
| H | -4.488019 | 2.852023 | 0.553284  |
| H | -3.067325 | 1.558377 | -1.748767 |
| H | -2.457366 | 1.822135 | -0.073986 |

---

|   |           |           |           |
|---|-----------|-----------|-----------|
| C | -5.851151 | 0.196283  | -0.972243 |
| H | -6.662858 | -0.504030 | -0.692286 |
| H | -6.169055 | 0.745332  | -1.880779 |
| C | -4.541189 | -0.594691 | -1.248470 |
| H | -4.618316 | -1.664369 | -0.977357 |
| H | -4.204899 | -0.517682 | -2.299479 |
| C | -3.795277 | -0.198882 | 1.063226  |
| H | -3.763598 | -1.282670 | 1.269890  |
| H | -2.986445 | 0.286446  | 1.639464  |
| C | -5.183900 | 0.455973  | 1.311884  |
| H | -5.930083 | -0.316656 | 1.584548  |
| H | -5.115746 | 1.177378  | 2.150347  |
| N | -5.659180 | 1.163194  | 0.115486  |
| N | -3.431010 | -0.022188 | -0.394298 |
| C | -2.112381 | -0.775695 | -0.745092 |
| H | -1.965335 | -0.549066 | -1.819811 |
| H | -2.380275 | -1.841950 | -0.632213 |
| C | -0.919694 | -0.418822 | 0.074039  |
| C | -0.059937 | 0.610156  | -0.470410 |
| C | -0.736491 | -1.272166 | 1.236418  |
| O | -1.523317 | -2.162840 | 1.596077  |
| O | 0.395404  | -1.015224 | 1.974170  |
| C | 0.582126  | -1.823851 | 3.138226  |
| H | 1.572146  | -1.544453 | 3.547218  |
| H | -0.202244 | -1.624763 | 3.899834  |
| H | 0.571955  | -2.904606 | 2.893885  |
| C | 0.784159  | 1.601828  | 0.276227  |
| C | 0.584769  | 2.969861  | -0.041656 |
| C | 1.810324  | 1.290611  | 1.199794  |
| C | 1.358779  | 3.984302  | 0.546263  |
| H | -0.196453 | 3.239107  | -0.771832 |
| C | 2.589391  | 2.301017  | 1.785093  |
| H | 1.997199  | 0.244210  | 1.453937  |
| C | 2.371254  | 3.652764  | 1.463544  |
| H | 1.173716  | 5.037130  | 0.278814  |
| H | 3.387246  | 2.023961  | 2.492730  |
| H | 2.988821  | 4.442191  | 1.921172  |
| H | -0.609824 | 1.165722  | -1.249644 |
| C | 3.212996  | -0.543588 | -0.816890 |
| C | 4.252640  | -0.986249 | 0.030603  |
| C | 5.374799  | -0.161267 | 0.210831  |
| C | 5.475338  | 1.082332  | -0.449288 |
| C | 4.451906  | 1.519509  | -1.312958 |

---

|   |           |           |           |
|---|-----------|-----------|-----------|
| C | 3.328040  | 0.706074  | -1.497056 |
| H | 4.181979  | -1.944633 | 0.564015  |
| H | 6.185353  | -0.487887 | 0.881588  |
| H | 6.362374  | 1.715034  | -0.286612 |
| H | 4.529646  | 2.490942  | -1.826850 |
| C | 2.097523  | 0.944999  | -2.336596 |
| C | 1.147293  | -0.146638 | -1.866582 |
| C | 1.910291  | -1.129995 | -1.151014 |
| C | 1.389932  | -2.400491 | -0.788243 |
| C | 2.004302  | -3.239950 | 0.178077  |
| N | 2.502224  | -3.931180 | 0.995232  |
| C | 0.217057  | -2.911653 | -1.411117 |
| N | -0.717794 | -3.373088 | -1.967670 |
| H | 1.697929  | 1.974697  | -2.228661 |
| H | 2.330133  | 0.811913  | -3.418357 |
| H | 0.341349  | -0.478253 | -2.540098 |

IM6

E= -1491.607771

G= -1491.14706

|   |           |           |           |
|---|-----------|-----------|-----------|
| C | -4.689229 | 1.884068  | -0.316585 |
| C | -3.334768 | 1.220012  | -0.701810 |
| H | -5.104367 | 2.429823  | -1.187070 |
| H | -4.538504 | 2.612086  | 0.505107  |
| H | -3.103961 | 1.310121  | -1.780071 |
| H | -2.484938 | 1.614366  | -0.115973 |
| C | -5.842080 | -0.120849 | -0.936119 |
| H | -6.624716 | -0.840429 | -0.623771 |
| H | -6.195789 | 0.395755  | -1.850603 |
| C | -4.509992 | -0.873581 | -1.221189 |
| H | -4.549895 | -1.942009 | -0.936291 |
| H | -4.193382 | -0.799984 | -2.278766 |
| C | -3.748649 | -0.414585 | 1.069423  |
| H | -3.689548 | -1.493786 | 1.293894  |
| H | -2.939556 | 0.093043  | 1.625059  |
| C | -5.148400 | 0.212611  | 1.330025  |
| H | -5.870149 | -0.570771 | 1.636111  |
| H | -5.084055 | 0.957310  | 2.148402  |
| N | -5.663629 | 0.877751  | 0.125366  |
| N | -3.411385 | -0.253029 | -0.393361 |
| C | -2.047733 | -0.970885 | -0.739006 |
| H | -1.967361 | -0.816227 | -1.834515 |

---

|   |           |           |           |
|---|-----------|-----------|-----------|
| H | -2.272621 | -2.035619 | -0.534269 |
| C | -0.852067 | -0.503586 | -0.008880 |
| C | 0.022554  | 0.496982  | -0.712106 |
| C | -0.569025 | -1.221535 | 1.201293  |
| O | -1.283624 | -2.097916 | 1.725437  |
| O | 0.630815  | -0.865250 | 1.807592  |
| C | 0.965440  | -1.591822 | 2.985622  |
| H | 1.972438  | -1.245334 | 3.290763  |
| H | 0.244395  | -1.396523 | 3.809240  |
| H | 0.991501  | -2.686504 | 2.804207  |
| C | 0.556161  | 1.701304  | 0.064131  |
| C | -0.010209 | 2.964829  | -0.232683 |
| C | 1.602648  | 1.665913  | 1.014830  |
| C | 0.427625  | 4.141231  | 0.400188  |
| H | -0.808031 | 3.025916  | -0.991306 |
| C | 2.052730  | 2.840413  | 1.641839  |
| H | 2.064465  | 0.708442  | 1.272304  |
| C | 1.468061  | 4.084172  | 1.343742  |
| H | -0.039723 | 5.106024  | 0.144545  |
| H | 2.875852  | 2.779215  | 2.372297  |
| H | 1.824476  | 5.002126  | 1.838261  |
| H | -0.627021 | 0.951921  | -1.485118 |
| C | 3.305651  | -0.443989 | -0.680519 |
| C | 4.375775  | -0.777478 | 0.182628  |
| C | 5.448207  | 0.118338  | 0.302416  |
| C | 5.469910  | 1.324753  | -0.431792 |
| C | 4.417722  | 1.653097  | -1.307761 |
| C | 3.340687  | 0.767821  | -1.434990 |
| H | 4.363617  | -1.703923 | 0.773277  |
| H | 6.280593  | -0.119056 | 0.983398  |
| H | 6.319881  | 2.015852  | -0.315709 |
| H | 4.437184  | 2.595960  | -1.876840 |
| C | 2.105132  | 0.884469  | -2.289752 |
| C | 1.153987  | -0.179012 | -1.693960 |
| C | 2.044739  | -1.119272 | -0.962604 |
| C | 1.642725  | -2.418187 | -0.632509 |
| C | 2.400109  | -3.262188 | 0.232522  |
| N | 3.011675  | -3.957424 | 0.960634  |
| C | 0.453213  | -3.004023 | -1.166382 |
| N | -0.456353 | -3.586059 | -1.642643 |
| H | 1.679704  | 1.907593  | -2.297933 |
| H | 2.348969  | 0.625289  | -3.343843 |
| H | 0.545324  | -0.698142 | -2.459075 |

---

TS5

E= -1491.603271

G= -1491.144763

|   |           |           |           |
|---|-----------|-----------|-----------|
| C | -5.205588 | 1.035650  | -0.968652 |
| C | -3.857745 | 0.348013  | -1.367516 |
| H | -5.995357 | 0.805754  | -1.712525 |
| H | -5.082579 | 2.137064  | -0.928933 |
| H | -3.949583 | -0.244296 | -2.299047 |
| H | -3.037565 | 1.079089  | -1.497766 |
| C | -5.841184 | -0.893585 | 0.300171  |
| H | -6.187497 | -1.239309 | 1.295318  |
| H | -6.638063 | -1.120675 | -0.436827 |
| C | -4.504924 | -1.611491 | -0.093274 |
| H | -4.155719 | -2.303659 | 0.697700  |
| H | -4.593021 | -2.178276 | -1.041517 |
| C | -3.266474 | 0.174502  | 0.982260  |
| H | -2.942383 | -0.552218 | 1.750309  |
| H | -2.435486 | 0.887889  | 0.818406  |
| C | -4.610594 | 0.883800  | 1.343657  |
| H | -4.962940 | 0.558353  | 2.343572  |
| H | -4.478127 | 1.984683  | 1.369925  |
| N | -5.650254 | 0.564449  | 0.350726  |
| N | -3.458571 | -0.578782 | -0.279499 |
| C | -1.778288 | -1.432518 | -0.734883 |
| H | -1.935087 | -1.368436 | -1.825491 |
| H | -2.059831 | -2.399455 | -0.287666 |
| C | -0.645284 | -0.795054 | -0.185028 |
| C | 0.056530  | 0.289333  | -0.983134 |
| C | -0.255548 | -1.254027 | 1.135879  |
| O | -0.860071 | -2.073425 | 1.842753  |
| O | 0.925705  | -0.691469 | 1.580795  |
| C | 1.417238  | -1.160585 | 2.835379  |
| H | 2.331070  | -0.574688 | 3.051298  |
| H | 0.675923  | -1.004765 | 3.647138  |
| H | 1.670428  | -2.240916 | 2.796988  |
| C | 0.172512  | 1.659624  | -0.307414 |
| C | -0.726231 | 2.665968  | -0.735525 |
| C | 1.102071  | 2.006362  | 0.701270  |
| C | -0.727252 | 3.952036  | -0.169605 |
| H | -1.440213 | 2.432535  | -1.542574 |
| C | 1.112744  | 3.294704  | 1.263975  |

---

|   |           |           |           |
|---|-----------|-----------|-----------|
| H | 1.819373  | 1.261481  | 1.057826  |
| C | 0.196965  | 4.273481  | 0.839709  |
| H | -1.446825 | 4.706307  | -0.526976 |
| H | 1.852057  | 3.533880  | 2.045636  |
| H | 0.207911  | 5.280371  | 1.287022  |
| H | -0.619806 | 0.478637  | -1.839752 |
| C | 3.394879  | -0.166976 | -0.434659 |
| C | 4.347276  | -0.339527 | 0.595870  |
| C | 5.246865  | 0.703272  | 0.857394  |
| C | 5.212736  | 1.894658  | 0.098416  |
| C | 4.277192  | 2.064985  | -0.938416 |
| C | 3.367034  | 1.034100  | -1.203890 |
| H | 4.372733  | -1.255664 | 1.201810  |
| H | 5.983961  | 0.595903  | 1.668326  |
| H | 5.925902  | 2.702628  | 0.326723  |
| H | 4.251330  | 2.998789  | -1.521451 |
| C | 2.269019  | 0.972566  | -2.234459 |
| C | 1.387374  | -0.206471 | -1.750759 |
| C | 2.309650  | -1.023330 | -0.894854 |
| C | 2.110841  | -2.383376 | -0.668176 |
| C | 2.926604  | -3.142777 | 0.224353  |
| N | 3.585957  | -3.769605 | 0.971187  |
| C | 1.084222  | -3.119844 | -1.341189 |
| N | 0.307260  | -3.791219 | -1.918373 |
| H | 1.716894  | 1.927176  | -2.336159 |
| H | 2.700278  | 0.735891  | -3.232102 |
| H | 1.000569  | -0.819779 | -2.587284 |

IM7

E= -1491.60573

G= -1491.152912

|   |           |           |           |
|---|-----------|-----------|-----------|
| C | -4.885904 | 0.898194  | -0.532304 |
| C | -4.037680 | -0.263268 | -1.150541 |
| H | -5.881564 | 0.979188  | -1.018600 |
| H | -4.369816 | 1.874727  | -0.652045 |
| H | -4.587913 | -0.784881 | -1.962153 |
| H | -3.087413 | 0.118212  | -1.575688 |
| C | -5.793018 | -0.624253 | 1.090133  |
| H | -5.954860 | -0.782429 | 2.177842  |
| H | -6.791289 | -0.545861 | 0.609011  |
| C | -4.950069 | -1.790737 | 0.465100  |
| H | -4.682196 | -2.550647 | 1.229759  |
| H | -5.510014 | -2.307175 | -0.343444 |
| C | -2.933887 | -0.584583 | 0.958963  |



---

|   |           |           |           |
|---|-----------|-----------|-----------|
| H | -2.674754 | -1.344551 | 1.725201  |
| H | -1.988675 | -0.206580 | 0.522499  |
| C | -3.773680 | 0.586947  | 1.570846  |
| H | -3.936202 | 0.442422  | 2.660294  |
| H | -3.258470 | 1.560908  | 1.431387  |
| N | -5.090334 | 0.660012  | 0.909399  |
| N | -3.703227 | -1.250874 | -0.107222 |
| C | -0.966900 | -2.190172 | -1.713424 |
| H | -1.248064 | -1.907017 | -2.739926 |
| H | -1.358873 | -3.134271 | -1.307398 |
| C | -0.158839 | -1.403696 | -0.964373 |
| C | 0.377975  | -0.090905 | -1.536753 |
| C | 0.126224  | -1.912051 | 0.421702  |
| O | -0.114038 | -3.045110 | 0.814989  |
| O | 0.677343  | -0.965669 | 1.219263  |
| C | 1.011255  | -1.365446 | 2.558705  |
| H | 1.397212  | -0.459419 | 3.059685  |
| H | 0.114884  | -1.741971 | 3.090937  |
| H | 1.786330  | -2.158076 | 2.551419  |
| C | -0.222778 | 1.181110  | -0.927199 |
| C | -1.162101 | 1.879614  | -1.722065 |
| C | 0.088809  | 1.716035  | 0.343309  |
| C | -1.786236 | 3.052717  | -1.266217 |
| H | -1.401778 | 1.493832  | -2.726359 |
| C | -0.529571 | 2.892470  | 0.801202  |
| H | 0.812880  | 1.210438  | 0.988860  |
| C | -1.472562 | 3.564591  | 0.004897  |
| H | -2.513498 | 3.570758  | -1.911154 |
| H | -0.265830 | 3.286088  | 1.795788  |
| H | -1.957009 | 4.483844  | 0.370532  |
| H | -0.008711 | -0.087323 | -2.573726 |
| C | 3.235196  | 0.668999  | 0.101412  |
| C | 3.758765  | 0.824313  | 1.405390  |
| C | 4.026846  | 2.120328  | 1.865072  |
| C | 3.797212  | 3.242064  | 1.036232  |
| C | 3.291315  | 3.091135  | -0.267248 |
| C | 3.002664  | 1.802030  | -0.732789 |
| H | 3.925574  | -0.041534 | 2.061063  |
| H | 4.413584  | 2.267437  | 2.885271  |
| H | 4.011906  | 4.251320  | 1.421903  |
| H | 3.107806  | 3.971055  | -0.902873 |
| C | 2.450606  | 1.367476  | -2.066233 |
| C | 1.948560  | -0.075333 | -1.788438 |

---

|   |          |           |           |
|---|----------|-----------|-----------|
| C | 2.804254 | -0.518163 | -0.622667 |
| C | 3.157765 | -1.844531 | -0.400064 |
| C | 3.976762 | -2.254009 | 0.697579  |
| N | 4.641710 | -2.598604 | 1.604465  |
| C | 2.727763 | -2.884858 | -1.285015 |
| N | 2.395857 | -3.741338 | -2.019268 |
| H | 1.664472 | 2.042363  | -2.455597 |
| H | 3.266939 | 1.338755  | -2.820791 |
| H | 2.108385 | -0.753838 | -2.648610 |

TS6

E= -1491.59548

G= -1491.142831

|   |           |           |           |
|---|-----------|-----------|-----------|
| C | -4.705209 | -0.212703 | -0.306696 |
| C | -3.174508 | 0.094772  | -0.355664 |
| H | -5.085336 | -0.429378 | -1.325674 |
| H | -5.269553 | 0.654738  | 0.091788  |
| H | -2.739303 | -0.114826 | -1.350285 |
| H | -2.939532 | 1.142767  | -0.087115 |
| C | -4.169105 | -2.516425 | 0.080046  |
| H | -4.438895 | -3.415861 | 0.670347  |
| H | -4.436575 | -2.710006 | -0.978681 |
| C | -2.642046 | -2.213923 | 0.217728  |
| H | -2.167426 | -2.834698 | 1.000394  |
| H | -2.090993 | -2.364071 | -0.730527 |
| C | -3.073193 | -0.593311 | 1.978567  |
| H | -2.471237 | -1.179287 | 2.700247  |
| H | -2.981286 | 0.480468  | 2.229729  |
| C | -4.568496 | -1.051653 | 1.935379  |
| H | -4.722058 | -1.951071 | 2.565571  |
| H | -5.227661 | -0.247428 | 2.321201  |
| N | -4.966869 | -1.375070 | 0.557052  |
| N | -2.483978 | -0.790726 | 0.625351  |
| C | 0.596659  | -3.283018 | 0.867681  |
| H | -0.035503 | -3.236025 | 1.768055  |
| H | 0.739290  | -4.260600 | 0.381069  |
| C | 1.189097  | -2.175532 | 0.369050  |
| C | 1.051835  | -0.825719 | 1.074152  |
| C | 2.099288  | -2.371112 | -0.812715 |
| O | 2.443136  | -3.453812 | -1.265883 |
| O | 2.526327  | -1.189916 | -1.313546 |
| C | 3.342644  | -1.245605 | -2.491223 |

---

|   |           |           |           |
|---|-----------|-----------|-----------|
| H | 3.603117  | -0.198706 | -2.731214 |
| H | 4.263476  | -1.836048 | -2.309191 |
| H | 2.783123  | -1.701125 | -3.334118 |
| C | 2.454225  | -0.261923 | 1.367261  |
| C | 3.282695  | -0.963862 | 2.268724  |
| C | 2.957289  | 0.906848  | 0.763314  |
| C | 4.582209  | -0.512444 | 2.557526  |
| H | 2.903242  | -1.882334 | 2.746832  |
| C | 4.253255  | 1.365485  | 1.052620  |
| H | 2.330059  | 1.462249  | 0.050670  |
| C | 5.073625  | 0.656498  | 1.949186  |
| H | 5.212705  | -1.075454 | 3.264617  |
| H | 4.626045  | 2.283370  | 0.570025  |
| H | 6.090747  | 1.014957  | 2.174659  |
| H | 0.647008  | -1.109135 | 2.069145  |
| C | -0.295087 | 2.373407  | -0.452543 |
| C | -0.527180 | 3.438137  | -1.354359 |
| C | -0.855799 | 4.703380  | -0.843590 |
| C | -0.971399 | 4.916492  | 0.546676  |
| C | -0.754096 | 3.860044  | 1.449277  |
| C | -0.405916 | 2.598099  | 0.946935  |
| H | -0.458782 | 3.294551  | -2.440589 |
| H | -1.032845 | 5.538126  | -1.539991 |
| H | -1.235073 | 5.916729  | 0.925780  |
| H | -0.849682 | 4.021198  | 2.534951  |
| C | -0.127654 | 1.331153  | 1.690728  |
| C | 0.048408  | 0.255772  | 0.595306  |
| C | 0.010933  | 0.945420  | -0.683670 |
| C | 0.059242  | 0.365276  | -1.986062 |
| C | 0.223331  | 1.114939  | -3.180710 |
| N | 0.390409  | 1.693495  | -4.197378 |
| C | -0.152218 | -1.016707 | -2.211546 |
| N | -0.404614 | -2.150003 | -2.429077 |
| H | 0.795302  | 1.436486  | 2.304072  |
| H | -0.932724 | 1.084801  | 2.416357  |
| H | -1.196971 | -0.369144 | 0.597390  |

IM8

E= -1491. 618758

G= -1491. 16331

|   |          |           |          |
|---|----------|-----------|----------|
| C | 4.725774 | -0.062731 | 0.503315 |
| C | 3.247249 | 0.427824  | 0.510241 |

---

|   |           |           |           |
|---|-----------|-----------|-----------|
| H | 5.223570  | 0.214026  | 1.453606  |
| H | 5.284166  | 0.409759  | -0.328823 |
| H | 2.930762  | 0.848269  | 1.481919  |
| H | 3.021080  | 1.159278  | -0.287149 |
| C | 4.040919  | -2.173101 | 1.426351  |
| H | 4.147708  | -3.271162 | 1.325217  |
| H | 4.489497  | -1.870872 | 2.393223  |
| C | 2.536569  | -1.772875 | 1.379914  |
| H | 1.871412  | -2.625496 | 1.149176  |
| H | 2.176836  | -1.276346 | 2.301352  |
| C | 2.732750  | -1.410939 | -1.061657 |
| H | 2.011915  | -2.232468 | -1.227932 |
| H | 2.581894  | -0.634477 | -1.834709 |
| C | 4.207800  | -1.898633 | -0.956822 |
| H | 4.257911  | -3.000480 | -1.060621 |
| H | 4.816534  | -1.448456 | -1.765654 |
| N | 4.789083  | -1.522405 | 0.340300  |
| N | 2.377803  | -0.779521 | 0.259266  |
| C | -2.802811 | -0.464524 | 2.804095  |
| H | -2.252754 | -1.254266 | 3.339870  |
| H | -3.600571 | 0.069897  | 3.343895  |
| C | -2.508773 | -0.153362 | 1.523786  |
| C | -1.399346 | -0.881369 | 0.753836  |
| C | -3.290594 | 0.962361  | 0.890839  |
| O | -3.907377 | 1.825160  | 1.500075  |
| O | -3.256998 | 0.899882  | -0.463962 |
| C | -3.908486 | 1.970724  | -1.167360 |
| H | -3.731551 | 1.781042  | -2.241676 |
| H | -4.997453 | 1.980439  | -0.956817 |
| H | -3.475645 | 2.949715  | -0.878146 |
| C | -1.869680 | -2.118528 | -0.010337 |
| C | -0.915079 | -3.100977 | -0.352869 |
| C | -3.205903 | -2.311246 | -0.412795 |
| C | -1.279884 | -4.240036 | -1.088195 |
| H | 0.131535  | -2.964343 | -0.036203 |
| C | -3.576629 | -3.452470 | -1.147723 |
| H | -3.968244 | -1.561622 | -0.156637 |
| C | -2.616297 | -4.419395 | -1.491519 |
| H | -0.518013 | -4.993999 | -1.343508 |
| H | -4.627018 | -3.583938 | -1.453910 |
| H | -2.907689 | -5.312000 | -2.067766 |
| H | -0.715718 | -1.259255 | 1.546524  |
| C | 0.364141  | 2.018472  | -0.951946 |

---

|   |           |           |           |
|---|-----------|-----------|-----------|
| C | 1.019334  | 3.257714  | -1.101412 |
| C | 1.363727  | 3.689590  | -2.396311 |
| C | 1.073525  | 2.897353  | -3.525476 |
| C | 0.429410  | 1.651167  | -3.378023 |
| C | 0.068687  | 1.221918  | -2.094803 |
| H | 1.259583  | 3.881706  | -0.228386 |
| H | 1.872404  | 4.658251  | -2.527107 |
| H | 1.355146  | 3.252488  | -4.529683 |
| H | 0.212950  | 1.026375  | -4.259792 |
| C | -0.583082 | -0.059050 | -1.649676 |
| C | -0.615696 | 0.065879  | -0.140810 |
| C | -0.076520 | 1.285566  | 0.257788  |
| C | 0.083229  | 1.778082  | 1.629312  |
| C | 0.118338  | 3.155296  | 1.937148  |
| N | 0.138393  | 4.312449  | 2.194711  |
| C | 0.297615  | 0.868046  | 2.682579  |
| N | 0.520529  | 0.054309  | 3.517832  |
| H | -1.616509 | -0.167543 | -2.047497 |
| H | -0.033369 | -0.954743 | -2.017975 |
| H | 1.372270  | -0.458486 | 0.212737  |

TS7

E= -1491.594081

G= -1491.139203

|   |           |           |           |
|---|-----------|-----------|-----------|
| C | 0.082452  | -1.830665 | 0.479783  |
| H | 0.527875  | -1.998788 | 1.475438  |
| H | 0.149369  | -2.704203 | -0.189563 |
| C | 0.307847  | -0.545917 | -0.130845 |
| C | -0.166309 | 0.594001  | 0.800302  |
| C | -0.027344 | -0.519401 | -1.563564 |
| O | -0.035684 | -1.495505 | -2.318262 |
| O | -0.313566 | 0.740963  | -2.037518 |
| C | -0.649003 | 0.827352  | -3.426284 |
| H | -0.867955 | 1.893877  | -3.623267 |
| H | 0.191930  | 0.494502  | -4.070367 |
| H | -1.540837 | 0.211619  | -3.665657 |
| C | 0.464537  | 1.976824  | 0.746430  |
| C | 0.163161  | 2.887781  | 1.785299  |
| C | 1.361403  | 2.387200  | -0.258860 |
| C | 0.734500  | 4.170333  | 1.814724  |
| H | -0.526371 | 2.578715  | 2.588562  |
| C | 1.942704  | 3.668468  | -0.230504 |

---

|   |           |           |           |
|---|-----------|-----------|-----------|
| H | 1.591477  | 1.702004  | -1.083728 |
| C | 1.630727  | 4.566780  | 0.804100  |
| H | 0.485382  | 4.862071  | 2.635583  |
| H | 2.642756  | 3.965116  | -1.028368 |
| H | 2.083699  | 5.570894  | 0.825454  |
| H | 0.041489  | 0.229125  | 1.832205  |
| C | -3.776421 | -0.315922 | 0.155175  |
| C | -4.909383 | -1.140661 | 0.008857  |
| C | -6.097481 | -0.575958 | -0.494948 |
| C | -6.164440 | 0.789189  | -0.837392 |
| C | -5.035810 | 1.622159  | -0.676204 |
| C | -3.849204 | 1.069173  | -0.184433 |
| H | -4.875561 | -2.206828 | 0.278769  |
| H | -6.988512 | -1.212366 | -0.619419 |
| H | -7.104028 | 1.210065  | -1.229622 |
| H | -5.089709 | 2.691740  | -0.937353 |
| C | -2.511322 | 1.713136  | 0.090597  |
| C | -1.666832 | 0.574558  | 0.603927  |
| C | -2.411039 | -0.587607 | 0.633441  |
| C | -1.820761 | -1.904061 | 1.047237  |
| C | -2.361489 | -3.082515 | 0.410835  |
| N | -2.741643 | -4.045368 | -0.148892 |
| C | -1.685241 | -2.052454 | 2.478259  |
| N | -1.509112 | -2.125130 | 3.640081  |
| H | -2.047732 | 2.152229  | -0.820279 |
| H | -2.585698 | 2.548137  | 0.823296  |
| C | 3.420997  | -2.212369 | 0.017446  |
| C | 4.966883  | -2.414914 | 0.040785  |
| H | 2.930507  | -2.535006 | 0.954658  |
| H | 2.928920  | -2.718674 | -0.834061 |
| H | 5.278812  | -2.892446 | 0.990850  |
| H | 5.282250  | -3.072376 | -0.793715 |
| C | 3.738213  | 0.010062  | 1.023738  |
| H | 3.476771  | 1.075126  | 0.879946  |
| H | 3.233120  | -0.359452 | 1.936343  |
| C | 5.276365  | -0.246842 | 1.028469  |
| H | 5.826218  | 0.710371  | 0.931092  |
| H | 5.585954  | -0.725802 | 1.978797  |
| C | 5.286823  | -0.492404 | -1.361362 |
| H | 5.831942  | 0.468052  | -1.452904 |
| H | 5.608256  | -1.150352 | -2.193060 |
| C | 3.747538  | -0.250479 | -1.423588 |
| H | 3.485863  | 0.819918  | -1.513877 |

---

|   |          |           |           |
|---|----------|-----------|-----------|
| H | 3.252415 | -0.808639 | -2.240313 |
| N | 3.158647 | -0.743238 | -0.135746 |
| N | 5.661228 | -1.125032 | -0.087585 |
| H | 2.049134 | -0.599999 | -0.152739 |

IM9

E= -1491.62654

G= -1491.170255

|   |           |           |           |
|---|-----------|-----------|-----------|
| C | 0.439262  | -2.022031 | -0.383719 |
| H | 0.137258  | -2.063857 | -1.448726 |
| H | 0.145021  | -2.978458 | 0.089081  |
| C | -0.266977 | -0.823220 | 0.276431  |
| C | 0.084595  | 0.461665  | -0.505815 |
| C | 0.010332  | -0.823231 | 1.776833  |
| O | -0.594170 | -1.525070 | 2.573548  |
| O | 1.021959  | 0.002791  | 2.132650  |
| C | 1.379149  | 0.005595  | 3.527233  |
| H | 2.191742  | 0.747153  | 3.630397  |
| H | 0.513433  | 0.295206  | 4.156646  |
| H | 1.737349  | -0.996948 | 3.837501  |
| C | -0.667485 | 1.725691  | -0.100777 |
| C | -0.746627 | 2.784261  | -1.034744 |
| C | -1.342366 | 1.874489  | 1.127559  |
| C | -1.452466 | 3.961902  | -0.742789 |
| H | -0.259464 | 2.672863  | -2.016896 |
| C | -2.058535 | 3.049331  | 1.421716  |
| H | -1.352090 | 1.065298  | 1.870108  |
| C | -2.111968 | 4.100972  | 0.492166  |
| H | -1.498469 | 4.770219  | -1.490050 |
| H | -2.583452 | 3.135465  | 2.386386  |
| H | -2.673202 | 5.020243  | 0.723226  |
| H | -0.262145 | 0.254729  | -1.546611 |
| C | 3.843288  | 0.020822  | -0.623976 |
| C | 5.073075  | -0.663094 | -0.594123 |
| C | 6.260861  | 0.090713  | -0.664168 |
| C | 6.222514  | 1.495759  | -0.763545 |
| C | 4.988944  | 2.182055  | -0.791460 |
| C | 3.804196  | 1.442685  | -0.719492 |
| H | 5.117995  | -1.760536 | -0.516442 |
| H | 7.232833  | -0.427444 | -0.641101 |
| H | 7.164464  | 2.064431  | -0.817367 |
| H | 4.962767  | 3.281375  | -0.863817 |

---

|   |           |           |           |
|---|-----------|-----------|-----------|
| C | 2.362377  | 1.893640  | -0.711052 |
| C | 1.584578  | 0.605458  | -0.601452 |
| C | 2.454478  | -0.450299 | -0.559389 |
| C | 2.011354  | -1.897875 | -0.349189 |
| C | 2.539937  | -2.371499 | 0.955917  |
| N | 2.935604  | -2.714280 | 2.003405  |
| C | 2.574733  | -2.763735 | -1.410379 |
| N | 3.006477  | -3.422406 | -2.276783 |
| H | 2.130242  | 2.561393  | 0.149023  |
| H | 2.092990  | 2.476104  | -1.619906 |
| C | -3.773596 | -2.060043 | -0.765472 |
| C | -5.290712 | -2.120317 | -1.151194 |
| H | -3.121160 | -2.274901 | -1.638230 |
| H | -3.524695 | -2.792569 | 0.031304  |
| H | -5.423577 | -2.366406 | -2.226186 |
| H | -5.826151 | -2.892846 | -0.559382 |
| C | -3.732255 | 0.283835  | -1.317601 |
| H | -3.450749 | 1.285194  | -0.931202 |
| H | -3.081365 | 0.064222  | -2.190277 |
| C | -5.250055 | 0.218593  | -1.698938 |
| H | -5.753534 | 1.190942  | -1.512187 |
| H | -5.386660 | -0.030785 | -2.772741 |
| C | -5.784823 | -0.483137 | 0.536669  |
| H | -6.291392 | 0.488194  | 0.720953  |
| H | -6.315871 | -1.258474 | 1.128796  |
| C | -4.267843 | -0.414414 | 0.920675  |
| H | -3.986505 | 0.593918  | 1.289557  |
| H | -4.010166 | -1.148733 | 1.712471  |
| N | -3.443941 | -0.711061 | -0.266249 |
| N | -5.927786 | -0.815554 | -0.893845 |
| H | -1.368050 | -0.981090 | 0.174849  |

TS8

E= -1491. 616646

G= -1491. 162141

|   |           |           |           |
|---|-----------|-----------|-----------|
| C | -0.679036 | 0.229732  | -2.257180 |
| H | 0.013605  | -0.620254 | -2.390984 |
| H | -0.927146 | 0.622164  | -3.261805 |
| C | 0.021743  | 1.303626  | -1.402241 |
| C | 0.399779  | 0.785751  | -0.008704 |
| C | -0.824683 | 2.585668  | -1.423605 |
| O | -0.875766 | 3.352092  | -2.374187 |



---

|   |           |           |           |
|---|-----------|-----------|-----------|
| O | -1.537595 | 2.755612  | -0.290204 |
| C | -2.420089 | 3.890994  | -0.267249 |
| H | -2.874821 | 3.903116  | 0.739834  |
| H | -1.858599 | 4.830342  | -0.444956 |
| H | -3.209747 | 3.784818  | -1.039036 |
| C | 1.269439  | 1.692414  | 0.797560  |
| C | 1.750532  | 1.340188  | 2.091736  |
| C | 1.752492  | 2.921563  | 0.265223  |
| C | 2.635638  | 2.162269  | 2.804904  |
| H | 1.460804  | 0.384353  | 2.543744  |
| C | 2.641564  | 3.742906  | 0.978061  |
| H | 1.440008  | 3.259238  | -0.733226 |
| C | 3.091662  | 3.375971  | 2.258000  |
| H | 2.981464  | 1.840501  | 3.801027  |
| H | 2.982579  | 4.686680  | 0.521596  |
| H | 3.787703  | 4.020767  | 2.817382  |
| H | 1.368049  | -0.236758 | -0.274287 |
| C | -2.670666 | -1.221249 | 0.807926  |
| C | -3.900068 | -1.879564 | 0.590820  |
| C | -4.563229 | -2.455199 | 1.693607  |
| C | -4.019854 | -2.379326 | 2.990779  |
| C | -2.792242 | -1.710993 | 3.211065  |
| C | -2.131222 | -1.132745 | 2.125602  |
| H | -4.343410 | -1.944718 | -0.415162 |
| H | -5.523690 | -2.972421 | 1.535667  |
| H | -4.554542 | -2.837254 | 3.838115  |
| H | -2.369581 | -1.642373 | 4.227026  |
| C | -0.834589 | -0.360416 | 2.066469  |
| C | -0.672596 | 0.009959  | 0.597774  |
| C | -1.753304 | -0.535207 | -0.093820 |
| C | -1.974071 | -0.343191 | -1.586069 |
| C | -3.134585 | 0.560171  | -1.800996 |
| N | -4.035679 | 1.299012  | -1.926905 |
| C | -2.272078 | -1.644427 | -2.232767 |
| N | -2.459882 | -2.695519 | -2.714671 |
| H | -0.852565 | 0.549521  | 2.706874  |
| H | 0.014106  | -0.974767 | 2.434591  |
| C | 2.164035  | -1.894237 | -1.711823 |
| C | 3.322658  | -2.937824 | -1.820983 |
| H | 1.167407  | -2.376206 | -1.682557 |
| H | 2.180877  | -1.163586 | -2.543914 |
| H | 2.916862  | -3.968856 | -1.866739 |
| H | 3.917950  | -2.763494 | -2.740187 |

---

|   |          |           |           |
|---|----------|-----------|-----------|
| C | 2.277181 | -2.073526 | 0.713339  |
| H | 2.360260 | -1.471253 | 1.637421  |
| H | 1.280631 | -2.556382 | 0.699175  |
| C | 3.444189 | -3.101260 | 0.568559  |
| H | 4.131230 | -3.037093 | 1.436806  |
| H | 3.050474 | -4.136966 | 0.520944  |
| C | 4.779492 | -1.477773 | -0.595845 |
| H | 5.474854 | -1.422947 | 0.266371  |
| H | 5.366807 | -1.300007 | -1.519569 |
| C | 3.641295 | -0.418316 | -0.451379 |
| H | 3.713311 | 0.152622  | 0.493313  |
| H | 3.620479 | 0.303303  | -1.291144 |
| N | 2.331568 | -1.132209 | -0.441797 |
| N | 4.215247 | -2.836325 | -0.656793 |
| H | 0.936411 | 1.565803  | -1.972614 |

IM10

E= -1491.623291

G= -1491.164961

|   |           |           |           |
|---|-----------|-----------|-----------|
| C | -0.819765 | 0.554483  | -2.142156 |
| H | -0.129151 | -0.279722 | -2.363254 |
| H | -1.076069 | 1.046600  | -3.099974 |
| C | -0.107468 | 1.539407  | -1.194141 |
| C | 0.234670  | 0.936281  | 0.161332  |
| C | -0.916229 | 2.843157  | -1.135544 |
| O | -1.008928 | 3.628023  | -2.072079 |
| O | -1.542718 | 3.020723  | 0.043238  |
| C | -2.403552 | 4.172774  | 0.135720  |
| H | -2.807706 | 4.164594  | 1.164021  |
| H | -1.831808 | 5.105221  | -0.045373 |
| H | -3.228833 | 4.094542  | -0.600939 |
| C | 1.283530  | 1.598221  | 0.936359  |
| C | 1.784358  | 1.117487  | 2.190572  |
| C | 1.920652  | 2.783030  | 0.437734  |
| C | 2.838110  | 1.749912  | 2.864586  |
| H | 1.364750  | 0.211751  | 2.641196  |
| C | 2.973906  | 3.409798  | 1.117265  |
| H | 1.588904  | 3.235311  | -0.508087 |
| C | 3.454369  | 2.902339  | 2.339382  |
| H | 3.186965  | 1.326401  | 3.821335  |
| H | 3.424325  | 4.317714  | 0.682207  |
| H | 4.282835  | 3.395360  | 2.871819  |

---

|   |           |           |           |
|---|-----------|-----------|-----------|
| H | 1.487062  | -0.425162 | -0.329483 |
| C | -2.648003 | -1.361142 | 0.728896  |
| C | -3.865939 | -2.034999 | 0.470156  |
| C | -4.443168 | -2.815791 | 1.491896  |
| C | -3.834444 | -2.933613 | 2.756517  |
| C | -2.621453 | -2.250541 | 3.022616  |
| C | -2.044397 | -1.469858 | 2.021427  |
| H | -4.366312 | -1.953215 | -0.507619 |
| H | -5.391688 | -3.342618 | 1.294487  |
| H | -4.303385 | -3.549588 | 3.540340  |
| H | -2.144714 | -2.330252 | 4.014149  |
| C | -0.782998 | -0.634798 | 2.040995  |
| C | -0.706487 | -0.009799 | 0.646826  |
| C | -1.814224 | -0.501543 | -0.084820 |
| C | -2.101622 | -0.085404 | -1.513973 |
| C | -3.246263 | 0.863301  | -1.543147 |
| N | -4.133245 | 1.629508  | -1.497335 |
| C | -2.448888 | -1.265638 | -2.341249 |
| N | -2.668042 | -2.229379 | -2.971106 |
| H | -0.813978 | 0.150593  | 2.828819  |
| H | 0.105755  | -1.260159 | 2.272087  |
| C | 2.034623  | -1.765937 | -1.881302 |
| C | 3.199956  | -2.766821 | -2.136722 |
| H | 1.044921  | -2.256501 | -1.827160 |
| H | 1.994767  | -0.955277 | -2.632332 |
| H | 2.805868  | -3.797406 | -2.235464 |
| H | 3.724949  | -2.511009 | -3.078173 |
| C | 2.314250  | -2.163385 | 0.534949  |
| H | 2.439162  | -1.628384 | 1.493889  |
| H | 1.327822  | -2.663376 | 0.527363  |
| C | 3.495446  | -3.127810 | 0.217828  |
| H | 4.237573  | -3.109290 | 1.040169  |
| H | 3.125349  | -4.167008 | 0.115206  |
| C | 4.712972  | -1.377836 | -0.889778 |
| H | 5.464015  | -1.378131 | -0.075268 |
| H | 5.230375  | -1.104269 | -1.830459 |
| C | 3.580792  | -0.356984 | -0.575480 |
| H | 3.691013  | 0.126089  | 0.412444  |
| H | 3.477717  | 0.429379  | -1.345927 |
| N | 2.281792  | -1.117873 | -0.547521 |
| N | 4.169581  | -2.738634 | -1.030947 |
| H | 0.815672  | 1.822739  | -1.741387 |

---

TS9

E= -1491.592759

G= -1491.136419

|   |           |           |           |
|---|-----------|-----------|-----------|
| C | 0.386280  | -0.889778 | -0.182660 |
| H | 0.526546  | -0.960858 | -1.279496 |
| H | 1.230031  | -1.417157 | 0.301207  |
| C | -0.946334 | -1.564999 | 0.186743  |
| C | -2.135947 | -0.868442 | -0.457367 |
| C | -1.012831 | -1.682123 | 1.721136  |
| O | -0.175013 | -2.278512 | 2.380966  |
| O | -2.072578 | -1.046577 | 2.258360  |
| C | -2.147071 | -1.053084 | 3.696879  |
| H | -3.063295 | -0.492504 | 3.957308  |
| H | -2.210705 | -2.088999 | 4.087226  |
| H | -1.258660 | -0.553445 | 4.133976  |
| C | -3.317598 | -1.665909 | -0.799137 |
| C | -4.302392 | -1.222384 | -1.729558 |
| C | -3.530815 | -2.944365 | -0.202612 |
| C | -5.436227 | -1.994080 | -2.021569 |
| H | -4.159673 | -0.275818 | -2.266603 |
| C | -4.668746 | -3.710177 | -0.492646 |
| H | -2.802495 | -3.347509 | 0.516430  |
| C | -5.636371 | -3.241458 | -1.401074 |
| H | -6.169533 | -1.618578 | -2.753881 |
| H | -4.801551 | -4.687105 | 0.000236  |
| H | -6.529004 | -3.844896 | -1.629734 |
| H | 2.976562  | 0.196057  | -0.755324 |
| C | -1.198726 | 2.646707  | 0.060176  |
| C | -0.406968 | 3.747046  | 0.464797  |
| C | -0.962132 | 5.040181  | 0.398465  |
| C | -2.275203 | 5.241622  | -0.068594 |
| C | -3.062164 | 4.144835  | -0.493578 |
| C | -2.524211 | 2.857912  | -0.429868 |
| H | 0.615674  | 3.600433  | 0.841387  |
| H | -0.359407 | 5.905814  | 0.717939  |
| H | -2.691759 | 6.260828  | -0.109037 |
| H | -4.083199 | 4.308479  | -0.875686 |
| C | -3.118978 | 1.538353  | -0.878292 |
| C | -2.041944 | 0.513558  | -0.534102 |
| C | -0.890857 | 1.233895  | -0.023801 |
| C | 0.386610  | 0.610496  | 0.186663  |
| C | 1.026693  | 0.946661  | 1.444815  |

---

|   |           |           |           |
|---|-----------|-----------|-----------|
| N | 1.542009  | 1.195401  | 2.472384  |
| C | 1.642802  | 1.349590  | -0.952526 |
| N | 1.823942  | 2.440874  | -1.403169 |
| H | -4.087789 | 1.304248  | -0.384388 |
| H | -3.334169 | 1.572513  | -1.969466 |
| C | 4.981548  | 0.585211  | -1.217273 |
| C | 6.353083  | -0.128562 | -1.024702 |
| H | 4.717298  | 0.745870  | -2.279356 |
| H | 4.911182  | 1.551098  | -0.683024 |
| H | 6.853618  | -0.269707 | -2.003046 |
| H | 7.018206  | 0.481524  | -0.381984 |
| C | 3.881978  | -1.621166 | -1.371811 |
| H | 3.079209  | -2.223365 | -0.907545 |
| H | 3.605098  | -1.397266 | -2.419030 |
| C | 5.291819  | -2.273999 | -1.233145 |
| H | 5.204722  | -3.278938 | -0.774399 |
| H | 5.762575  | -2.389927 | -2.229368 |
| C | 5.560778  | -1.273475 | 0.934948  |
| H | 5.432204  | -2.273203 | 1.394932  |
| H | 6.252508  | -0.687460 | 1.571878  |
| C | 4.185171  | -0.547872 | 0.824601  |
| H | 3.343003  | -1.150805 | 1.212501  |
| H | 4.169172  | 0.440628  | 1.319936  |
| N | 3.925374  | -0.312359 | -0.636238 |
| N | 6.168795  | -1.444279 | -0.393522 |
| H | -0.873952 | -2.611867 | -0.173836 |

IM11

E= -1398. 257874

G= -1397. 726376

|   |           |           |           |
|---|-----------|-----------|-----------|
| C | 0.441376  | -0.230740 | -1.262978 |
| H | 0.266124  | -0.331868 | -2.359136 |
| H | 1.526964  | -0.408751 | -1.087317 |
| C | -0.407276 | -1.288349 | -0.528570 |
| C | -1.899857 | -0.972968 | -0.579776 |
| C | 0.126853  | -1.458224 | 0.901325  |
| O | 1.163966  | -2.053292 | 1.168052  |
| O | -0.641318 | -0.857935 | 1.826219  |
| C | -0.183054 | -0.935162 | 3.192635  |
| H | -0.981463 | -0.476432 | 3.803051  |
| H | -0.023931 | -1.989971 | 3.492703  |
| H | 0.761635  | -0.367632 | 3.313841  |

---

|   |           |           |           |
|---|-----------|-----------|-----------|
| C | -2.845899 | -2.102489 | -0.511795 |
| C | -4.162371 | -2.015849 | -1.037730 |
| C | -2.454725 | -3.331330 | 0.086933  |
| C | -5.051499 | -3.096383 | -0.946669 |
| H | -4.482821 | -1.107033 | -1.563702 |
| C | -3.351234 | -4.404679 | 0.190313  |
| H | -1.440052 | -3.457054 | 0.493172  |
| C | -4.655885 | -4.293677 | -0.323359 |
| H | -6.062594 | -3.003990 | -1.374451 |
| H | -3.024444 | -5.339305 | 0.673280  |
| H | -5.357260 | -5.139773 | -0.248581 |
| C | -1.928616 | 2.668023  | -0.106846 |
| C | -1.415121 | 3.954857  | 0.162951  |
| C | -2.306756 | 4.971595  | 0.539570  |
| C | -3.690523 | 4.714977  | 0.644756  |
| C | -4.207107 | 3.433741  | 0.373532  |
| C | -3.323547 | 2.412299  | 0.000520  |
| H | -0.338119 | 4.164122  | 0.088311  |
| H | -1.921172 | 5.980053  | 0.757752  |
| H | -4.373250 | 5.526598  | 0.943135  |
| H | -5.288151 | 3.237596  | 0.454684  |
| C | -3.635098 | 0.976131  | -0.355144 |
| C | -2.261796 | 0.353060  | -0.547603 |
| C | -1.253442 | 1.425529  | -0.501240 |
| C | 0.064107  | 1.173729  | -0.830115 |
| C | 1.057403  | 2.182640  | -0.851795 |
| N | 1.912683  | 2.996329  | -0.876789 |
| H | -4.232893 | 0.454415  | 0.423476  |
| H | -4.243310 | 0.941770  | -1.286343 |
| C | 4.581024  | 0.573774  | -1.436914 |
| C | 6.053024  | 0.541042  | -0.906265 |
| H | 4.516729  | 0.199325  | -2.480739 |
| H | 4.162966  | 1.602041  | -1.422628 |
| H | 6.752377  | 0.155869  | -1.678593 |
| H | 6.399306  | 1.556832  | -0.619924 |
| C | 4.239084  | -1.663629 | -0.619504 |
| H | 3.564894  | -2.290965 | -0.000601 |
| H | 4.176388  | -2.033476 | -1.665060 |
| C | 5.712230  | -1.692366 | -0.090315 |
| H | 5.805546  | -2.344084 | 0.804415  |
| H | 6.410053  | -2.083256 | -0.861271 |
| C | 5.244827  | 0.188519  | 1.326422  |
| H | 5.338761  | -0.460927 | 2.222688  |

---

|   |           |           |           |
|---|-----------|-----------|-----------|
| H | 5.592871  | 1.203745  | 1.613003  |
| C | 3.771704  | 0.220798  | 0.800742  |
| H | 3.103776  | -0.416052 | 1.416177  |
| H | 3.358879  | 1.250772  | 0.808934  |
| N | 3.725707  | -0.279332 | -0.588881 |
| N | 6.148930  | -0.331682 | 0.281397  |
| H | -0.207188 | -2.259181 | -1.023014 |

TS10

E= -1398.231534

G= -1397.796358

|   |           |           |           |
|---|-----------|-----------|-----------|
| C | -0.612234 | 0.296227  | -1.061106 |
| H | -0.897336 | 0.640803  | -2.077540 |
| H | -2.006834 | 0.387101  | -0.549829 |
| C | 0.280448  | 1.238411  | -0.252261 |
| C | 1.767434  | 0.877877  | -0.391942 |
| C | -0.093354 | 1.219974  | 1.240341  |
| O | -0.969168 | 0.542850  | 1.759613  |
| O | 0.692528  | 2.061659  | 1.950050  |
| C | 0.469460  | 2.103410  | 3.371536  |
| H | 1.204262  | 2.824199  | 3.774542  |
| H | -0.560454 | 2.443455  | 3.603554  |
| H | 0.629654  | 1.104508  | 3.825945  |
| C | 2.772351  | 1.935854  | -0.581582 |
| C | 4.083395  | 1.658231  | -1.064400 |
| C | 2.468447  | 3.299494  | -0.304180 |
| C | 5.032280  | 2.675133  | -1.241360 |
| H | 4.358855  | 0.632200  | -1.339481 |
| C | 3.417203  | 4.316083  | -0.485889 |
| H | 1.479326  | 3.565091  | 0.093060  |
| C | 4.710100  | 4.013949  | -0.951226 |
| H | 6.034006  | 2.418050  | -1.622382 |
| H | 3.144204  | 5.358026  | -0.252309 |
| H | 5.456185  | 4.812360  | -1.090271 |
| C | 1.494604  | -2.777413 | 0.041535  |
| C | 0.867226  | -4.032355 | 0.200335  |
| C | 1.642535  | -5.135252 | 0.602575  |
| C | 3.024299  | -4.998623 | 0.847118  |
| C | 3.655937  | -3.745658 | 0.688453  |
| C | 2.892196  | -2.643173 | 0.290265  |
| H | -0.212568 | -4.150102 | 0.021826  |
| H | 1.160390  | -6.117521 | 0.733927  |

---

|   |           |           |           |
|---|-----------|-----------|-----------|
| H | 3.613974  | -5.872977 | 1.165829  |
| H | 4.736958  | -3.639686 | 0.876917  |
| C | 3.333889  | -1.220823 | 0.009903  |
| C | 2.026495  | -0.478427 | -0.248384 |
| C | 0.963810  | -1.470352 | -0.342302 |
| C | -0.246865 | -1.104622 | -0.960533 |
| C | -1.079173 | -2.088449 | -1.567395 |
| N | -1.793494 | -2.876454 | -2.079473 |
| H | 3.931745  | -0.768494 | 0.831060  |
| H | 3.994886  | -1.220915 | -0.885782 |
| C | -3.935325 | 0.373756  | -1.644639 |
| C | -5.475780 | 0.404407  | -1.388341 |
| H | -3.588880 | 1.232591  | -2.252305 |
| H | -3.604467 | -0.561424 | -2.136049 |
| H | -5.943472 | 1.253226  | -1.927168 |
| H | -5.948589 | -0.531526 | -1.748636 |
| C | -3.585324 | 1.736051  | 0.351018  |
| H | -3.037793 | 1.752273  | 1.310907  |
| H | -3.206702 | 2.559231  | -0.286126 |
| C | -5.135103 | 1.785769  | 0.542375  |
| H | -5.388267 | 1.906302  | 1.615227  |
| H | -5.571242 | 2.642558  | -0.010169 |
| C | -5.188757 | -0.602574 | 0.773140  |
| H | -5.405925 | -0.478458 | 1.853518  |
| H | -5.696034 | -1.525748 | 0.426524  |
| C | -3.649087 | -0.700114 | 0.529056  |
| H | -3.051021 | -0.638261 | 1.456005  |
| H | -3.367806 | -1.624061 | -0.011198 |
| N | -3.244017 | 0.452688  | -0.325377 |
| N | -5.757001 | 0.546951  | 0.049066  |
| H | 0.111009  | 2.278076  | -0.599083 |

IM12

E= -1398.240352

G= -1397.796795

|   |           |           |           |
|---|-----------|-----------|-----------|
| C | -0.050335 | -0.790265 | -1.616931 |
| H | 0.427679  | -1.371988 | -2.418108 |
| H | 2.109376  | -1.521664 | 0.092836  |
| C | -1.104484 | -1.410225 | -0.732051 |
| C | -2.267545 | -0.434215 | -0.510891 |
| C | -0.496826 | -1.891367 | 0.602671  |
| O | 0.705258  | -2.057706 | 0.822409  |



---

|   |           |           |           |
|---|-----------|-----------|-----------|
| O | -1.420752 | -2.148831 | 1.533009  |
| C | -0.947009 | -2.609780 | 2.816585  |
| H | -1.850396 | -2.762454 | 3.433718  |
| H | -0.389823 | -3.562121 | 2.710855  |
| H | -0.288745 | -1.849917 | 3.283305  |
| C | -3.638204 | -0.942294 | -0.487241 |
| C | -4.781000 | -0.083314 | -0.526140 |
| C | -3.915702 | -2.343940 | -0.425521 |
| C | -6.088910 | -0.585368 | -0.493065 |
| H | -4.643276 | 1.001358  | -0.616950 |
| C | -5.225485 | -2.843162 | -0.401463 |
| H | -3.084833 | -3.060935 | -0.364967 |
| C | -6.331026 | -1.971651 | -0.428254 |
| H | -6.935136 | 0.120723  | -0.530174 |
| H | -5.384330 | -3.933078 | -0.348395 |
| H | -7.359924 | -2.363921 | -0.400954 |
| C | -0.336714 | 2.674936  | 0.029571  |
| C | 0.786544  | 3.536684  | 0.064768  |
| C | 0.662669  | 4.801609  | 0.672577  |
| C | -0.554999 | 5.221951  | 1.243491  |
| C | -1.683427 | 4.366870  | 1.206782  |
| C | -1.571676 | 3.109969  | 0.609314  |
| H | 1.748521  | 3.228461  | -0.373242 |
| H | 1.537672  | 5.472013  | 0.703813  |
| H | -0.629996 | 6.213321  | 1.718166  |
| H | -2.641731 | 4.693583  | 1.644546  |
| C | -2.627200 | 2.039439  | 0.407214  |
| C | -1.859718 | 0.877176  | -0.220292 |
| C | -0.524907 | 1.332712  | -0.493348 |
| C | 0.287257  | 0.539406  | -1.380080 |
| C | 1.330705  | 1.163121  | -2.131974 |
| N | 2.205253  | 1.674037  | -2.735061 |
| H | -3.151768 | 1.750168  | 1.344860  |
| H | -3.417996 | 2.434070  | -0.269399 |
| C | 3.674258  | -1.367121 | -1.339151 |
| C | 5.189274  | -1.008378 | -1.287382 |
| H | 3.480744  | -2.396618 | -1.693386 |
| H | 3.089983  | -0.658784 | -1.951925 |
| H | 5.797899  | -1.843342 | -1.687789 |
| H | 5.389303  | -0.109555 | -1.903911 |
| C | 3.856256  | -2.285213 | 0.939719  |
| H | 3.399375  | -2.216003 | 1.944237  |
| H | 3.646529  | -3.286379 | 0.518554  |

---

|   |           |           |           |
|---|-----------|-----------|-----------|
| C | 5.371075  | -1.920774 | 0.928398  |
| H | 5.722118  | -1.708489 | 1.957697  |
| H | 5.967340  | -2.764497 | 0.528233  |
| C | 4.853742  | 0.406636  | 0.626655  |
| H | 5.204249  | 0.616423  | 1.656577  |
| H | 5.065049  | 1.296697  | 0.001646  |
| C | 3.326946  | 0.100911  | 0.625603  |
| H | 2.879888  | 0.099054  | 1.637052  |
| H | 2.749026  | 0.788964  | -0.016785 |
| N | 3.146550  | -1.284773 | 0.066164  |
| N | 5.613811  | -0.734543 | 0.093678  |
| H | -1.473480 | -2.341966 | -1.214297 |

TS11

E= -1398.230914

G= -1397.796251

|   |           |           |           |
|---|-----------|-----------|-----------|
| C | -0.430304 | 1.998724  | 1.604772  |
| H | -0.788507 | 2.397778  | 2.564448  |
| C | -1.361269 | 1.299359  | 0.747606  |
| C | -0.929626 | 1.016889  | -0.628503 |
| C | -2.792107 | 1.786009  | 0.943566  |
| O | -3.410208 | 2.459110  | 0.134890  |
| O | -3.268712 | 1.461774  | 2.166407  |
| C | -4.574289 | 1.980261  | 2.486328  |
| H | -4.797520 | 1.631887  | 3.511271  |
| H | -4.580067 | 3.088847  | 2.451621  |
| H | -5.335024 | 1.592491  | 1.778713  |
| C | -1.891137 | 0.392235  | -1.562185 |
| C | -1.802914 | 0.550599  | -2.969717 |
| C | -2.925649 | -0.444158 | -1.060745 |
| C | -2.694710 | -0.103801 | -3.832673 |
| H | -1.049846 | 1.227997  | -3.395135 |
| C | -3.807555 | -1.109902 | -1.925594 |
| H | -3.022492 | -0.597395 | 0.024828  |
| C | -3.699109 | -0.945290 | -3.318081 |
| H | -2.609543 | 0.052521  | -4.920210 |
| H | -4.590862 | -1.761364 | -1.505142 |
| H | -4.398257 | -1.458779 | -3.997126 |
| H | -1.024371 | -1.033810 | 1.334115  |
| C | 2.754407  | 1.353373  | -0.470890 |
| C | 4.029859  | 1.592250  | 0.088189  |
| C | 5.174013  | 1.253298  | -0.657359 |
| C | 5.063000  | 0.683978  | -1.941999 |

---

|   |           |           |           |
|---|-----------|-----------|-----------|
| C | 3.790630  | 0.445866  | -2.506678 |
| C | 2.647640  | 0.775885  | -1.772324 |
| H | 4.137420  | 2.030965  | 1.091025  |
| H | 6.172108  | 1.433584  | -0.226248 |
| H | 5.971699  | 0.422673  | -2.507269 |
| H | 3.700629  | 0.001358  | -3.511373 |
| C | 1.190600  | 0.634790  | -2.151768 |
| C | 0.444033  | 1.090999  | -0.906651 |
| C | 1.402631  | 1.550295  | 0.050336  |
| C | 0.933052  | 2.071830  | 1.291683  |
| C | 1.828943  | 2.670922  | 2.233420  |
| N | 2.563803  | 3.161078  | 3.010692  |
| H | 0.965035  | 1.276348  | -3.030756 |
| H | 0.913693  | -0.398139 | -2.459243 |
| C | -0.753432 | -3.111449 | 2.081822  |
| C | 0.249081  | -4.306480 | 1.994366  |
| H | -0.841724 | -2.701288 | 3.106770  |
| H | -1.766455 | -3.375338 | 1.719342  |
| H | 0.705669  | -4.505599 | 2.985000  |
| H | -0.273949 | -5.227650 | 1.667104  |
| C | 1.117900  | -1.601029 | 1.649255  |
| H | 1.420175  | -0.737983 | 1.024405  |
| H | 1.030867  | -1.261127 | 2.699573  |
| C | 2.072760  | -2.824646 | 1.489706  |
| H | 2.866820  | -2.605908 | 0.747557  |
| H | 2.563456  | -3.061787 | 2.455335  |
| C | 0.733633  | -3.731664 | -0.283474 |
| H | 1.551905  | -3.558980 | -1.011518 |
| H | 0.166352  | -4.626444 | -0.610484 |
| C | -0.197767 | -2.480951 | -0.211439 |
| H | 0.180118  | -1.638196 | -0.817858 |
| H | -1.236530 | -2.698021 | -0.525257 |
| N | -0.240870 | -2.020160 | 1.206119  |
| N | 1.325395  | -4.009475 | 1.035240  |
| H | -1.571621 | -0.124951 | 1.415972  |

IM13

E= -1398. 239427

G= -1397. 798573

|   |           |           |           |
|---|-----------|-----------|-----------|
| C | -1.234351 | -2.461316 | -0.193305 |
| H | -1.597857 | -3.306156 | -0.793733 |
| C | -2.083871 | -1.367788 | 0.050934  |

---

|   |           |           |           |
|---|-----------|-----------|-----------|
| C | -1.633401 | -0.256438 | 0.825319  |
| C | -3.488291 | -1.412822 | -0.472300 |
| O | -4.465937 | -0.945327 | 0.090597  |
| O | -3.548102 | -2.066797 | -1.658696 |
| C | -4.863307 | -2.219985 | -2.227868 |
| H | -4.716165 | -2.722410 | -3.201023 |
| H | -5.506408 | -2.842761 | -1.572976 |
| H | -5.345299 | -1.232643 | -2.375819 |
| C | -2.433529 | 0.989970  | 0.974381  |
| C | -2.755911 | 1.505633  | 2.248377  |
| C | -2.818189 | 1.712069  | -0.178541 |
| C | -3.461553 | 2.714603  | 2.366066  |
| H | -2.468367 | 0.944741  | 3.151217  |
| C | -3.513123 | 2.925277  | -0.057858 |
| H | -2.557804 | 1.318830  | -1.173999 |
| C | -3.839288 | 3.429017  | 1.214966  |
| H | -3.718442 | 3.100985  | 3.365234  |
| H | -3.800565 | 3.482130  | -0.963888 |
| H | -4.387058 | 4.380042  | 1.309854  |
| H | -0.630467 | -0.493892 | -2.974838 |
| C | 1.871396  | -1.083661 | 1.637901  |
| C | 3.085221  | -1.800566 | 1.610948  |
| C | 4.228178  | -1.206260 | 2.170730  |
| C | 4.165771  | 0.080036  | 2.747279  |
| C | 2.954452  | 0.797812  | 2.779032  |
| C | 1.808680  | 0.214054  | 2.224189  |
| H | 3.147735  | -2.798622 | 1.154562  |
| H | 5.186018  | -1.749369 | 2.153450  |
| H | 5.076569  | 0.529732  | 3.173313  |
| H | 2.911012  | 1.803908  | 3.225038  |
| C | 0.411622  | 0.772816  | 2.108162  |
| C | -0.327274 | -0.303224 | 1.343916  |
| C | 0.545999  | -1.395580 | 1.090151  |
| C | 0.081202  | -2.493884 | 0.320477  |
| C | 0.923449  | -3.611441 | 0.023157  |
| N | 1.618235  | -4.526986 | -0.223969 |
| H | -0.038847 | 0.961451  | 3.106791  |
| H | 0.382437  | 1.748669  | 1.576151  |
| C | 2.078670  | 1.400417  | -3.626356 |
| C | 3.283928  | 2.187538  | -3.005082 |
| H | 2.419657  | 0.676302  | -4.396366 |
| H | 1.349271  | 2.087099  | -4.106050 |
| H | 4.248309  | 1.868227  | -3.454505 |

---

|   |           |           |           |
|---|-----------|-----------|-----------|
| H | 3.179477  | 3.280963  | -3.170641 |
| C | 2.321480  | -0.292359 | -1.937177 |
| H | 1.772087  | -0.869535 | -1.167086 |
| H | 2.664825  | -1.009350 | -2.712510 |
| C | 3.518447  | 0.498350  | -1.310317 |
| H | 3.575310  | 0.334135  | -0.214218 |
| H | 4.487702  | 0.181024  | -1.750457 |
| C | 2.085480  | 2.385198  | -0.931548 |
| H | 2.160701  | 2.212217  | 0.162189  |
| H | 1.979089  | 3.478777  | -1.094993 |
| C | 0.881837  | 1.597075  | -1.549865 |
| H | 0.334627  | 1.017986  | -0.779376 |
| H | 0.154148  | 2.280158  | -2.036397 |
| N | 1.376655  | 0.650024  | -2.567613 |
| N | 3.348724  | 1.943723  | -1.551732 |
| H | -1.317026 | -0.860232 | -2.965529 |

TS12

E= -1398.20583

G= -1397.773702

|   |           |           |           |
|---|-----------|-----------|-----------|
| C | -4.123302 | 1.366923  | -0.147853 |
| H | -5.197922 | 1.591974  | -0.200945 |
| C | -3.702145 | 0.023594  | -0.070130 |
| C | -2.320331 | -0.316846 | 0.008880  |
| C | -4.795980 | -1.003972 | -0.061231 |
| O | -5.863387 | -0.862893 | 0.520128  |
| O | -4.489422 | -2.085802 | -0.810072 |
| C | -5.418281 | -3.182177 | -0.749857 |
| H | -4.995436 | -3.974226 | -1.394164 |
| H | -5.518478 | -3.554302 | 0.290582  |
| H | -6.418194 | -2.881047 | -1.123065 |
| C | -1.899999 | -1.737331 | 0.189804  |
| C | -1.132282 | -2.402772 | -0.787515 |
| C | -2.319617 | -2.449398 | 1.336135  |
| C | -0.798851 | -3.756907 | -0.626174 |
| H | -0.800885 | -1.856291 | -1.681284 |
| C | -1.978121 | -3.801244 | 1.501353  |
| H | -2.921477 | -1.933783 | 2.102021  |
| C | -1.218454 | -4.460647 | 0.517405  |
| H | -0.204563 | -4.267682 | -1.400932 |
| H | -2.308546 | -4.343301 | 2.401940  |
| H | -0.954199 | -5.523060 | 0.641833  |

---

|   |           |           |           |
|---|-----------|-----------|-----------|
| C | -0.626233 | 2.974296  | 0.039081  |
| C | -0.475140 | 4.379705  | 0.047692  |
| C | 0.800083  | 4.924839  | 0.258693  |
| C | 1.922396  | 4.083937  | 0.459628  |
| C | 1.792294  | 2.686946  | 0.426939  |
| C | 0.520215  | 2.126601  | 0.204445  |
| H | -1.340548 | 5.043084  | -0.096596 |
| H | 0.928986  | 6.018568  | 0.276113  |
| H | 2.911582  | 4.534474  | 0.641475  |
| H | 2.666872  | 2.036457  | 0.577392  |
| C | 0.102495  | 0.722811  | 0.040638  |
| C | -1.375657 | 0.738244  | -0.005622 |
| C | -1.797651 | 2.113308  | -0.074811 |
| C | -3.182872 | 2.417464  | -0.172302 |
| C | -3.648611 | 3.767282  | -0.266431 |
| N | -4.034348 | 4.875597  | -0.346183 |
| C | 4.528628  | -2.093589 | -0.626384 |
| C | 6.070003  | -2.108111 | -0.394812 |
| H | 3.987012  | -2.814351 | 0.015313  |
| H | 4.250397  | -2.279364 | -1.681434 |
| H | 6.340854  | -2.867285 | 0.366025  |
| H | 6.600765  | -2.360588 | -1.334531 |
| C | 4.326973  | -0.426692 | 1.164506  |
| H | 3.889922  | 0.562111  | 1.396600  |
| H | 3.807232  | -1.191275 | 1.771953  |
| C | 5.875450  | -0.459288 | 1.341784  |
| H | 6.246131  | 0.527540  | 1.684396  |
| H | 6.162984  | -1.215619 | 2.099259  |
| C | 6.206313  | 0.229947  | -0.936282 |
| H | 6.591360  | 1.208476  | -0.585871 |
| H | 6.726006  | -0.024098 | -1.881756 |
| C | 4.665393  | 0.300369  | -1.161534 |
| H | 4.233999  | 1.282551  | -0.890989 |
| H | 4.370051  | 0.059802  | -2.200796 |
| N | 4.025089  | -0.724366 | -0.273533 |
| N | 6.535839  | -0.792227 | 0.069610  |
| H | 2.911747  | -0.712467 | -0.447503 |
| O | 0.841107  | -0.325955 | 0.601509  |
| O | 1.469193  | -0.815866 | -0.706270 |
| H | 0.708060  | 0.201054  | -1.072928 |

IM14

---

E= -1398. 251304

G= -1397. 825095

|   |           |           |           |
|---|-----------|-----------|-----------|
| C | 0.951442  | 2.407482  | -1.198992 |
| H | 1.293927  | 3.024829  | -2.041138 |
| C | 1.851903  | 1.482870  | -0.609811 |
| C | 1.448509  | 0.636078  | 0.455900  |
| C | 3.228069  | 1.460008  | -1.196090 |
| O | 3.476845  | 1.617469  | -2.385320 |
| O | 4.187319  | 1.297834  | -0.253413 |
| C | 5.530508  | 1.147928  | -0.741807 |
| H | 6.166439  | 1.009306  | 0.151454  |
| H | 5.612916  | 0.261537  | -1.404237 |
| H | 5.855123  | 2.047449  | -1.303588 |
| C | 2.317052  | -0.450722 | 0.981265  |
| C | 2.547917  | -0.588290 | 2.369086  |
| C | 2.904868  | -1.391454 | 0.101645  |
| C | 3.353430  | -1.628296 | 2.862091  |
| H | 2.107785  | 0.142673  | 3.064602  |
| C | 3.704332  | -2.434169 | 0.595010  |
| H | 2.726109  | -1.304087 | -0.981671 |
| C | 3.932963  | -2.556481 | 1.978158  |
| H | 3.533523  | -1.711545 | 3.945949  |
| H | 4.150361  | -3.158262 | -0.105525 |
| H | 4.561502  | -3.373940 | 2.365912  |
| C | -2.064267 | 1.619317  | 1.059161  |
| C | -3.313384 | 2.270471  | 0.898931  |
| C | -4.409323 | 1.852611  | 1.660730  |
| C | -4.279016 | 0.781517  | 2.593049  |
| C | -3.062539 | 0.118843  | 2.772021  |
| C | -1.928966 | 0.516979  | 2.008085  |
| H | -3.426242 | 3.096071  | 0.179302  |
| H | -5.382811 | 2.354725  | 1.542394  |
| H | -5.157918 | 0.472491  | 3.182846  |
| H | -2.979188 | -0.711296 | 3.492898  |
| C | -0.602665 | -0.019561 | 1.920981  |
| C | 0.117213  | 0.762438  | 0.958528  |
| C | -0.794673 | 1.760276  | 0.396473  |
| C | -0.356392 | 2.558864  | -0.698726 |
| C | -1.236645 | 3.498489  | -1.322011 |
| N | -1.970588 | 4.263360  | -1.833463 |
| H | -0.191695 | -0.821324 | 2.547124  |
| C | -2.126346 | -2.832426 | 0.066725  |
| C | -2.580206 | -3.663784 | -1.169761 |

---

|   |           |           |           |
|---|-----------|-----------|-----------|
| H | -1.303747 | -3.306104 | 0.634582  |
| H | -2.953991 | -2.596069 | 0.761733  |
| H | -1.985541 | -4.595530 | -1.248403 |
| H | -3.647570 | -3.944705 | -1.072102 |
| C | -0.447303 | -1.739188 | -1.378686 |
| H | -0.068533 | -0.740198 | -1.663204 |
| H | 0.335768  | -2.265159 | -0.801783 |
| C | -0.982279 | -2.563005 | -2.588198 |
| H | -0.868288 | -1.985647 | -3.526966 |
| H | -0.410568 | -3.506423 | -2.692407 |
| C | -3.190670 | -1.647188 | -2.325051 |
| H | -3.092967 | -1.099078 | -3.283070 |
| H | -4.257432 | -1.913105 | -2.187238 |
| C | -2.695093 | -0.757355 | -1.145228 |
| H | -2.253404 | 0.198296  | -1.480232 |
| H | -3.479172 | -0.543791 | -0.395936 |
| N | -1.603178 | -1.517657 | -0.443956 |
| N | -2.405695 | -2.888851 | -2.407683 |
| H | -1.252099 | -0.965003 | 0.403408  |

3aa

E= -1397.077938

G= -1396.660891

|   |           |           |           |
|---|-----------|-----------|-----------|
| C | -2.531314 | 2.371410  | 0.933786  |
| H | -3.125855 | 3.052019  | 1.560276  |
| C | -3.045398 | 1.103320  | 0.621818  |
| C | -2.289531 | 0.182762  | -0.170363 |
| C | -4.412313 | 0.788921  | 1.160297  |
| O | -4.807601 | 1.127129  | 2.266460  |
| O | -5.167014 | 0.133628  | 0.255057  |
| C | -6.465017 | -0.299839 | 0.703675  |
| H | -6.923617 | -0.821859 | -0.155447 |
| H | -6.369083 | -0.995428 | 1.562176  |
| H | -7.090843 | 0.565045  | 1.003296  |
| C | -2.748983 | -1.214262 | -0.400793 |
| C | -2.885341 | -1.731788 | -1.706543 |
| C | -3.047237 | -2.044476 | 0.703348  |
| C | -3.314134 | -3.054625 | -1.903301 |
| H | -2.677565 | -1.086200 | -2.573521 |
| C | -3.468780 | -3.367874 | 0.504422  |
| H | -2.931783 | -1.649923 | 1.725557  |
| C | -3.604325 | -3.877332 | -0.800214 |



---

|   |           |           |           |
|---|-----------|-----------|-----------|
| H | -3.425637 | -3.444349 | -2.927643 |
| H | -3.691337 | -4.006381 | 1.374064  |
| H | -3.937137 | -4.915702 | -0.956773 |
| C | 0.798769  | 2.045834  | -1.002105 |
| C | 1.715871  | 3.112962  | -1.026338 |
| C | 2.917442  | 2.948368  | -1.740758 |
| C | 3.191177  | 1.750797  | -2.430431 |
| C | 2.272964  | 0.680229  | -2.407974 |
| C | 1.088612  | 0.829473  | -1.680350 |
| H | 1.507579  | 4.059471  | -0.507275 |
| H | 3.647507  | 3.772403  | -1.768864 |
| H | 4.132058  | 1.650052  | -2.993942 |
| H | 2.484295  | -0.255720 | -2.943285 |
| C | -0.017381 | -0.183856 | -1.441663 |
| C | -1.046774 | 0.621348  | -0.657176 |
| C | -0.524883 | 1.909294  | -0.370756 |
| C | -1.277921 | 2.798810  | 0.436414  |
| C | -0.802302 | 4.108907  | 0.760288  |
| N | -0.413100 | 5.185901  | 1.025254  |
| C | 3.507479  | -2.455203 | 1.308398  |
| C | 4.688462  | -2.170298 | 2.292395  |
| H | 2.533172  | -2.506631 | 1.835654  |
| H | 3.647337  | -3.408544 | 0.758598  |
| H | 4.324559  | -2.086000 | 3.337849  |
| H | 5.439866  | -2.986944 | 2.260631  |
| C | 3.195749  | -0.075083 | 1.011481  |
| H | 3.112494  | 0.720286  | 0.246134  |
| H | 2.221156  | -0.145480 | 1.533940  |
| C | 4.380230  | 0.192245  | 1.995799  |
| H | 4.902124  | 1.138399  | 1.740687  |
| H | 4.018749  | 0.277311  | 3.042042  |
| C | 5.875166  | -1.014950 | 0.554334  |
| H | 6.399601  | -0.069142 | 0.303542  |
| H | 6.623212  | -1.834719 | 0.524214  |
| C | 4.702141  | -1.286922 | -0.442588 |
| H | 4.603762  | -0.477136 | -1.192793 |
| H | 4.833680  | -2.244553 | -0.987338 |
| N | 3.426220  | -1.361273 | 0.308663  |
| N | 5.358493  | -0.908529 | 1.930671  |
| H | 2.212171  | -1.755646 | -0.681145 |
| O | 0.367391  | -1.259075 | -0.570376 |
| O | 1.386078  | -2.047751 | -1.252161 |
| H | -0.417144 | -0.597812 | -2.395212 |

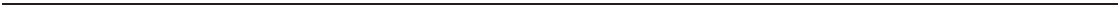

## 6. X-ray crystal structure of compound 3ba

Crystal data for mo\_hd\_fjy1\_0m:  $C_{23}H_{17}NO_3$ ,  $M = 355.38$ ,  $a = 13.0762(14)$  Å,  $b = 6.6583(7)$  Å,  $c = 21.175(2)$  Å,  $\alpha = 90^\circ$ ,  $\beta = 106.715(2)^\circ$ ,  $\gamma = 90^\circ$ ,  $V = 1765.7(3)$  Å<sup>3</sup>,  $T = 100(2)$  K, space group  $P21/c$ ,  $Z = 4$ ,  $\mu(\text{MoK}\alpha) = 0.089$  mm<sup>-1</sup>, 19366 reflections measured, 5260 independent reflections ( $R_{int} = 0.0386$ ). The final  $R_I$  values were 0.0479 ( $I > 2\sigma(I)$ ). The final  $wR(F^2)$  values were 0.1326 ( $I > 2\sigma(I)$ ). The final  $R_I$  values were 0.0693 (all data). The final  $wR(F^2)$  values were 0.1474 (all data). The goodness of fit on  $F^2$  was 1.033.

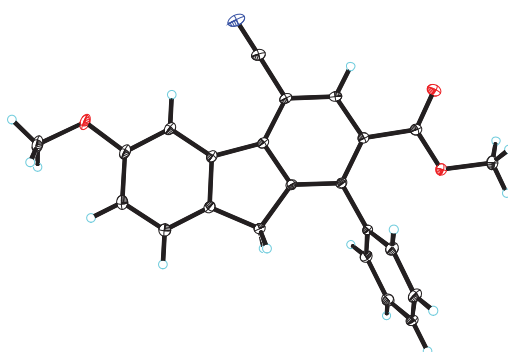

View of a molecule of hd\_fjy1 with the atom-labelling scheme.

Displacement ellipsoids are drawn at the 30% probability level.

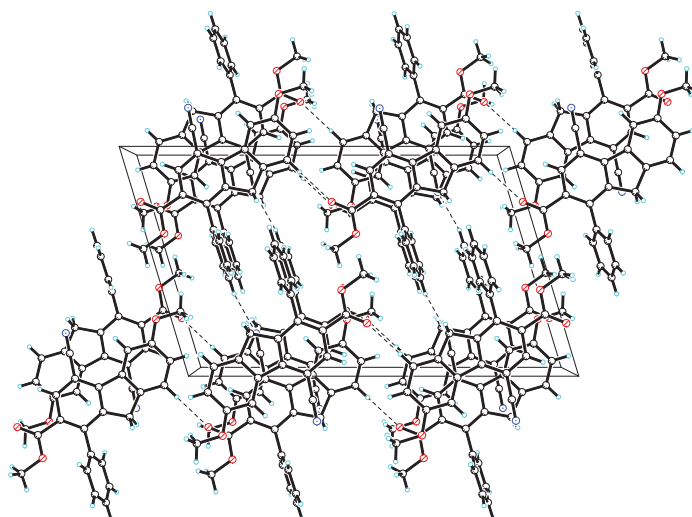

View of the pack drawing of hd\_fjy1.

---

Hydrogen-bonds are shown as dashed lines.

Table S2. Crystal data and structure refinement for mo\_hd\_fjy1\_0m.

|                                   |                                                  |                  |
|-----------------------------------|--------------------------------------------------|------------------|
| Identification code               | mo_hd_fjy1_0m                                    |                  |
| Empirical formula                 | C <sub>23</sub> H <sub>17</sub> N O <sub>3</sub> |                  |
| Formula weight                    | 355.38                                           |                  |
| Temperature                       | 100(2) K                                         |                  |
| Wavelength                        | 0.71073 Å                                        |                  |
| Crystal system                    | Monoclinic                                       |                  |
| Space group                       | P2 <sub>1</sub> /c                               |                  |
| Unit cell dimensions              | a = 13.0762(14) Å                                | α = 90°.         |
|                                   | b = 6.6583(7) Å                                  | β = 106.715(2)°. |
|                                   | c = 21.175(2) Å                                  | γ = 90°.         |
| Volume                            | 1765.7(3) Å <sup>3</sup>                         |                  |
| Z                                 | 4                                                |                  |
| Density (calculated)              | 1.337 Mg/m <sup>3</sup>                          |                  |
| Absorption coefficient            | 0.089 mm <sup>-1</sup>                           |                  |
| F(000)                            | 744                                              |                  |
| Crystal size                      | 0.670 x 0.350 x 0.180 mm <sup>3</sup>            |                  |
| Theta range for data collection   | 1.626 to 31.139°.                                |                  |
| Index ranges                      | -18 ≤ h ≤ 18, -9 ≤ k ≤ 9, -30 ≤ l ≤ 30           |                  |
| Reflections collected             | 19366                                            |                  |
| Independent reflections           | 5260 [R(int) = 0.0386]                           |                  |
| Completeness to theta = 25.242°   | 99.7 %                                           |                  |
| Absorption correction             | Semi-empirical from equivalents                  |                  |
| Refinement method                 | Full-matrix least-squares on F <sup>2</sup>      |                  |
| Data / restraints / parameters    | 5260 / 0 / 246                                   |                  |
| Goodness-of-fit on F <sup>2</sup> | 1.033                                            |                  |
| Final R indices [I > 2σ(I)]       | R1 = 0.0479, wR2 = 0.1326                        |                  |
| R indices (all data)              | R1 = 0.0693, wR2 = 0.1474                        |                  |
| Extinction coefficient            | n/a                                              |                  |
| Largest diff. peak and hole       | 0.715 and -0.252 e.Å <sup>-3</sup>               |                  |

Table S3. Atomic coordinates ( $\times 10^4$ ) and equivalent isotropic displacement parameters ( $\text{\AA}^2 \times 10^3$ )

for mo\_hd\_fjy1\_0m.  $U(\text{eq})$  is defined as one third of the trace of the orthogonalized  $U^{ij}$  tensor.

|       | x        | y       | z       | $U(\text{eq})$ |
|-------|----------|---------|---------|----------------|
| O(1)  | 3774(1)  | 2909(1) | 4596(1) | 28(1)          |
| O(2)  | -2422(1) | 2664(1) | 515(1)  | 28(1)          |
| O(3)  | 2364(1)  | 2503(1) | 4982(1) | 28(1)          |
| N(1)  | -1802(1) | 2740(2) | 2989(1) | 29(1)          |
| C(1)  | 4452(1)  | 2767(2) | 5267(1) | 33(1)          |
| C(2)  | 2729(1)  | 2696(2) | 4521(1) | 19(1)          |
| C(3)  | 2056(1)  | 2726(2) | 3819(1) | 17(1)          |
| C(4)  | 954(1)   | 2729(2) | 3734(1) | 18(1)          |
| C(5)  | 225(1)   | 2748(2) | 3109(1) | 17(1)          |
| C(6)  | 600(1)   | 2759(2) | 2552(1) | 16(1)          |
| C(7)  | 40(1)    | 2743(2) | 1841(1) | 17(1)          |
| C(8)  | -1042(1) | 2725(2) | 1502(1) | 19(1)          |
| C(9)  | -1340(1) | 2697(2) | 816(1)  | 22(1)          |
| C(10) | -2761(1) | 2605(2) | -190(1) | 31(1)          |
| C(11) | 2448(1)  | 2738(2) | 3263(1) | 16(1)          |
| C(12) | 1707(1)  | 2761(2) | 2639(1) | 16(1)          |
| C(13) | 1928(1)  | 2743(2) | 1978(1) | 18(1)          |
| C(14) | 822(1)   | 2737(2) | 1500(1) | 19(1)          |
| C(15) | 514(1)   | 2710(2) | 818(1)  | 24(1)          |
| C(16) | -572(1)  | 2691(2) | 474(1)  | 26(1)          |
| C(17) | 3600(1)  | 2695(2) | 3289(1) | 18(1)          |
| C(18) | 4161(1)  | 889(2)  | 3384(1) | 25(1)          |
| C(19) | 5218(1)  | 846(2)  | 3370(1) | 34(1)          |
| C(20) | 5721(1)  | 2596(2) | 3266(1) | 36(1)          |
| C(21) | 5166(1)  | 4388(2) | 3169(1) | 32(1)          |
| C(22) | 4105(1)  | 4449(2) | 3177(1) | 25(1)          |
| C(23) | -902(1)  | 2744(2) | 3045(1) | 21(1)          |

---

Table S4. Bond lengths [ $\text{\AA}$ ] and angles [ $^\circ$ ] for mo\_hd\_fjy1\_0m.

---

|             |            |
|-------------|------------|
| O(1)-C(2)   | 1.3371(14) |
| O(1)-C(1)   | 1.4451(15) |
| O(2)-C(9)   | 1.3737(14) |
| O(2)-C(10)  | 1.4318(16) |
| O(3)-C(2)   | 1.2085(14) |
| N(1)-C(23)  | 1.1487(16) |
| C(1)-H(4)   | 0.9800     |
| C(1)-H(1)   | 0.9800     |
| C(1)-H(5)   | 0.9800     |
| C(2)-C(3)   | 1.4946(16) |
| C(3)-C(4)   | 1.4002(16) |
| C(3)-C(11)  | 1.4131(15) |
| C(4)-C(5)   | 1.3901(16) |
| C(4)-H(15)  | 0.9500     |
| C(5)-C(6)   | 1.4012(15) |
| C(5)-C(23)  | 1.4405(16) |
| C(6)-C(12)  | 1.4060(15) |
| C(6)-C(7)   | 1.4723(15) |
| C(7)-C(8)   | 1.3902(16) |
| C(7)-C(14)  | 1.4112(16) |
| C(8)-C(9)   | 1.3925(17) |
| C(8)-H(16)  | 0.9500     |
| C(9)-C(16)  | 1.3978(19) |
| C(10)-H(17) | 0.9800     |
| C(10)-H(3)  | 0.9800     |
| C(10)-H(2)  | 0.9800     |
| C(11)-C(12) | 1.3960(15) |
| C(11)-C(17) | 1.4920(15) |
| C(12)-C(13) | 1.5085(15) |
| C(13)-C(14) | 1.5068(16) |
| C(13)-H(9)  | 0.9900     |
| C(13)-H(8)  | 0.9900     |
| C(14)-C(15) | 1.3832(16) |
| C(15)-C(16) | 1.3968(18) |
| C(15)-H(7)  | 0.9500     |

---

|                 |            |
|-----------------|------------|
| C(16)-H(6)      | 0.9500     |
| C(17)-C(18)     | 1.3923(16) |
| C(17)-C(22)     | 1.3950(16) |
| C(18)-C(19)     | 1.3911(16) |
| C(18)-H(14)     | 0.9500     |
| C(19)-C(20)     | 1.386(2)   |
| C(19)-H(13)     | 0.9500     |
| C(20)-C(21)     | 1.381(2)   |
| C(20)-H(12)     | 0.9500     |
| C(21)-C(22)     | 1.3934(16) |
| C(21)-H(11)     | 0.9500     |
| C(22)-H(10)     | 0.9500     |
|                 |            |
| C(2)-O(1)-C(1)  | 115.30(10) |
| C(9)-O(2)-C(10) | 116.92(11) |
| O(1)-C(1)-H(4)  | 109.5      |
| O(1)-C(1)-H(1)  | 109.5      |
| H(4)-C(1)-H(1)  | 109.5      |
| O(1)-C(1)-H(5)  | 109.5      |
| H(4)-C(1)-H(5)  | 109.5      |
| H(1)-C(1)-H(5)  | 109.5      |
| O(3)-C(2)-O(1)  | 122.80(11) |
| O(3)-C(2)-C(3)  | 123.28(11) |
| O(1)-C(2)-C(3)  | 113.92(9)  |
| C(4)-C(3)-C(11) | 119.95(10) |
| C(4)-C(3)-C(2)  | 114.68(10) |
| C(11)-C(3)-C(2) | 125.37(10) |
| C(5)-C(4)-C(3)  | 121.42(10) |
| C(5)-C(4)-H(15) | 119.3      |
| C(3)-C(4)-H(15) | 119.3      |
| C(4)-C(5)-C(6)  | 119.40(10) |
| C(4)-C(5)-C(23) | 119.48(10) |
| C(6)-C(5)-C(23) | 121.12(10) |
| C(5)-C(6)-C(12) | 119.10(10) |
| C(5)-C(6)-C(7)  | 132.01(10) |
| C(12)-C(6)-C(7) | 108.88(9)  |
| C(8)-C(7)-C(14) | 121.04(11) |

---

|                   |            |
|-------------------|------------|
| C(8)-C(7)-C(6)    | 131.33(10) |
| C(14)-C(7)-C(6)   | 107.63(10) |
| C(7)-C(8)-C(9)    | 118.49(11) |
| C(7)-C(8)-H(16)   | 120.8      |
| C(9)-C(8)-H(16)   | 120.8      |
| O(2)-C(9)-C(8)    | 115.21(11) |
| O(2)-C(9)-C(16)   | 123.89(12) |
| C(8)-C(9)-C(16)   | 120.90(11) |
| O(2)-C(10)-H(17)  | 109.5      |
| O(2)-C(10)-H(3)   | 109.5      |
| H(17)-C(10)-H(3)  | 109.5      |
| O(2)-C(10)-H(2)   | 109.5      |
| H(17)-C(10)-H(2)  | 109.5      |
| H(3)-C(10)-H(2)   | 109.5      |
| C(12)-C(11)-C(3)  | 118.00(10) |
| C(12)-C(11)-C(17) | 117.05(10) |
| C(3)-C(11)-C(17)  | 124.95(10) |
| C(11)-C(12)-C(6)  | 122.14(10) |
| C(11)-C(12)-C(13) | 127.74(10) |
| C(6)-C(12)-C(13)  | 110.11(9)  |
| C(14)-C(13)-C(12) | 102.68(9)  |
| C(14)-C(13)-H(9)  | 111.2      |
| C(12)-C(13)-H(9)  | 111.2      |
| C(14)-C(13)-H(8)  | 111.2      |
| C(12)-C(13)-H(8)  | 111.2      |
| H(9)-C(13)-H(8)   | 109.1      |
| C(15)-C(14)-C(7)  | 119.81(11) |
| C(15)-C(14)-C(13) | 129.48(11) |
| C(7)-C(14)-C(13)  | 110.70(10) |
| C(14)-C(15)-C(16) | 119.55(12) |
| C(14)-C(15)-H(7)  | 120.2      |
| C(16)-C(15)-H(7)  | 120.2      |
| C(15)-C(16)-C(9)  | 120.20(12) |
| C(15)-C(16)-H(6)  | 119.9      |
| C(9)-C(16)-H(6)   | 119.9      |
| C(18)-C(17)-C(22) | 119.52(11) |
| C(18)-C(17)-C(11) | 120.42(10) |



---

|                   |            |
|-------------------|------------|
| C(22)-C(17)-C(11) | 119.94(10) |
| C(19)-C(18)-C(17) | 119.97(12) |
| C(19)-C(18)-H(14) | 120.0      |
| C(17)-C(18)-H(14) | 120.0      |
| C(20)-C(19)-C(18) | 120.41(13) |
| C(20)-C(19)-H(13) | 119.8      |
| C(18)-C(19)-H(13) | 119.8      |
| C(21)-C(20)-C(19) | 119.75(12) |
| C(21)-C(20)-H(12) | 120.1      |
| C(19)-C(20)-H(12) | 120.1      |
| C(20)-C(21)-C(22) | 120.42(13) |
| C(20)-C(21)-H(11) | 119.8      |
| C(22)-C(21)-H(11) | 119.8      |
| C(21)-C(22)-C(17) | 119.92(12) |
| C(21)-C(22)-H(10) | 120.0      |
| C(17)-C(22)-H(10) | 120.0      |
| N(1)-C(23)-C(5)   | 179.49(14) |

---

Symmetry transformations used to generate equivalent atoms:

Table S5. Anisotropic displacement parameters ( $\text{\AA}^2 \times 10^3$ ) for mo\_hd\_fjy1\_0m. The anisotropic displacement factor exponent takes the form:  $-2\pi^2 [ h^2 a^{*2} U^{11} + \dots + 2 h k a^* b^* U^{12} ]$

|       | $U^{11}$ | $U^{22}$ | $U^{33}$ | $U^{23}$ | $U^{13}$ | $U^{12}$ |
|-------|----------|----------|----------|----------|----------|----------|
| O(1)  | 16(1)    | 51(1)    | 16(1)    | 0(1)     | 3(1)     | -3(1)    |
| O(2)  | 15(1)    | 38(1)    | 24(1)    | 3(1)     | -5(1)    | -1(1)    |
| O(3)  | 26(1)    | 42(1)    | 20(1)    | 1(1)     | 11(1)    | -2(1)    |
| N(1)  | 18(1)    | 30(1)    | 43(1)    | -1(1)    | 13(1)    | -1(1)    |
| C(1)  | 20(1)    | 58(1)    | 18(1)    | 1(1)     | 0(1)     | -2(1)    |
| C(2)  | 16(1)    | 23(1)    | 18(1)    | 0(1)     | 6(1)     | -1(1)    |
| C(3)  | 15(1)    | 19(1)    | 17(1)    | 0(1)     | 5(1)     | -1(1)    |
| C(4)  | 16(1)    | 20(1)    | 21(1)    | 0(1)     | 9(1)     | -1(1)    |
| C(5)  | 12(1)    | 16(1)    | 22(1)    | 0(1)     | 6(1)     | 0(1)     |
| C(6)  | 12(1)    | 15(1)    | 19(1)    | 1(1)     | 4(1)     | 0(1)     |
| C(7)  | 14(1)    | 17(1)    | 19(1)    | 1(1)     | 2(1)     | -1(1)    |
| C(8)  | 13(1)    | 19(1)    | 22(1)    | 2(1)     | 2(1)     | 0(1)     |
| C(9)  | 15(1)    | 23(1)    | 24(1)    | 2(1)     | -1(1)    | 0(1)     |
| C(10) | 23(1)    | 37(1)    | 24(1)    | 3(1)     | -6(1)    | -3(1)    |
| C(11) | 13(1)    | 17(1)    | 18(1)    | 1(1)     | 4(1)     | -1(1)    |
| C(12) | 13(1)    | 17(1)    | 17(1)    | 0(1)     | 5(1)     | 0(1)     |
| C(13) | 14(1)    | 24(1)    | 17(1)    | 0(1)     | 5(1)     | 0(1)     |
| C(14) | 14(1)    | 22(1)    | 19(1)    | 1(1)     | 4(1)     | -1(1)    |
| C(15) | 19(1)    | 34(1)    | 19(1)    | 1(1)     | 5(1)     | 0(1)     |
| C(16) | 22(1)    | 33(1)    | 18(1)    | 1(1)     | 1(1)     | -1(1)    |
| C(17) | 11(1)    | 29(1)    | 14(1)    | -1(1)    | 3(1)     | -1(1)    |
| C(18) | 19(1)    | 34(1)    | 22(1)    | 1(1)     | 5(1)     | 5(1)     |
| C(19) | 18(1)    | 55(1)    | 26(1)    | -2(1)    | 4(1)     | 12(1)    |
| C(20) | 13(1)    | 76(1)    | 18(1)    | -5(1)    | 4(1)     | -1(1)    |
| C(21) | 19(1)    | 57(1)    | 20(1)    | -1(1)    | 5(1)     | -14(1)   |
| C(22) | 17(1)    | 34(1)    | 22(1)    | 1(1)     | 5(1)     | -6(1)    |
| C(23) | 18(1)    | 20(1)    | 26(1)    | 0(1)     | 9(1)     | 0(1)     |

Table S6. Hydrogen coordinates ( $\times 10^4$ ) and isotropic displacement parameters ( $\text{\AA}^2 \times 10^{-3}$ ) for mo\_hd\_fjy1\_0m.

|       | x     | y    | z    | U(eq) |
|-------|-------|------|------|-------|
| H(4)  | 4219  | 3747 | 5542 | 50    |
| H(1)  | 5193  | 3048 | 5278 | 50    |
| H(5)  | 4405  | 1411 | 5436 | 50    |
| H(15) | 698   | 2718 | 4111 | 22    |
| H(16) | -1565 | 2732 | 1734 | 22    |
| H(17) | -2490 | 3791 | -364 | 46    |
| H(3)  | -3543 | 2594 | -347 | 46    |
| H(2)  | -2482 | 1389 | -343 | 46    |
| H(9)  | 2332  | 3951 | 1919 | 22    |
| H(8)  | 2332  | 1528 | 1925 | 22    |
| H(7)  | 1036  | 2704 | 586  | 29    |
| H(6)  | -788  | 2673 | 5    | 31    |
| H(14) | 3822  | -314 | 3458 | 30    |
| H(13) | 5597  | -389 | 3432 | 40    |
| H(12) | 6445  | 2562 | 3261 | 43    |
| H(11) | 5510  | 5586 | 3096 | 38    |
| H(10) | 3725  | 5684 | 3106 | 30    |

Table S7. Torsion angles [°] for mo\_hd\_fjy1\_0m.

|                         |             |
|-------------------------|-------------|
| C(1)-O(1)-C(2)-O(3)     | 3.74(16)    |
| C(1)-O(1)-C(2)-C(3)     | -176.50(10) |
| O(3)-C(2)-C(3)-C(4)     | 6.50(16)    |
| O(1)-C(2)-C(3)-C(4)     | -173.26(9)  |
| O(3)-C(2)-C(3)-C(11)    | -173.05(11) |
| O(1)-C(2)-C(3)-C(11)    | 7.19(15)    |
| C(11)-C(3)-C(4)-C(5)    | -0.15(15)   |
| C(2)-C(3)-C(4)-C(5)     | -179.72(9)  |
| C(3)-C(4)-C(5)-C(6)     | 0.15(15)    |
| C(3)-C(4)-C(5)-C(23)    | 179.84(9)   |
| C(4)-C(5)-C(6)-C(12)    | -0.30(15)   |
| C(23)-C(5)-C(6)-C(12)   | -179.99(9)  |
| C(4)-C(5)-C(6)-C(7)     | 178.76(10)  |
| C(23)-C(5)-C(6)-C(7)    | -0.93(17)   |
| C(5)-C(6)-C(7)-C(8)     | 0.52(19)    |
| C(12)-C(6)-C(7)-C(8)    | 179.65(10)  |
| C(5)-C(6)-C(7)-C(14)    | -179.18(11) |
| C(12)-C(6)-C(7)-C(14)   | -0.05(11)   |
| C(14)-C(7)-C(8)-C(9)    | 0.15(15)    |
| C(6)-C(7)-C(8)-C(9)     | -179.51(10) |
| C(10)-O(2)-C(9)-C(8)    | -179.12(10) |
| C(10)-O(2)-C(9)-C(16)   | 0.46(16)    |
| C(7)-C(8)-C(9)-O(2)     | 179.47(9)   |
| C(7)-C(8)-C(9)-C(16)    | -0.13(16)   |
| C(4)-C(3)-C(11)-C(12)   | 0.29(15)    |
| C(2)-C(3)-C(11)-C(12)   | 179.82(10)  |
| C(4)-C(3)-C(11)-C(17)   | -178.69(9)  |
| C(2)-C(3)-C(11)-C(17)   | 0.83(16)    |
| C(3)-C(11)-C(12)-C(6)   | -0.45(15)   |
| C(17)-C(11)-C(12)-C(6)  | 178.61(9)   |
| C(3)-C(11)-C(12)-C(13)  | -178.92(10) |
| C(17)-C(11)-C(12)-C(13) | 0.15(15)    |
| C(5)-C(6)-C(12)-C(11)   | 0.46(15)    |
| C(7)-C(6)-C(12)-C(11)   | -178.80(9)  |
| C(5)-C(6)-C(12)-C(13)   | 179.17(9)   |

---

|                         |             |
|-------------------------|-------------|
| C(7)-C(6)-C(12)-C(13)   | -0.09(11)   |
| C(11)-C(12)-C(13)-C(14) | 178.80(10)  |
| C(6)-C(12)-C(13)-C(14)  | 0.18(11)    |
| C(8)-C(7)-C(14)-C(15)   | -0.12(16)   |
| C(6)-C(7)-C(14)-C(15)   | 179.61(10)  |
| C(8)-C(7)-C(14)-C(13)   | -179.56(9)  |
| C(6)-C(7)-C(14)-C(13)   | 0.17(12)    |
| C(12)-C(13)-C(14)-C(15) | -179.58(11) |
| C(12)-C(13)-C(14)-C(7)  | -0.21(11)   |
| C(7)-C(14)-C(15)-C(16)  | 0.08(17)    |
| C(13)-C(14)-C(15)-C(16) | 179.40(10)  |
| C(14)-C(15)-C(16)-C(9)  | -0.06(17)   |
| O(2)-C(9)-C(16)-C(15)   | -179.48(10) |
| C(8)-C(9)-C(16)-C(15)   | 0.08(17)    |
| C(12)-C(11)-C(17)-C(18) | -98.17(12)  |
| C(3)-C(11)-C(17)-C(18)  | 80.82(14)   |
| C(12)-C(11)-C(17)-C(22) | 77.72(13)   |
| C(3)-C(11)-C(17)-C(22)  | -103.29(13) |
| C(22)-C(17)-C(18)-C(19) | 0.36(17)    |
| C(11)-C(17)-C(18)-C(19) | 176.27(11)  |
| C(17)-C(18)-C(19)-C(20) | 0.36(18)    |
| C(18)-C(19)-C(20)-C(21) | -0.60(19)   |
| C(19)-C(20)-C(21)-C(22) | 0.13(19)    |
| C(20)-C(21)-C(22)-C(17) | 0.59(17)    |
| C(18)-C(17)-C(22)-C(21) | -0.83(17)   |
| C(11)-C(17)-C(22)-C(21) | -176.76(10) |

---

Symmetry transformations used to generate equivalent atoms:

Table S8. Hydrogen bonds for mo\_hd\_fjy1\_0m [ $\text{\AA}$  and  $^\circ$ ].

| D-H...A              | d(D-H) | d(H...A) | d(D...A)   | $\angle(\text{DHA})$ |
|----------------------|--------|----------|------------|----------------------|
| C(10)-H(17)...O(3)#1 | 0.98   | 2.59     | 3.3120(15) | 130.4                |
| C(10)-H(17)...O(3)#1 | 0.98   | 2.59     | 3.3120(15) | 130.4                |
| C(10)-H(17)...O(3)#1 | 0.98   | 2.59     | 3.3120(15) | 130.4                |
| C(10)-H(17)...O(3)#1 | 0.98   | 2.59     | 3.3120(15) | 130.4                |
| C(10)-H(17)...O(3)#1 | 0.98   | 2.59     | 3.3120(15) | 130.4                |
| C(10)-H(17)...O(3)#1 | 0.98   | 2.59     | 3.3120(15) | 130.4                |
| C(10)-H(17)...O(3)#1 | 0.98   | 2.59     | 3.3120(15) | 130.4                |
| C(10)-H(17)...O(3)#1 | 0.98   | 2.59     | 3.3120(15) | 130.4                |

Symmetry transformations used to generate equivalent atoms:

#1 -x,y+1/2,-z+1/2

## 8. The fluorescence properties of compound 6.

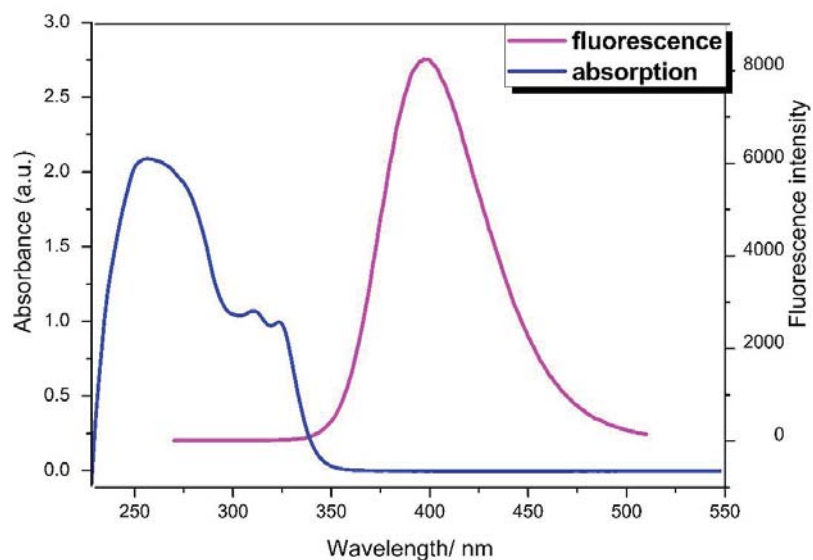

Figure S8. UV-vis absorption and fluorescence spectra of **6** ( $5 \times 10^{-5} \text{ mol L}^{-1}$ ) in THF

7.  $^1\text{H}$  and  $^{13}\text{C}$  NMR spectra for compounds **3aa-aq** and compounds **4aa-ap** and derivatives **5** and **6**.

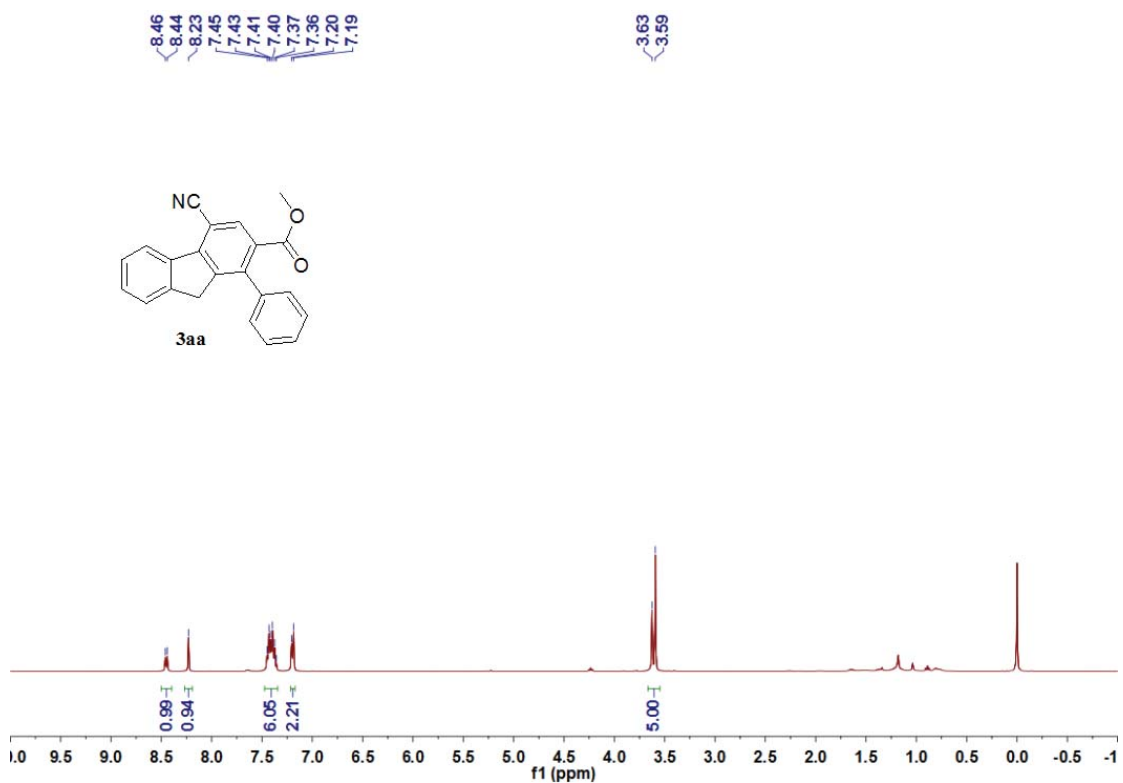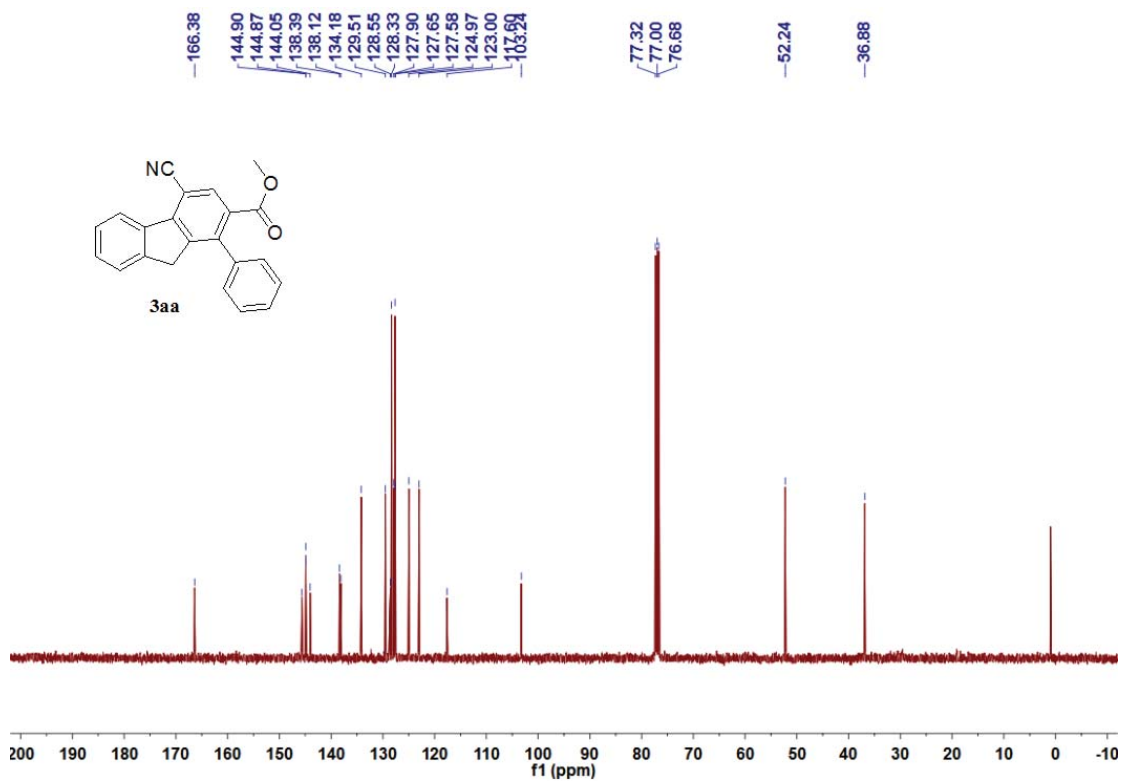

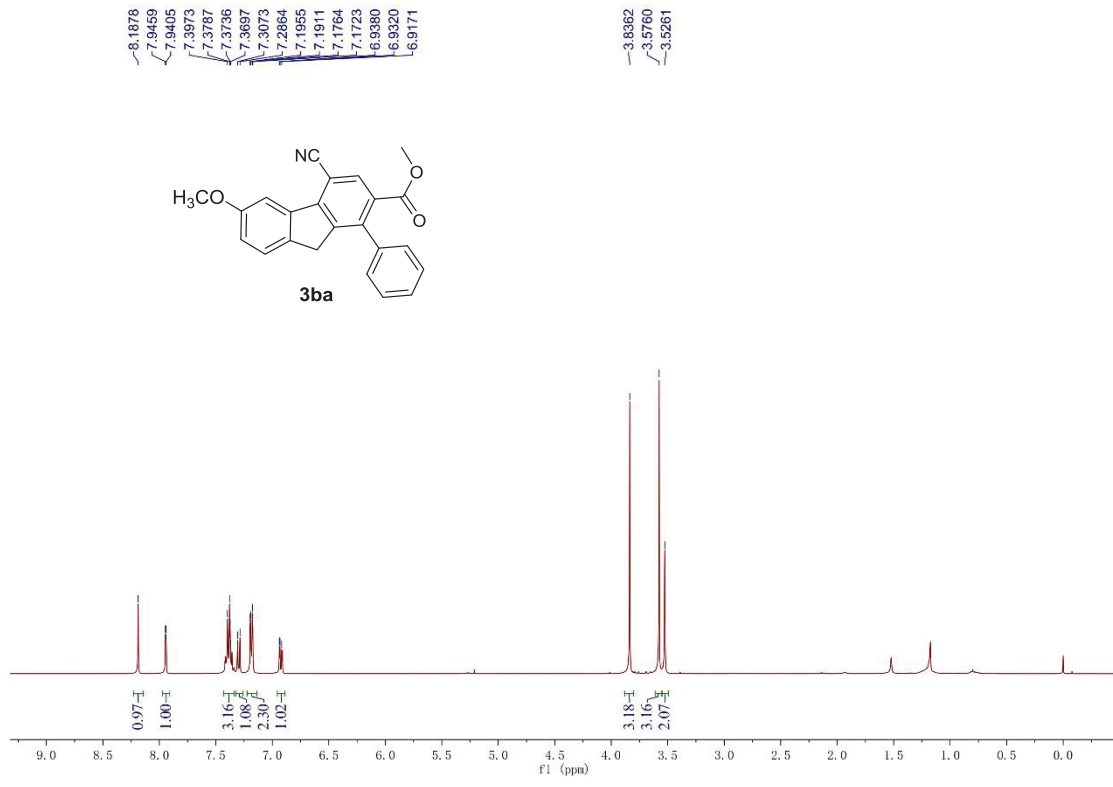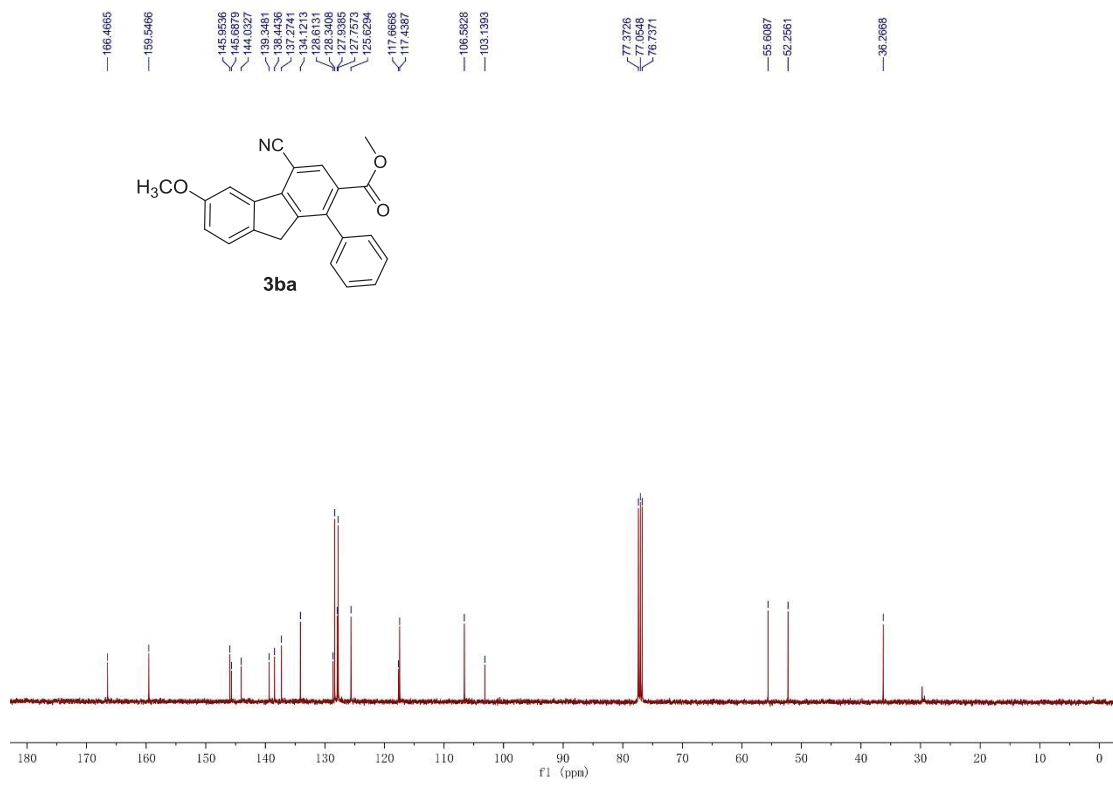



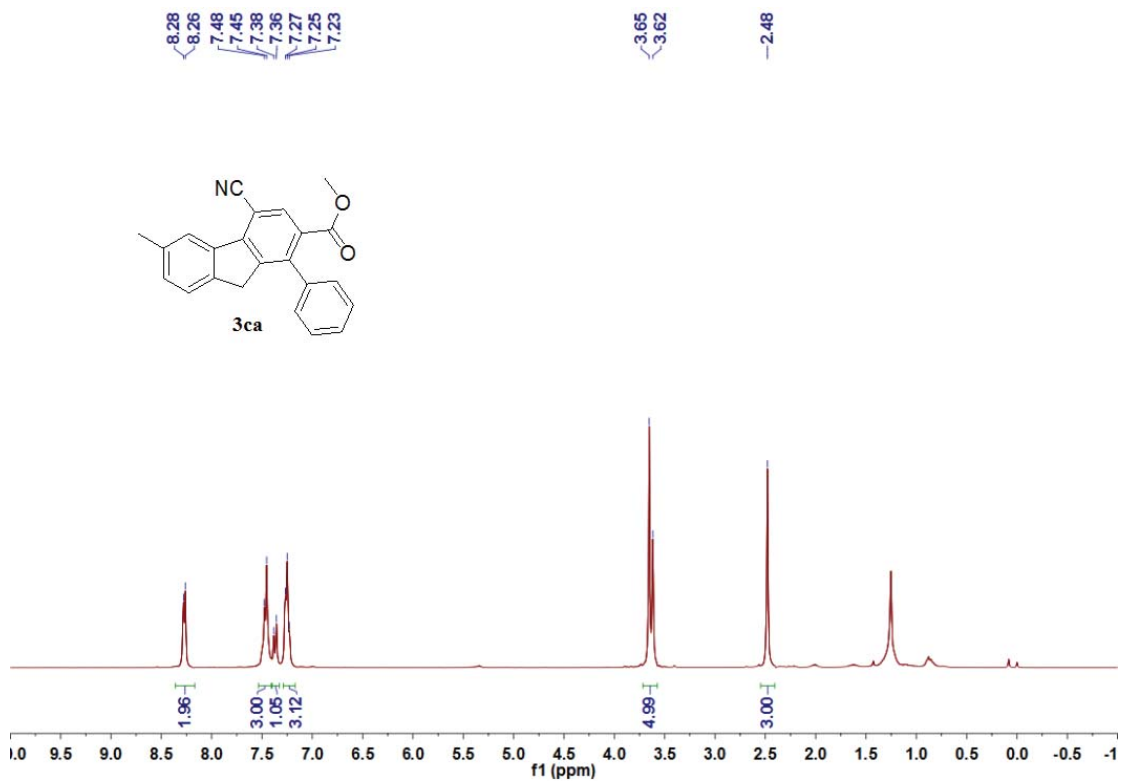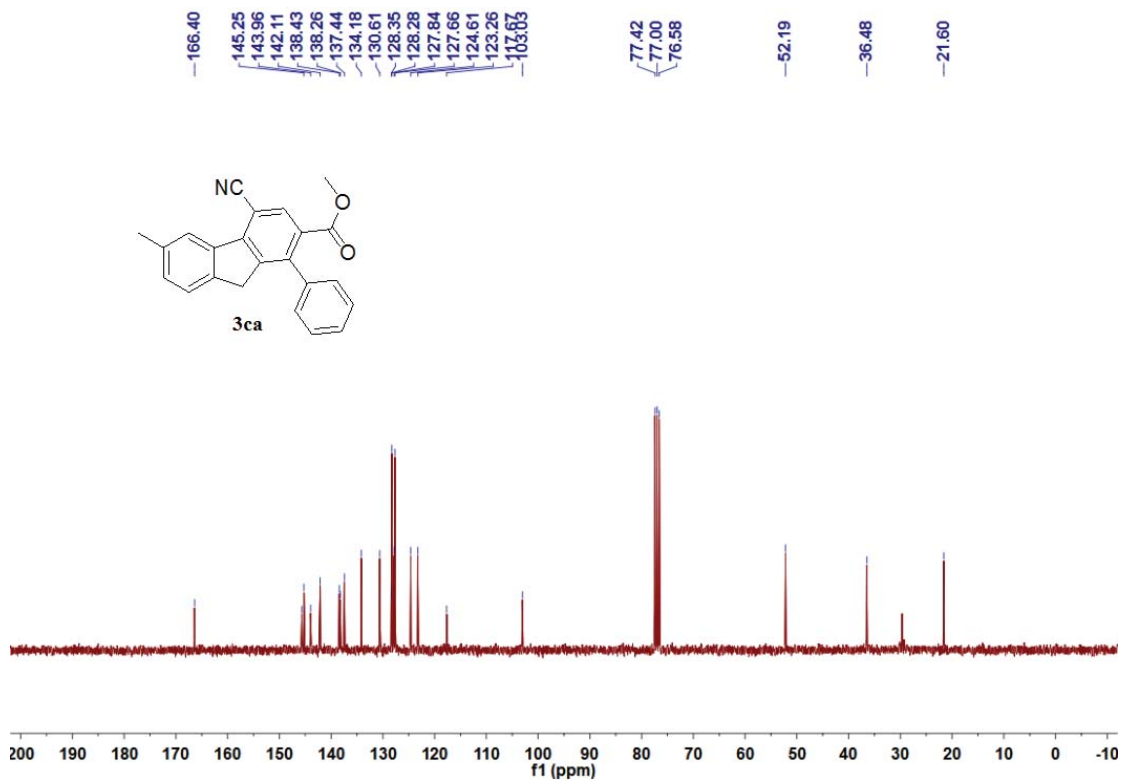

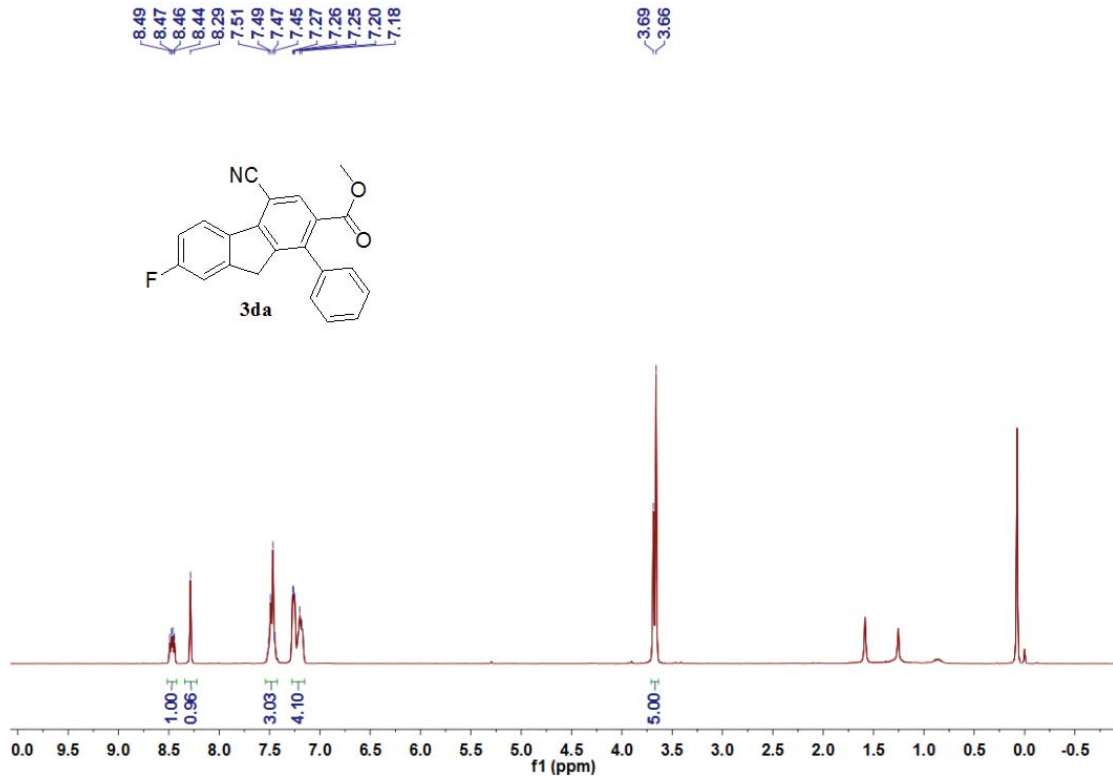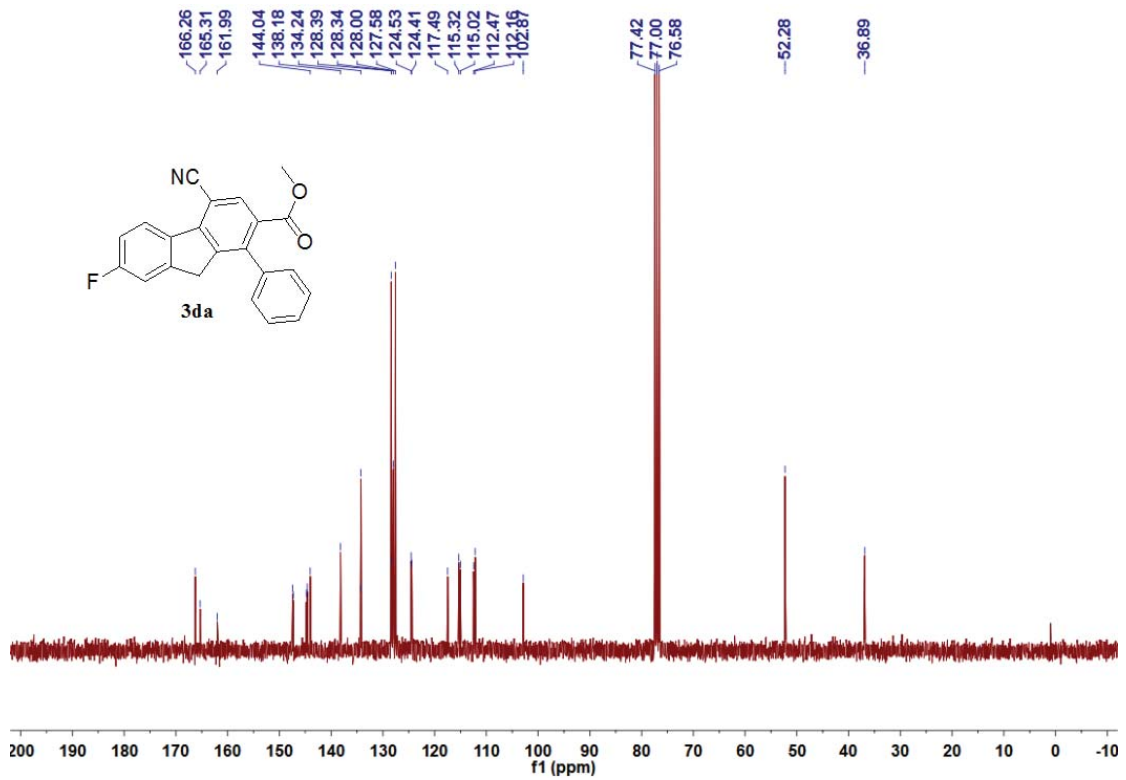

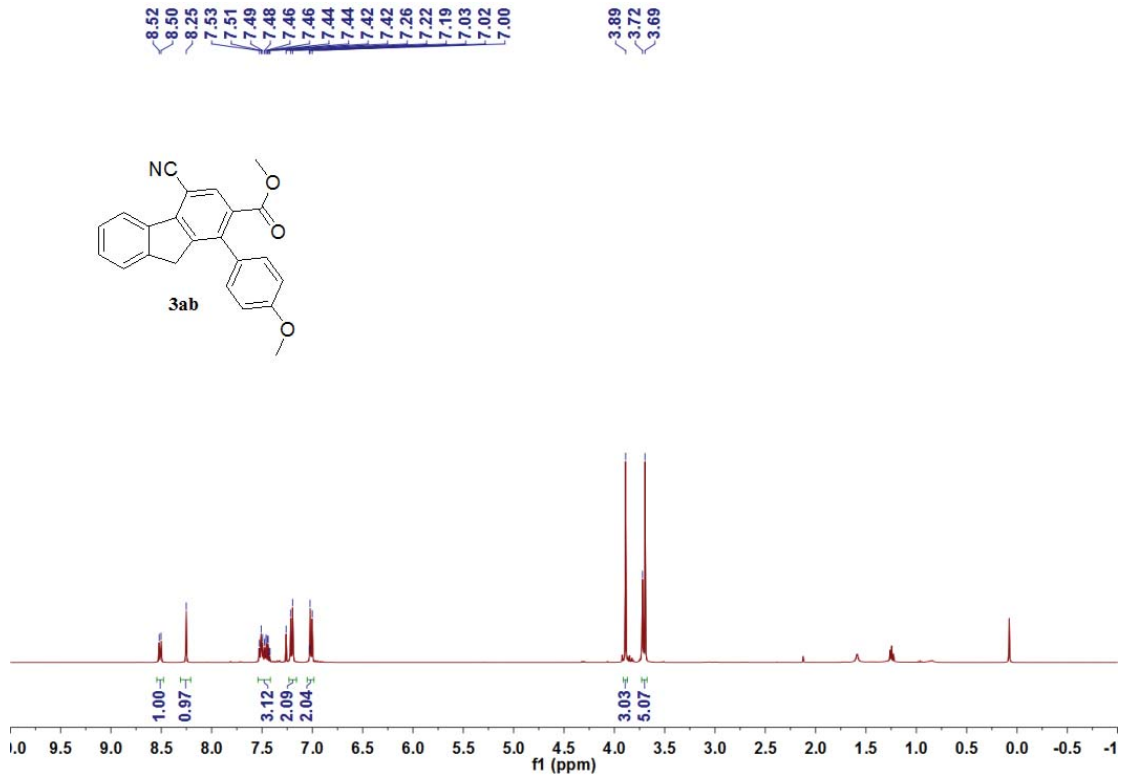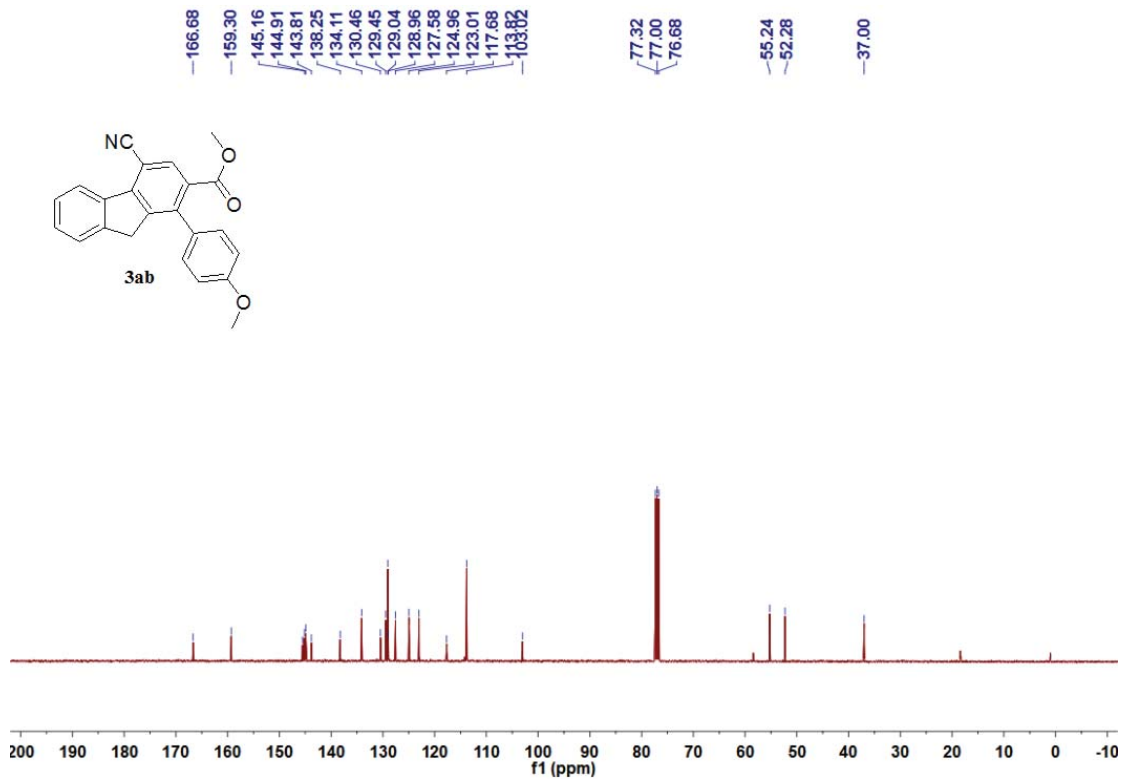

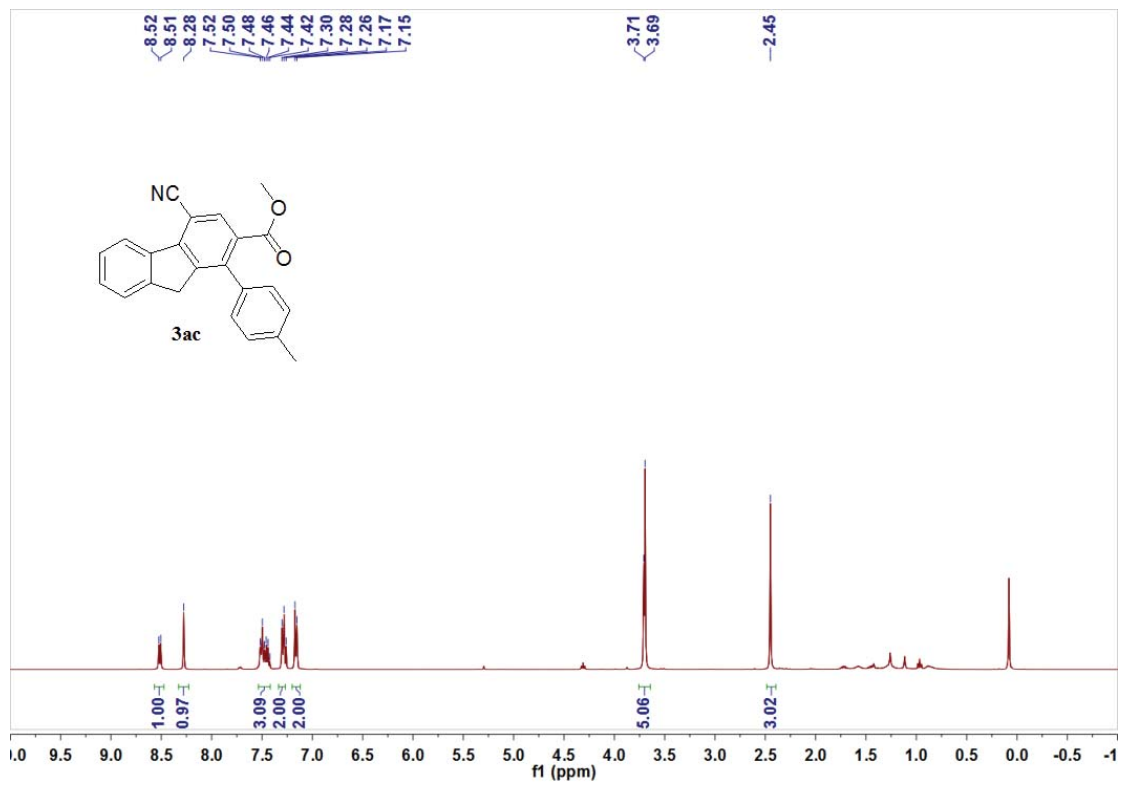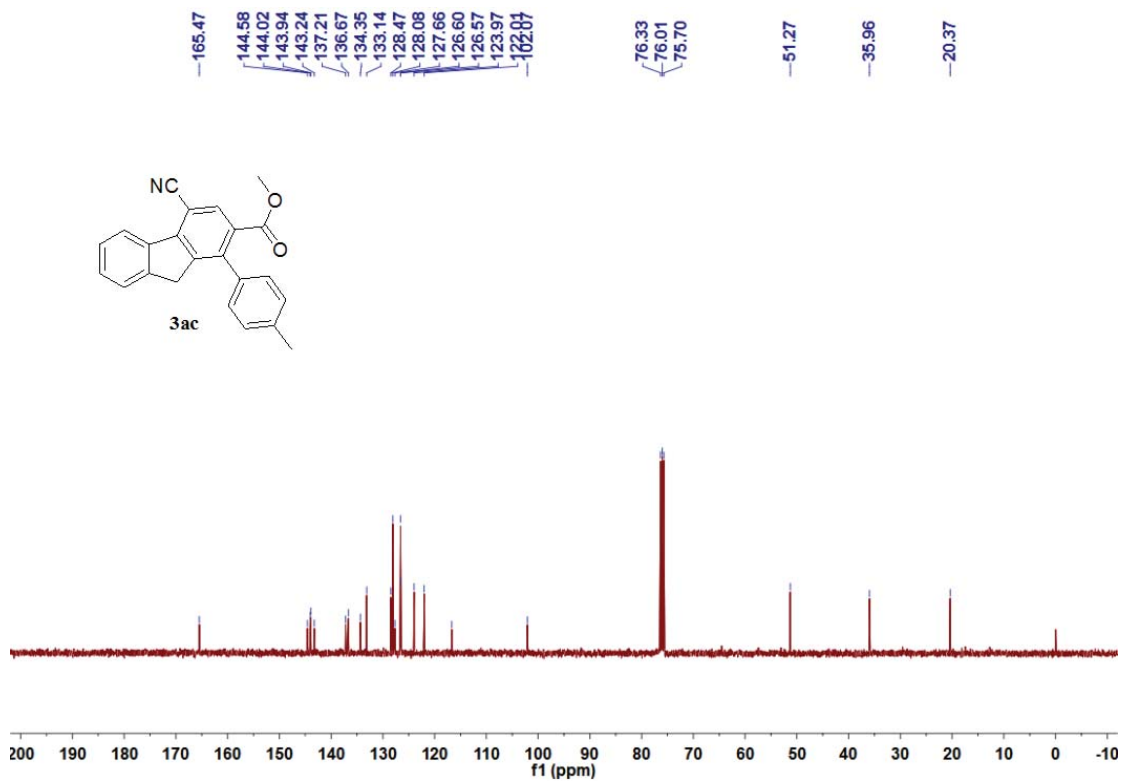

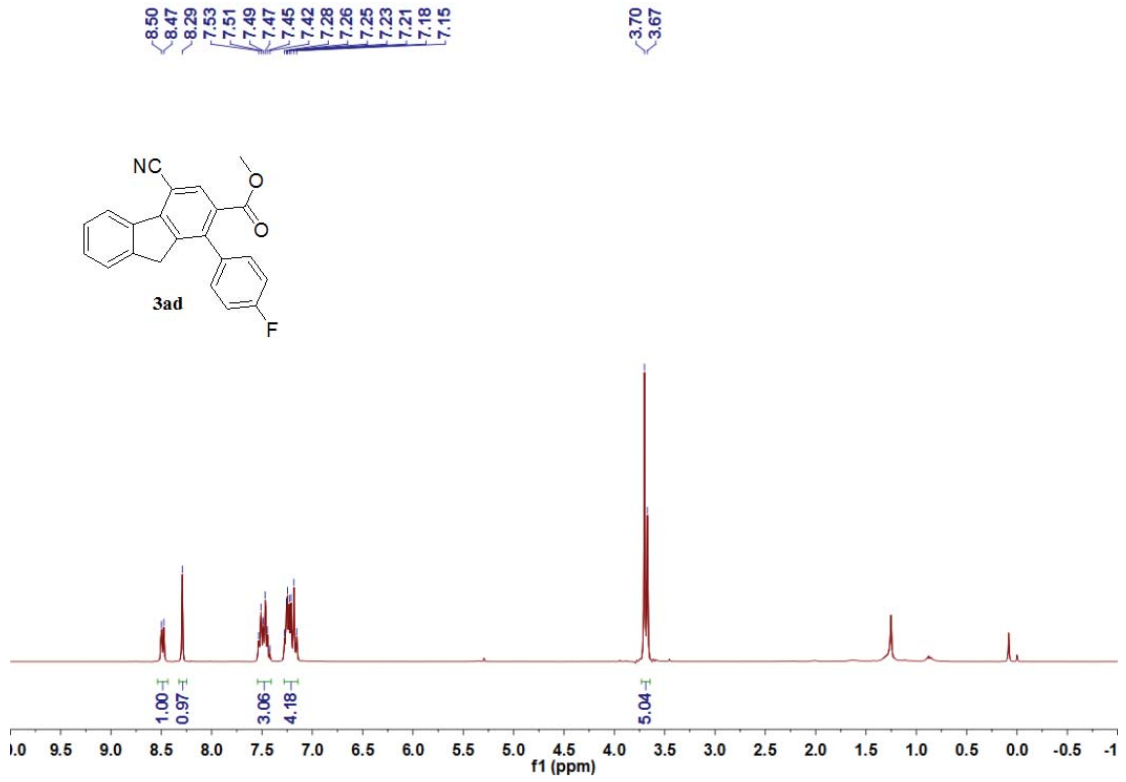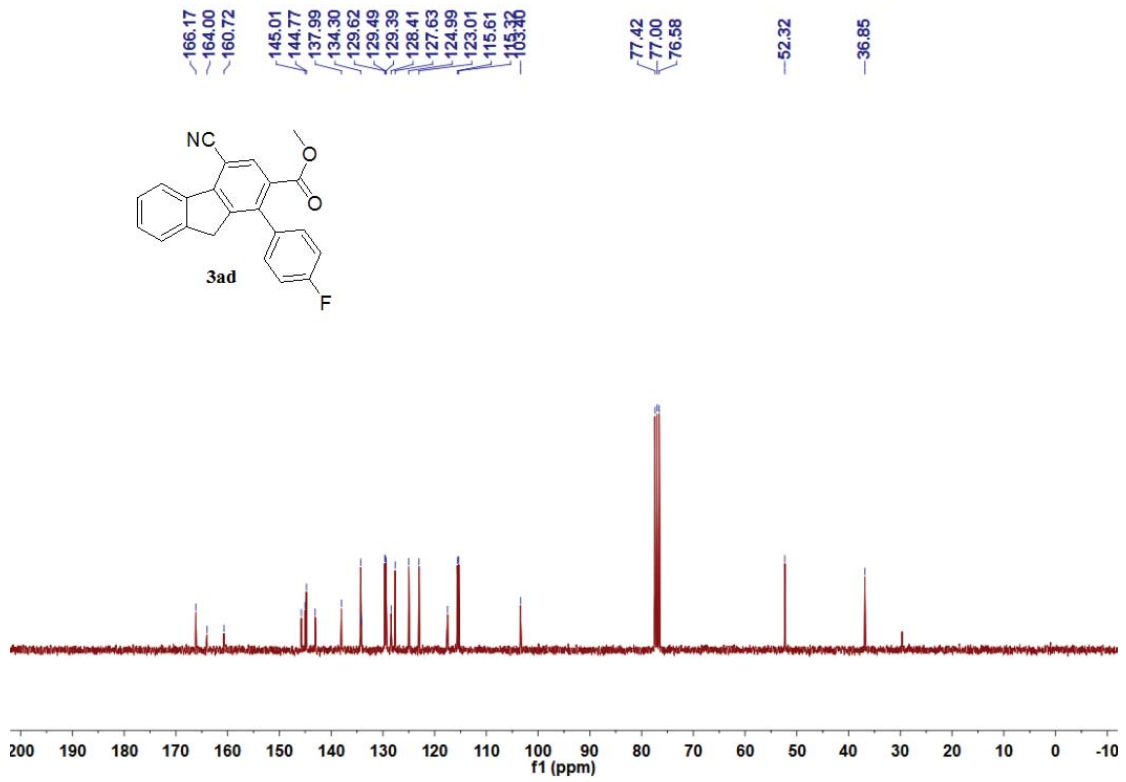

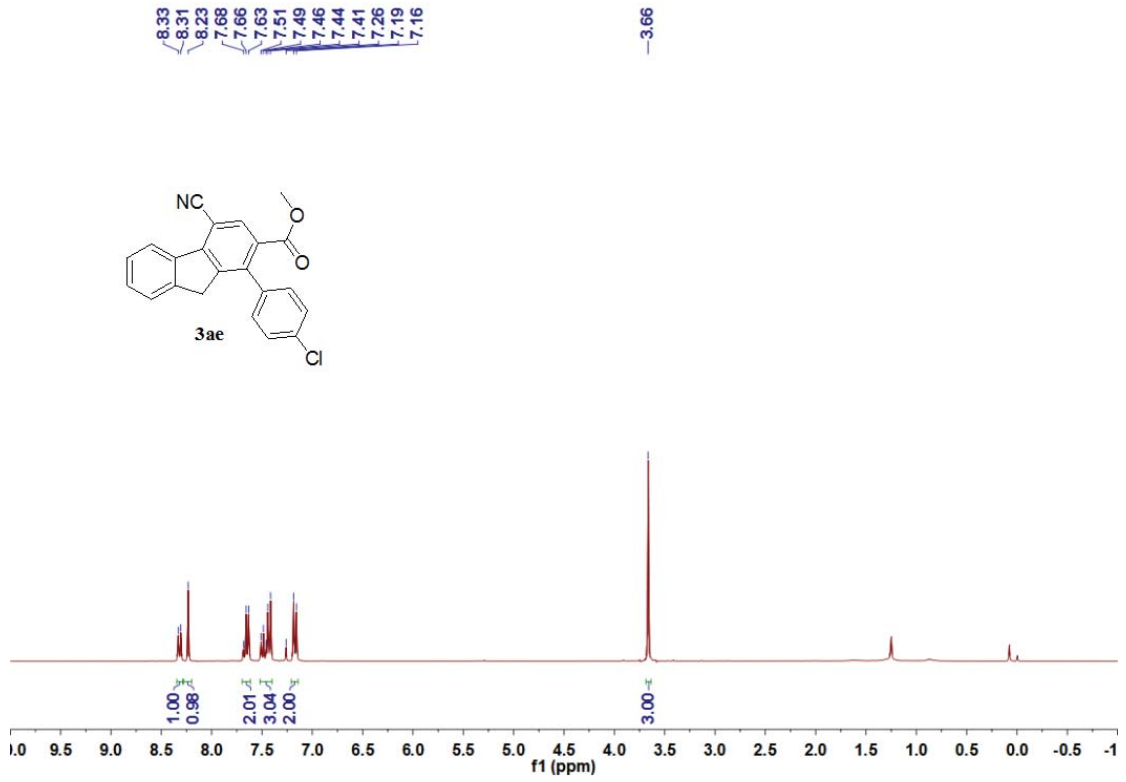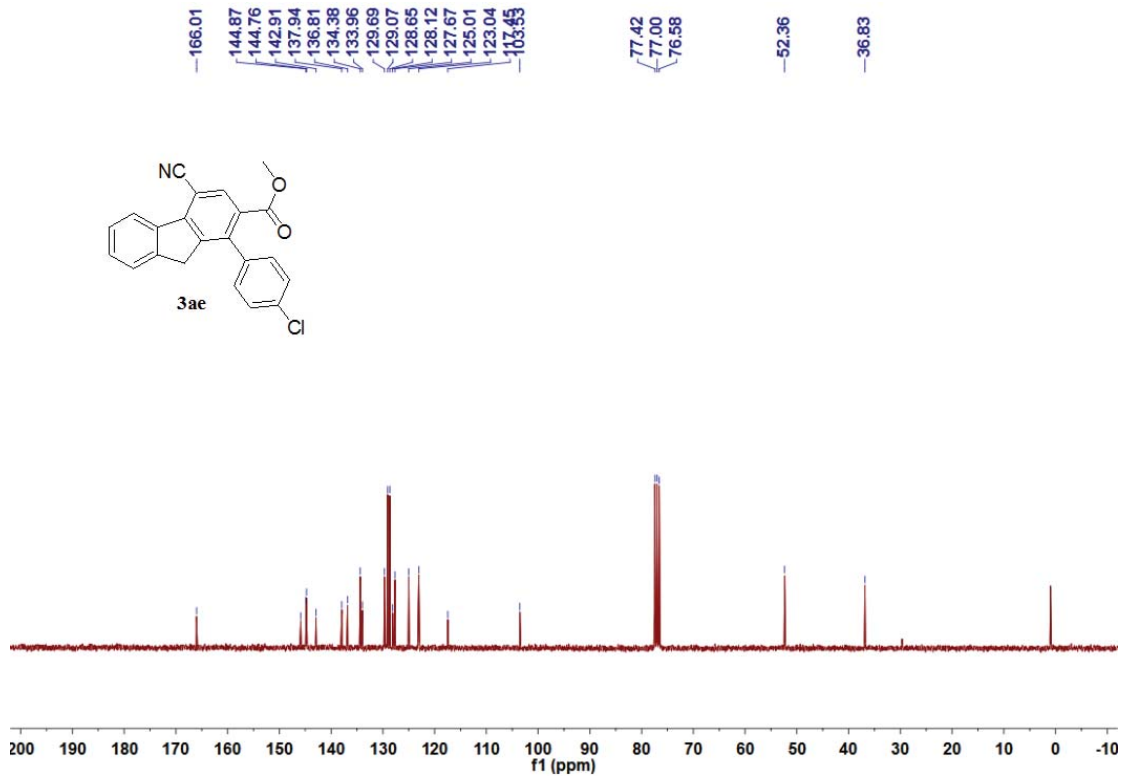

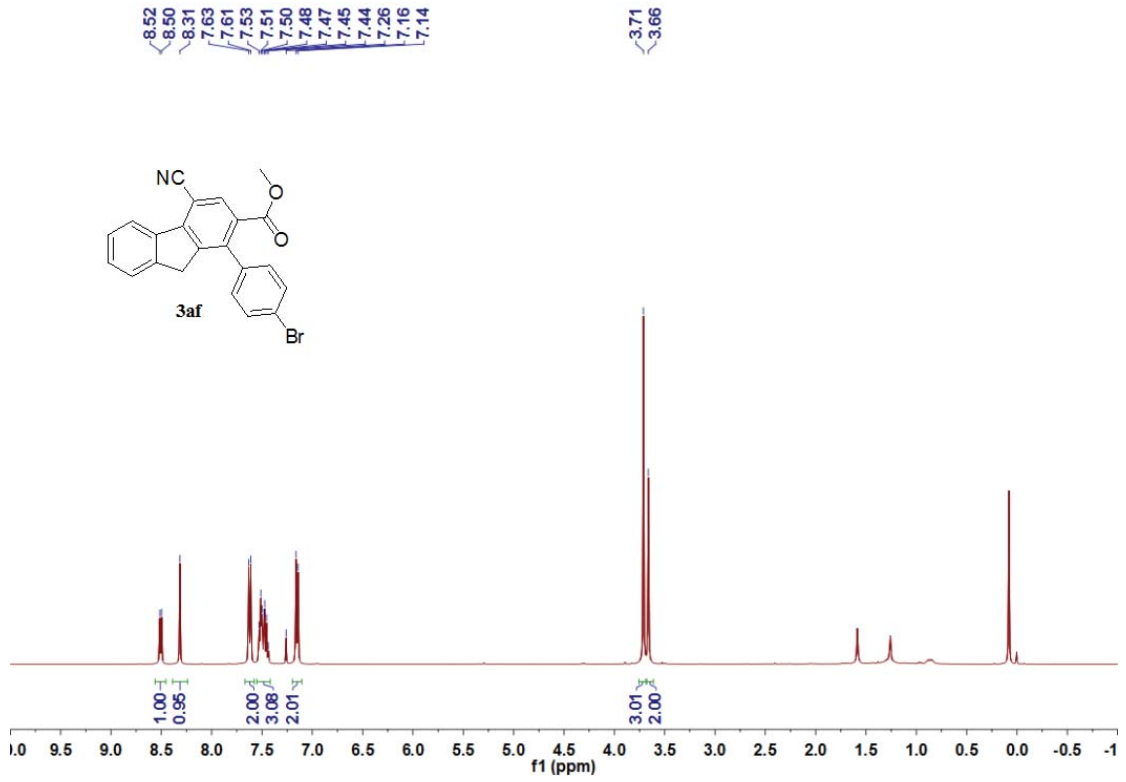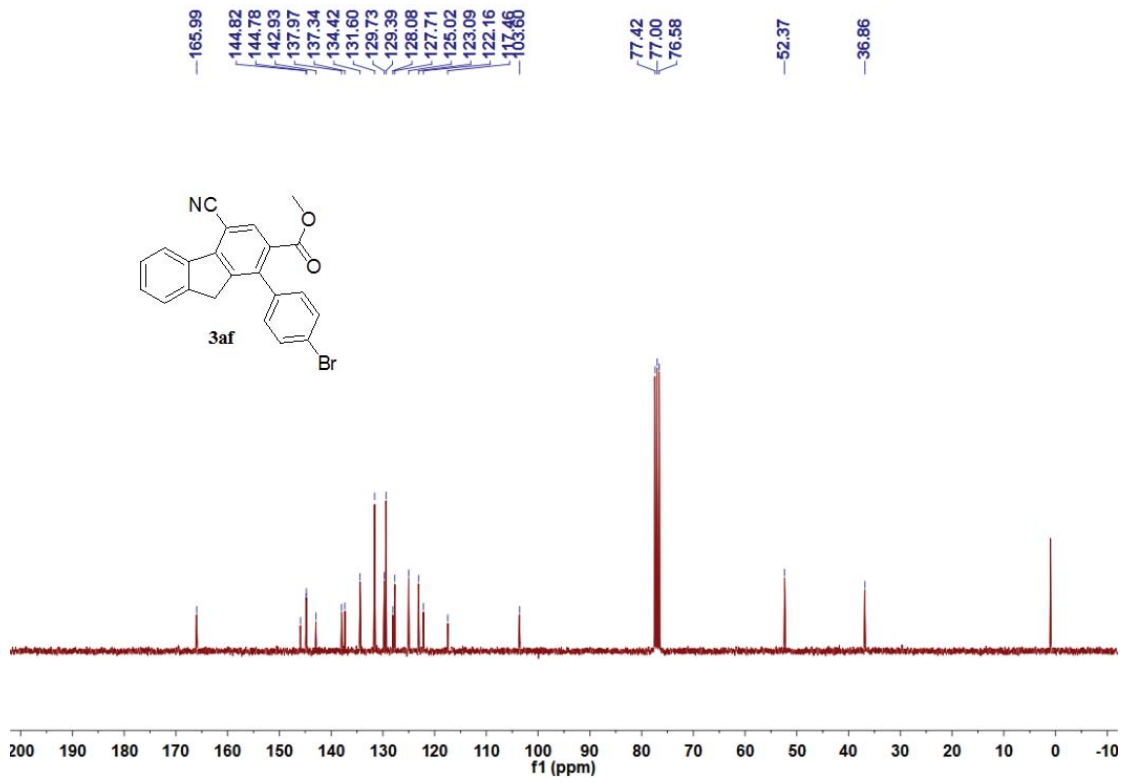

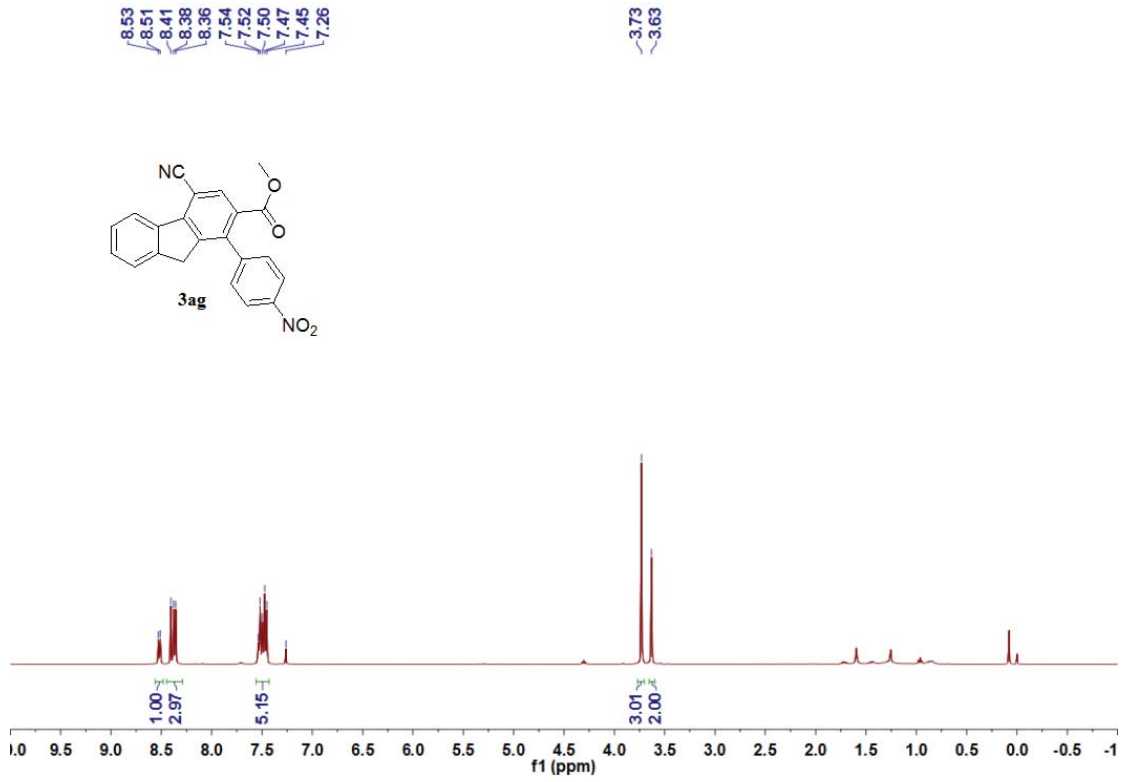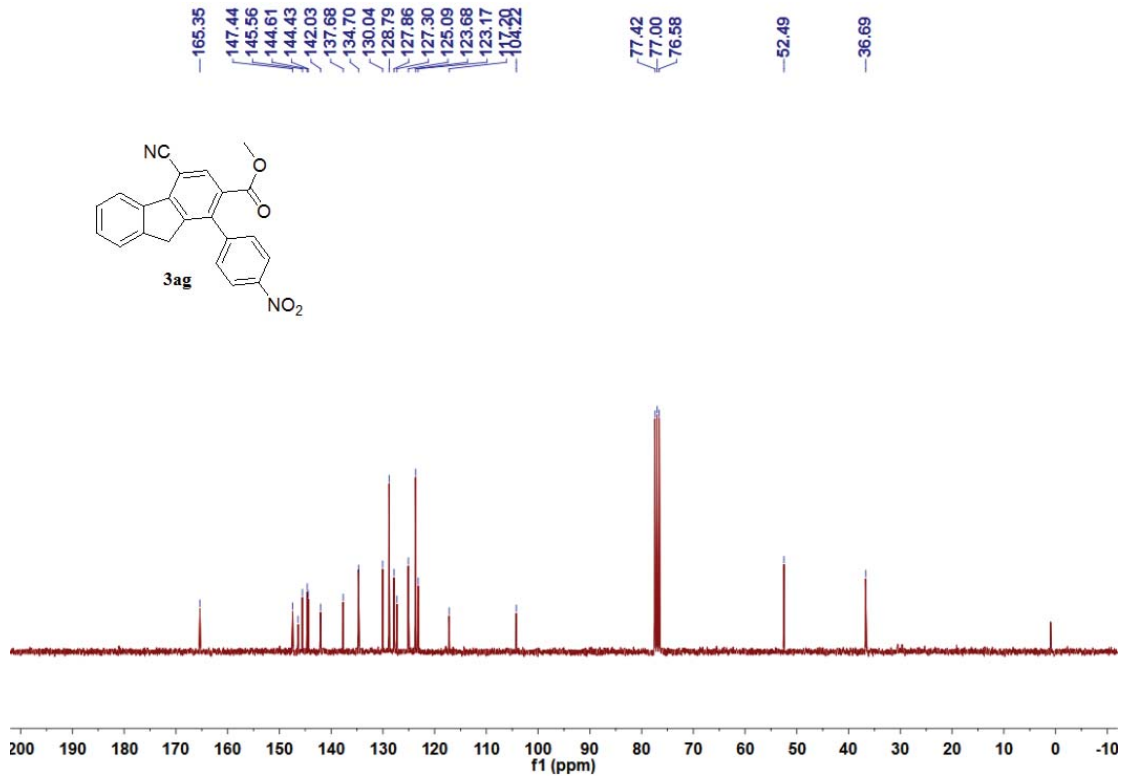



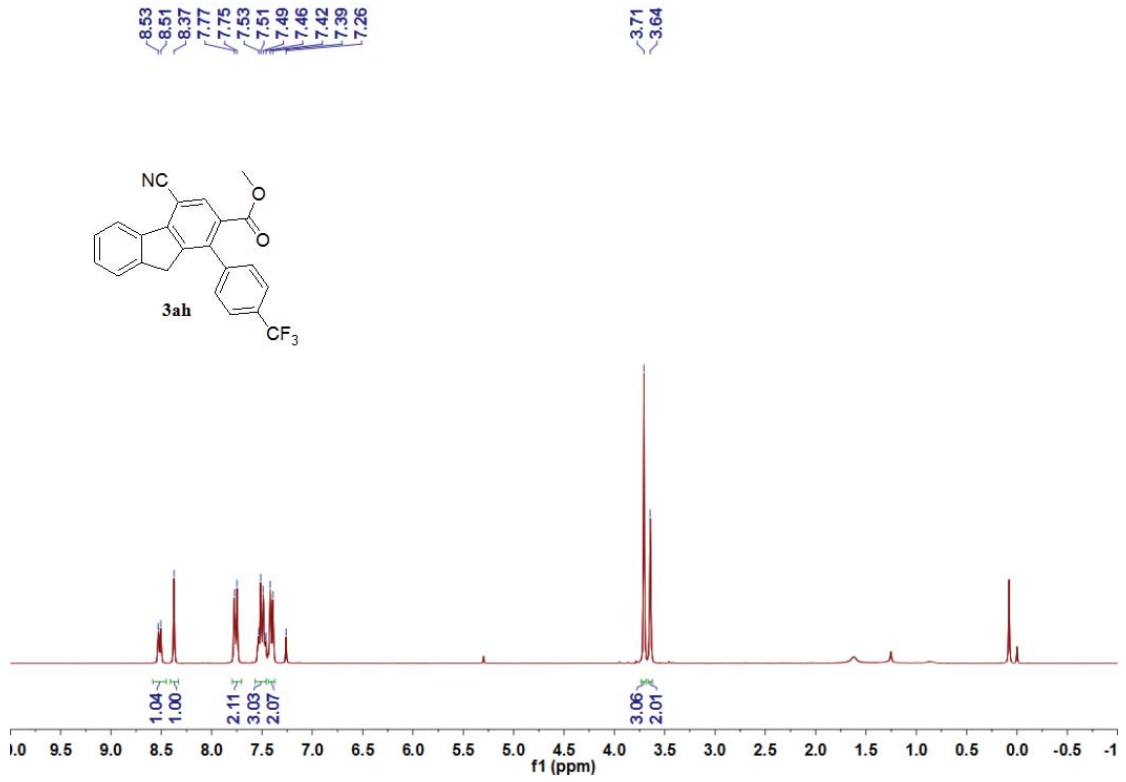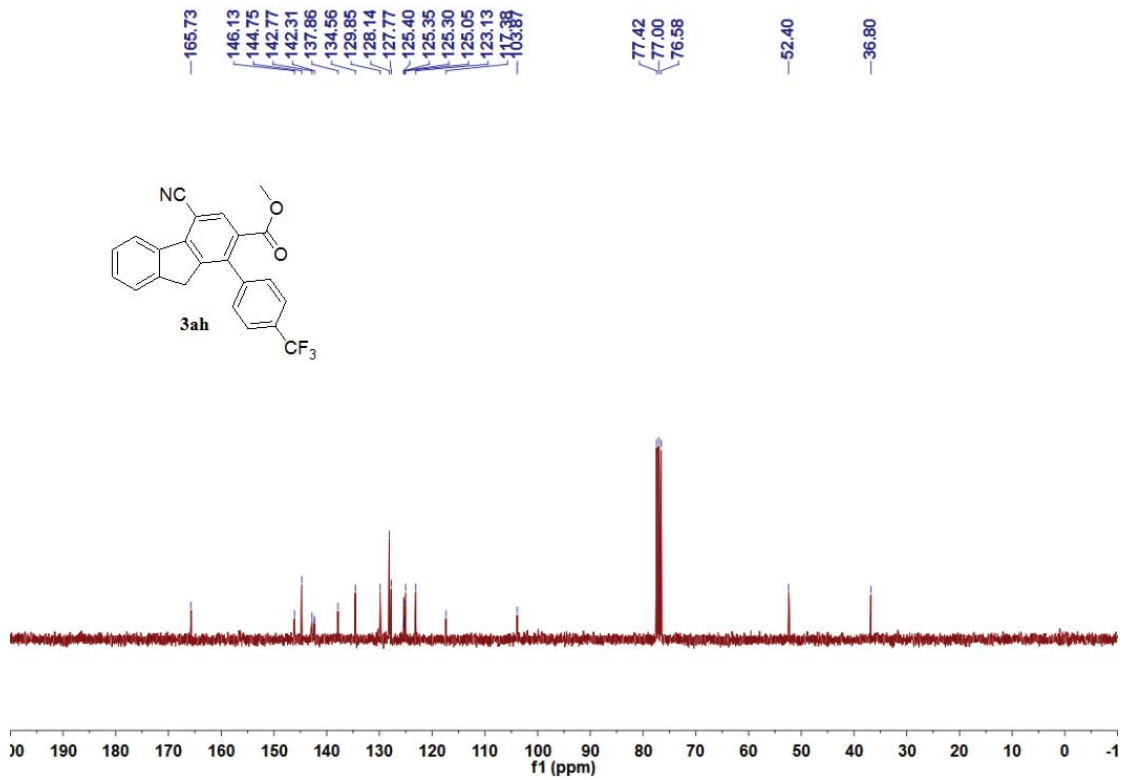

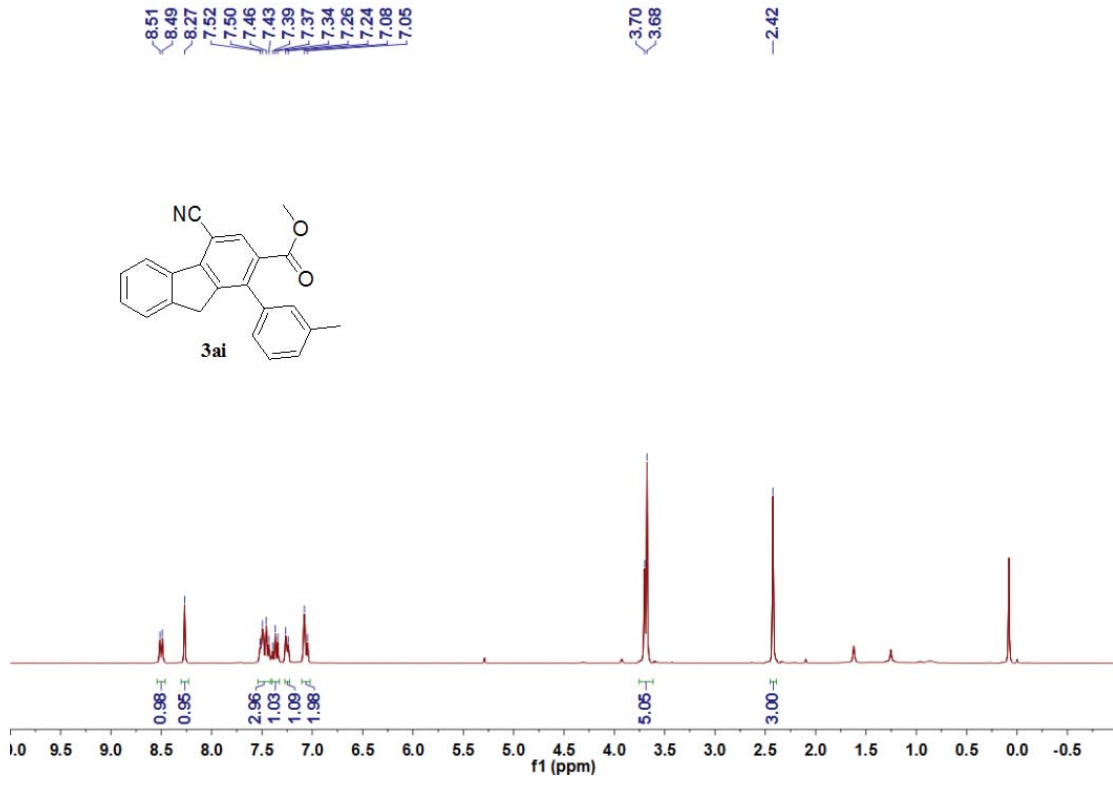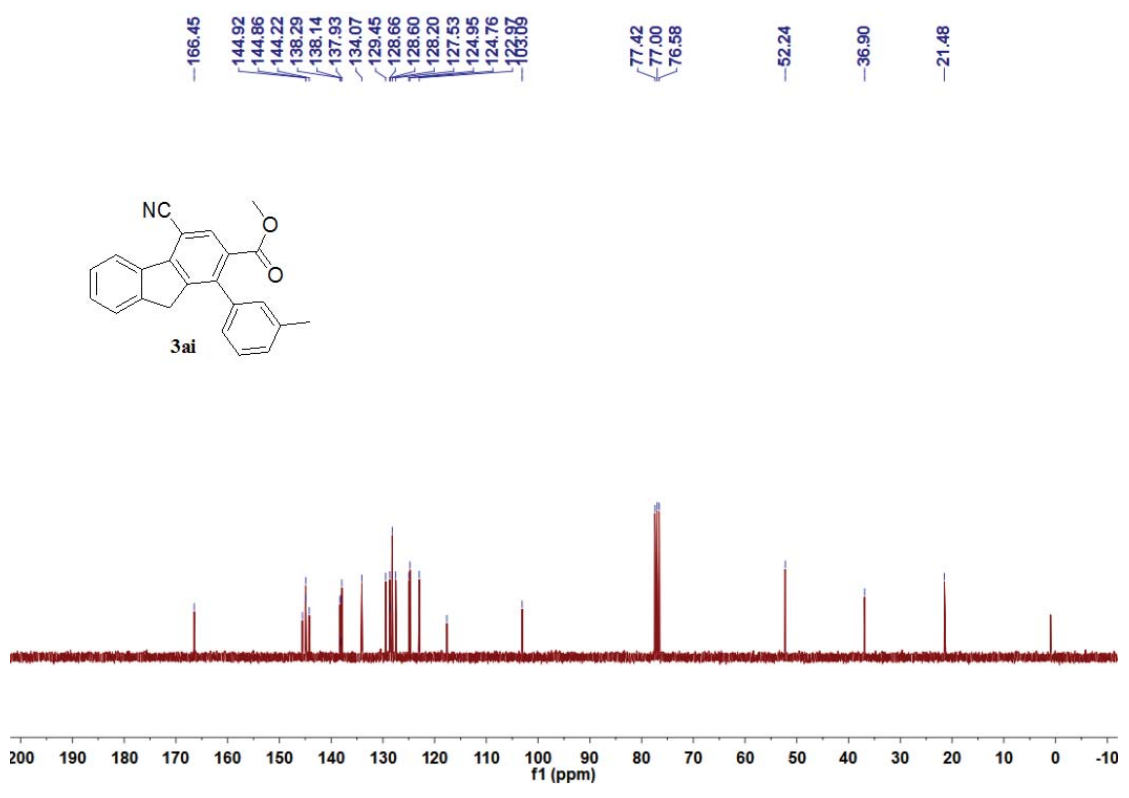

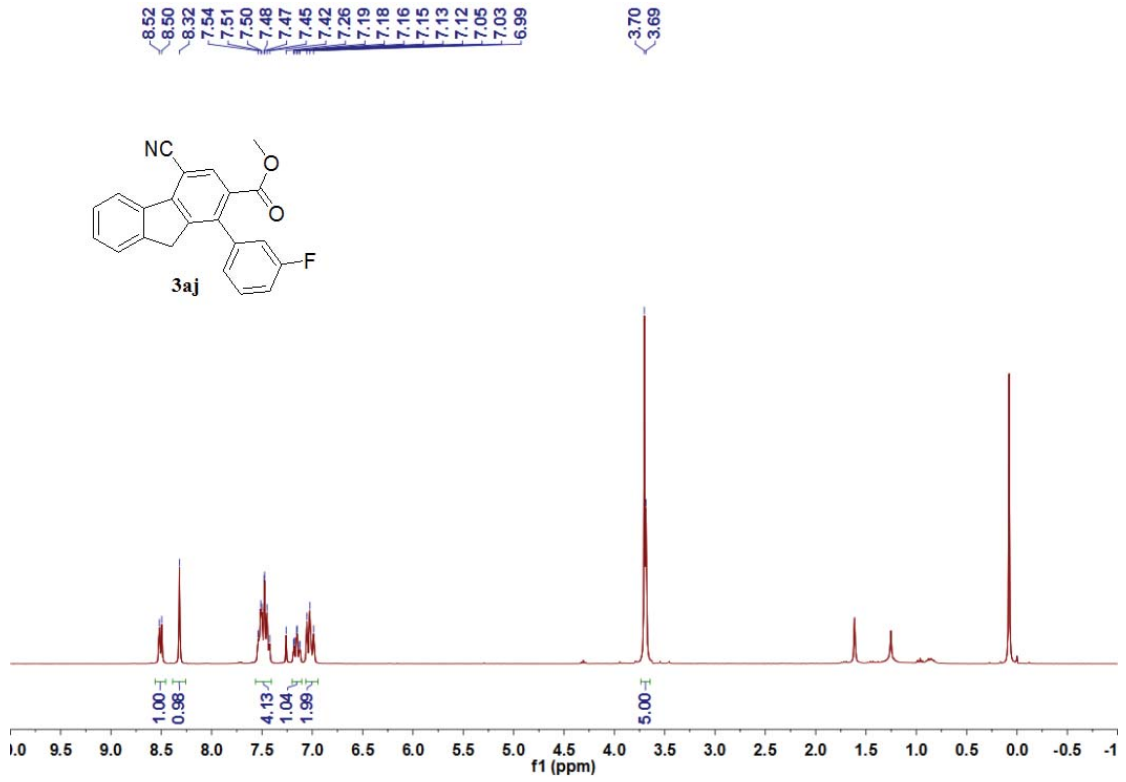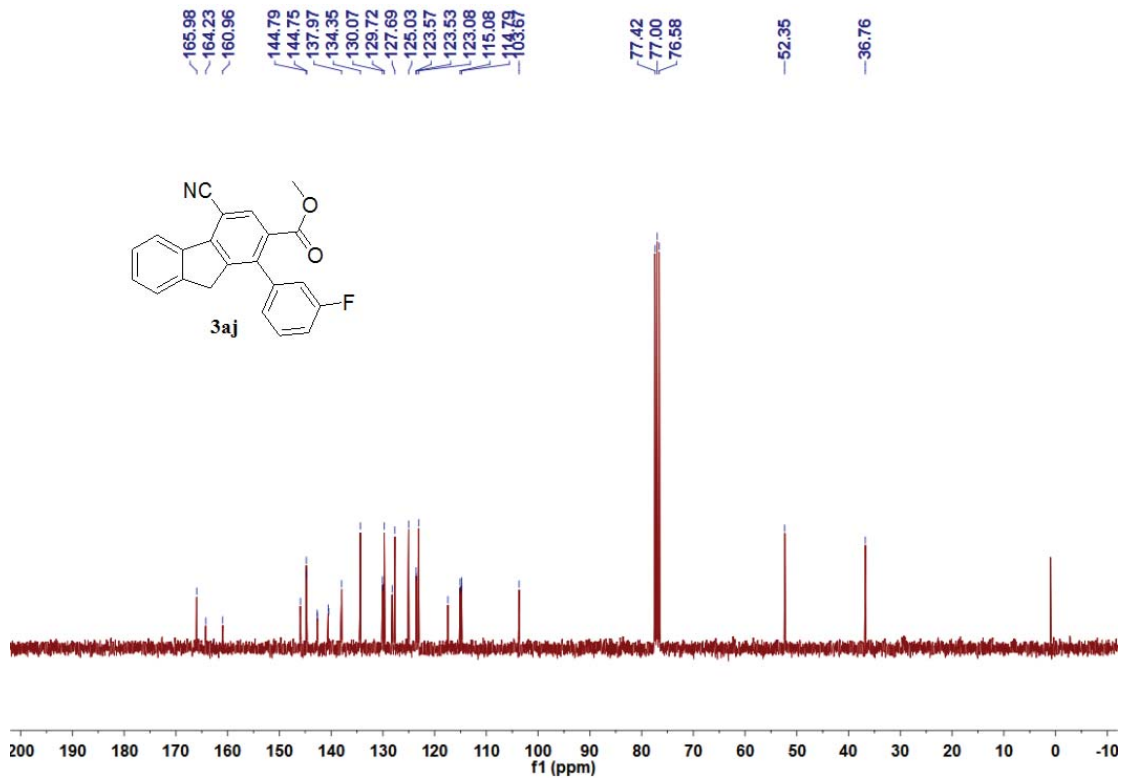

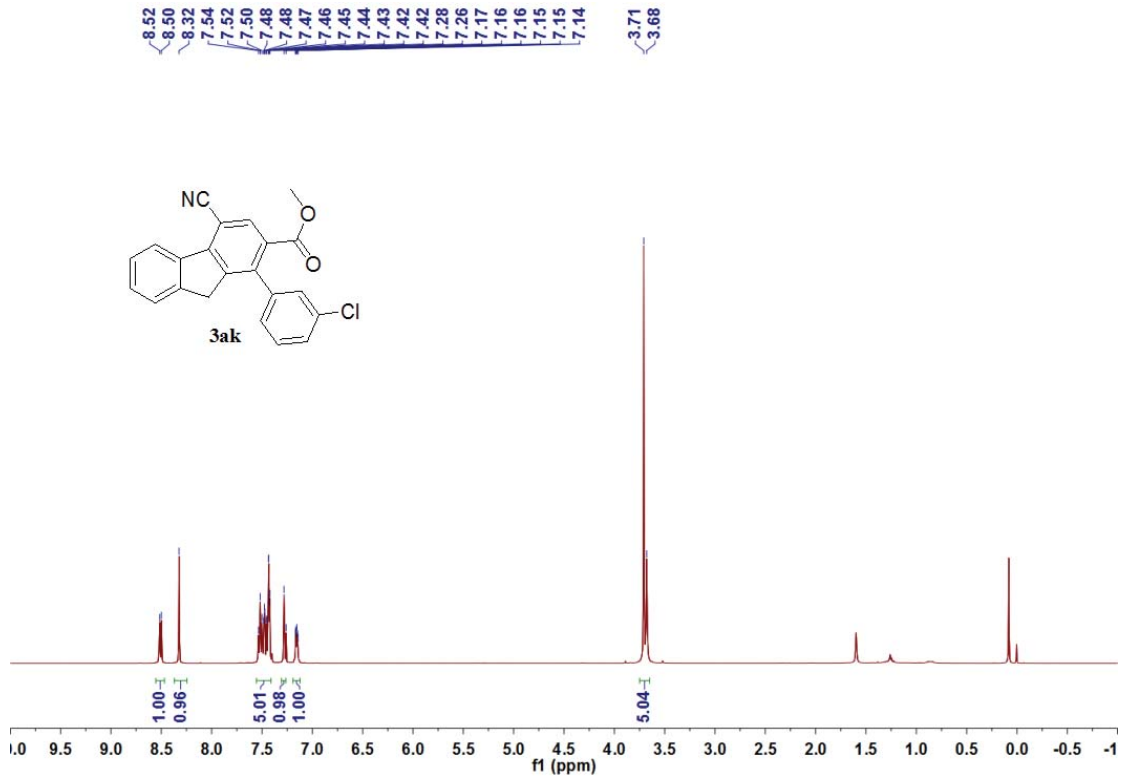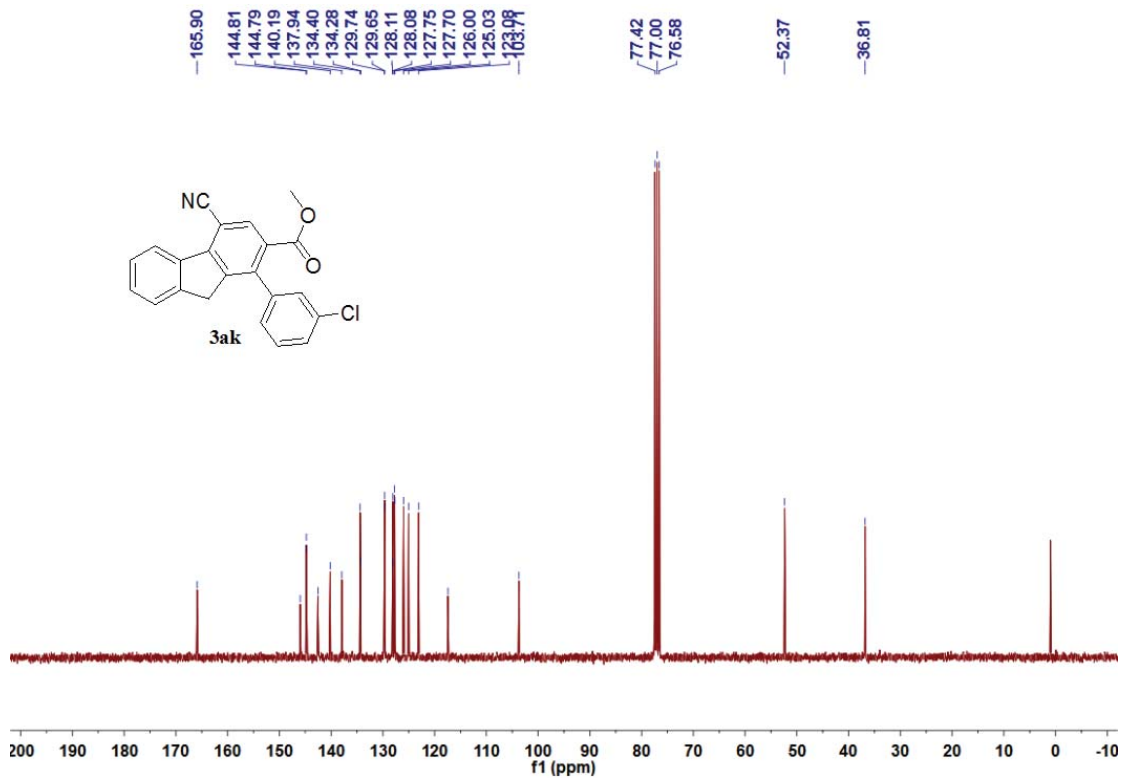

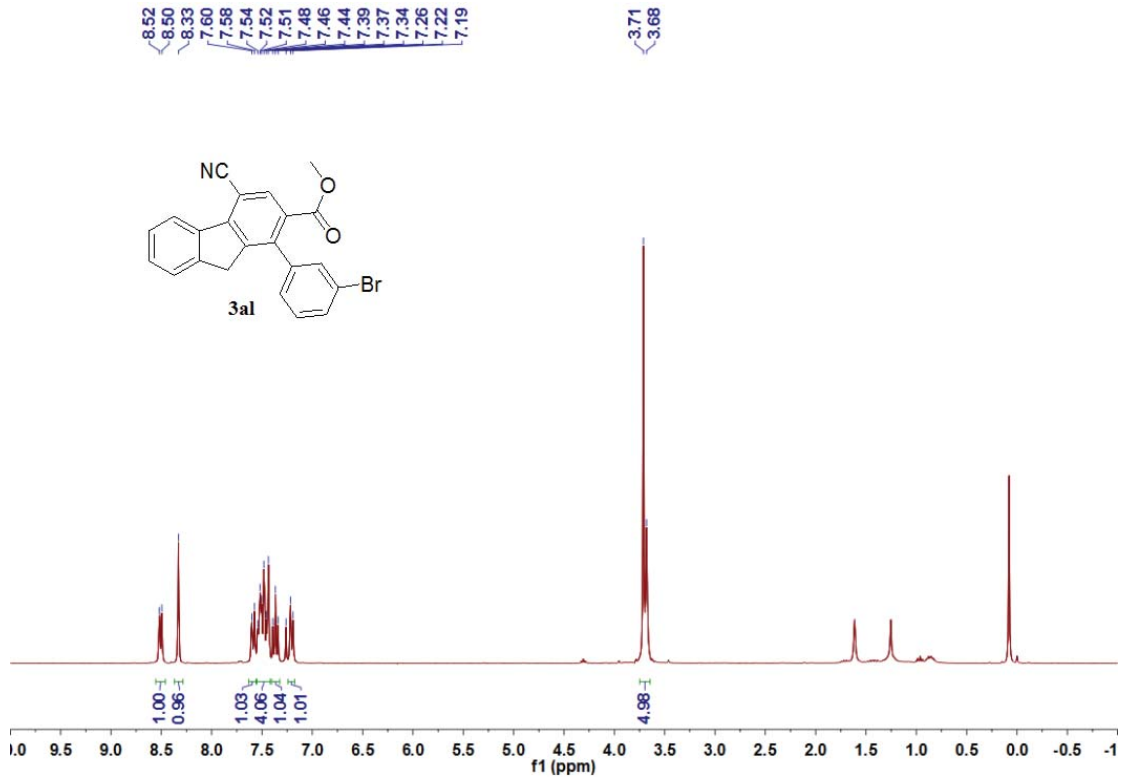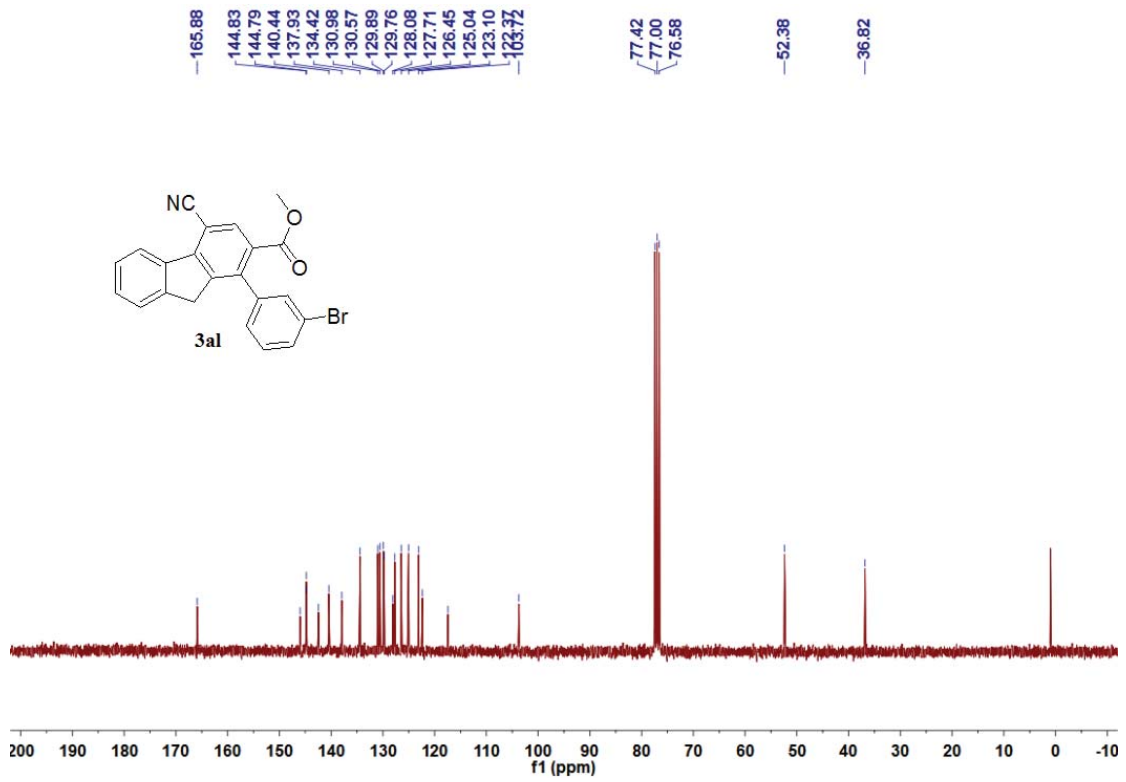

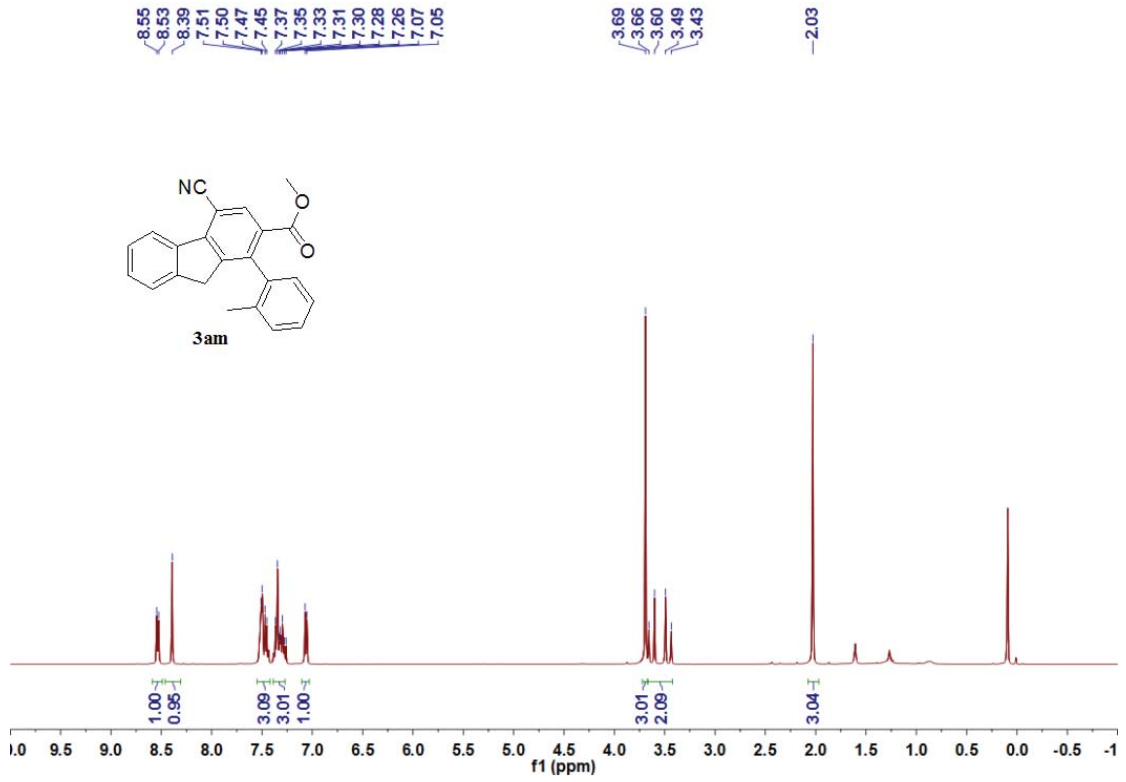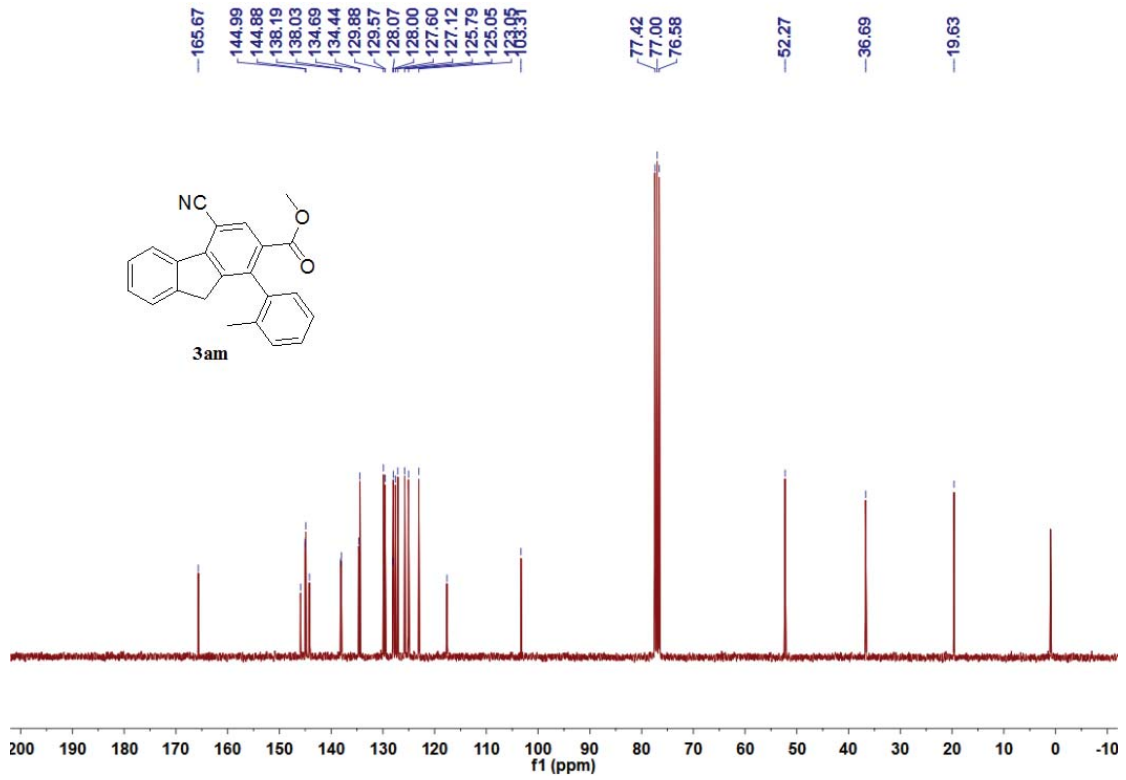

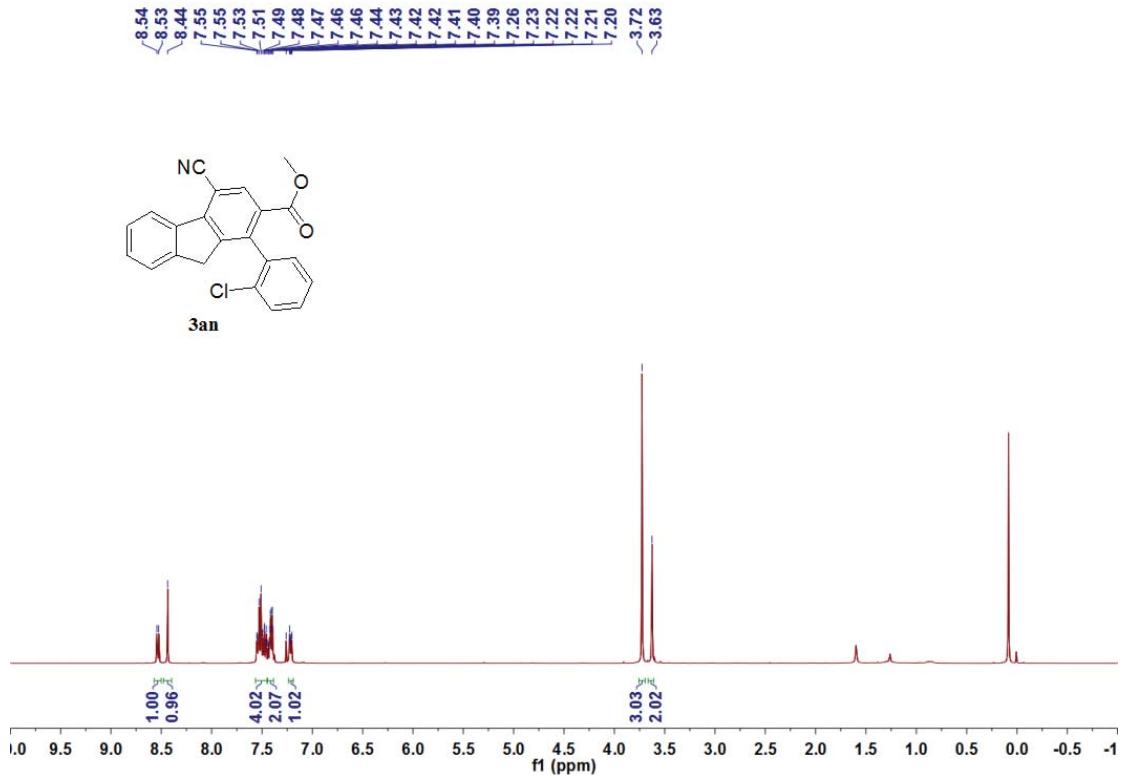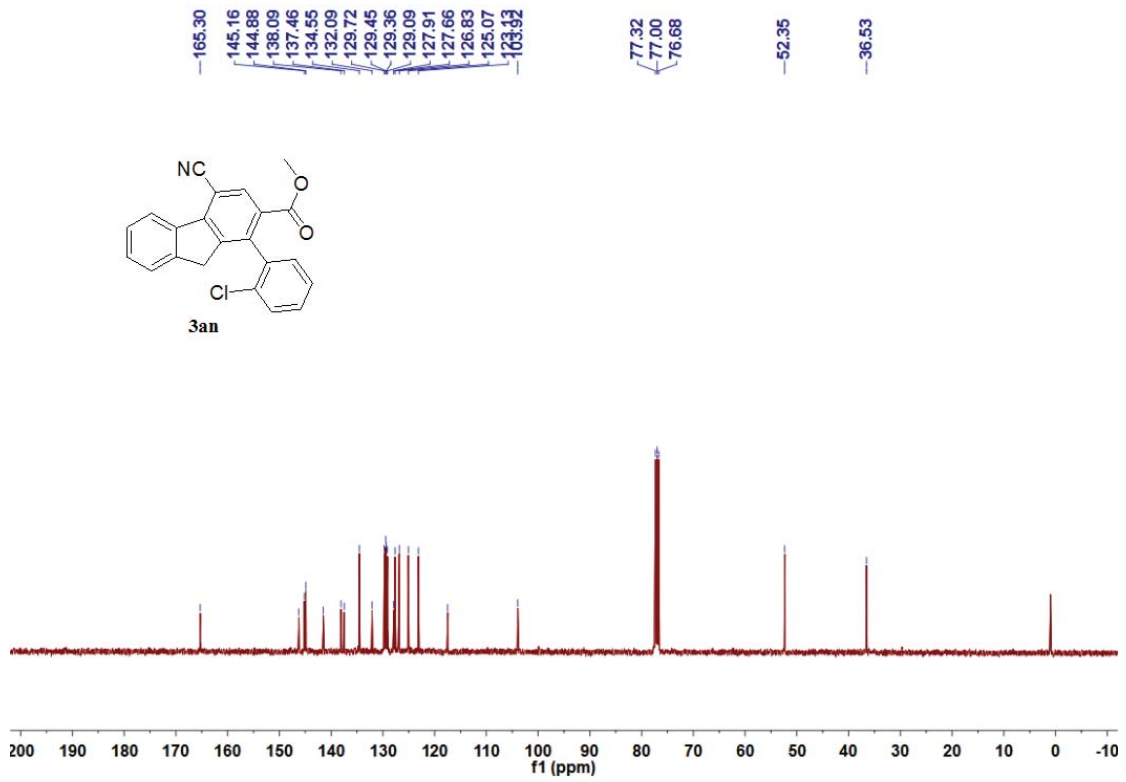

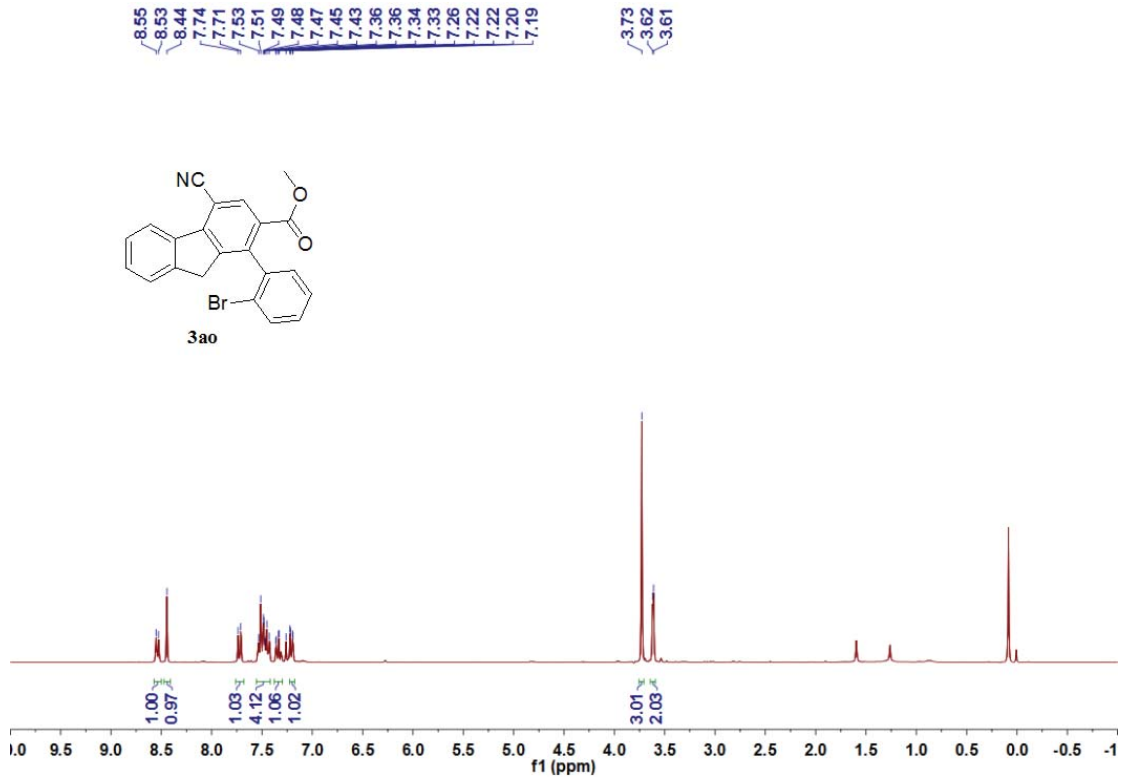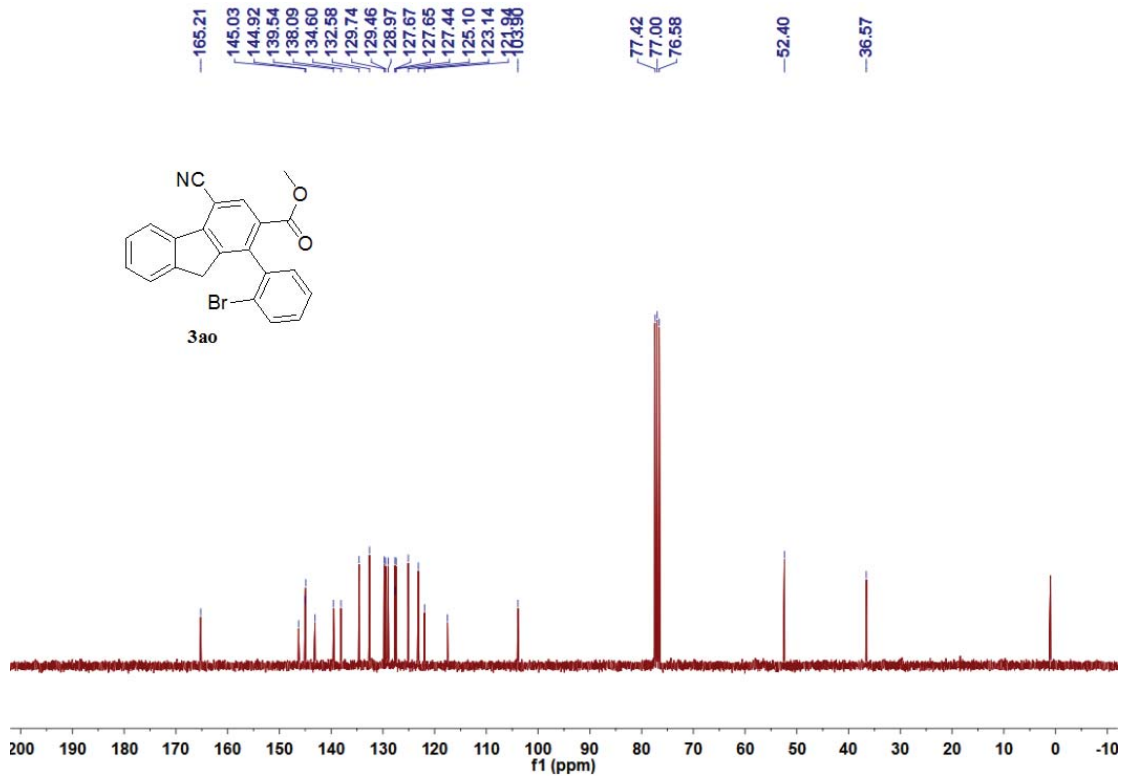



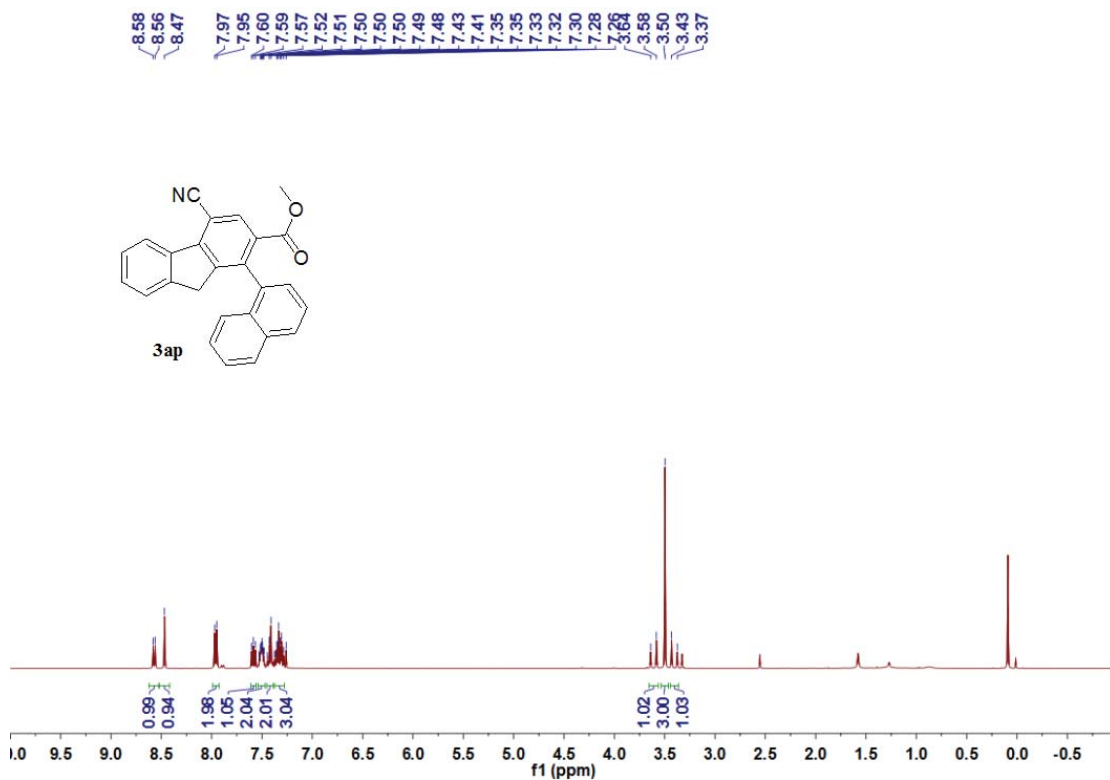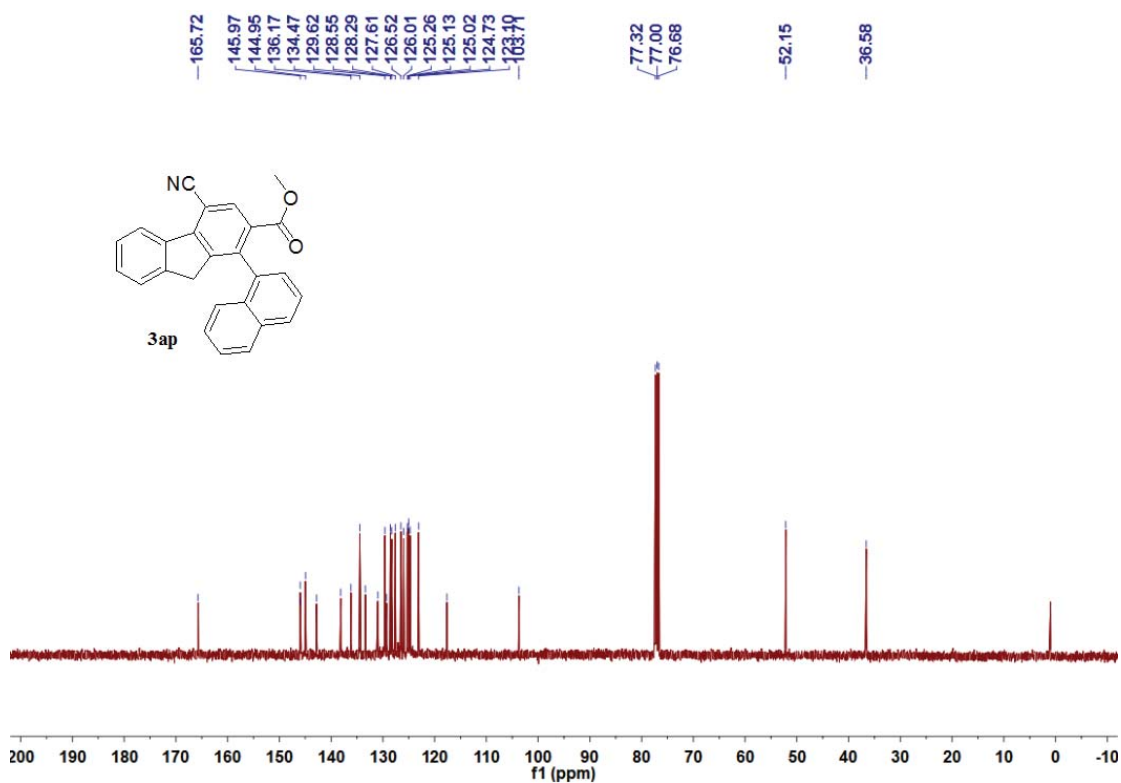

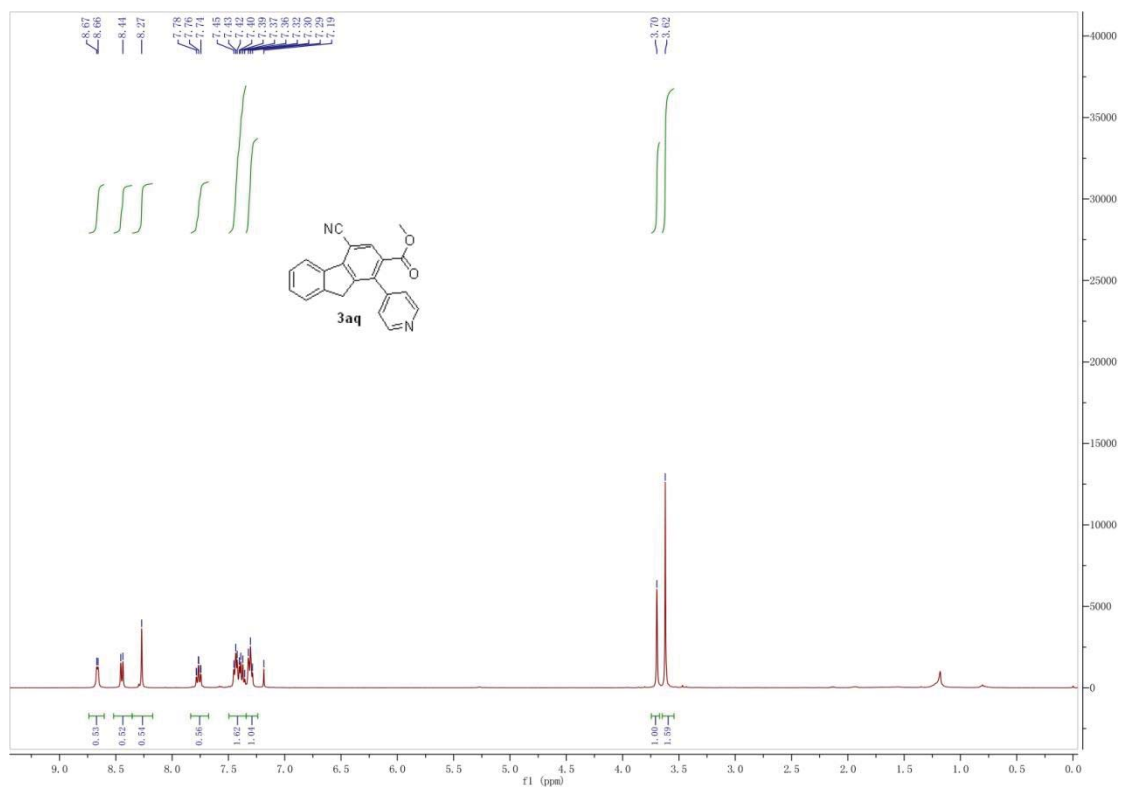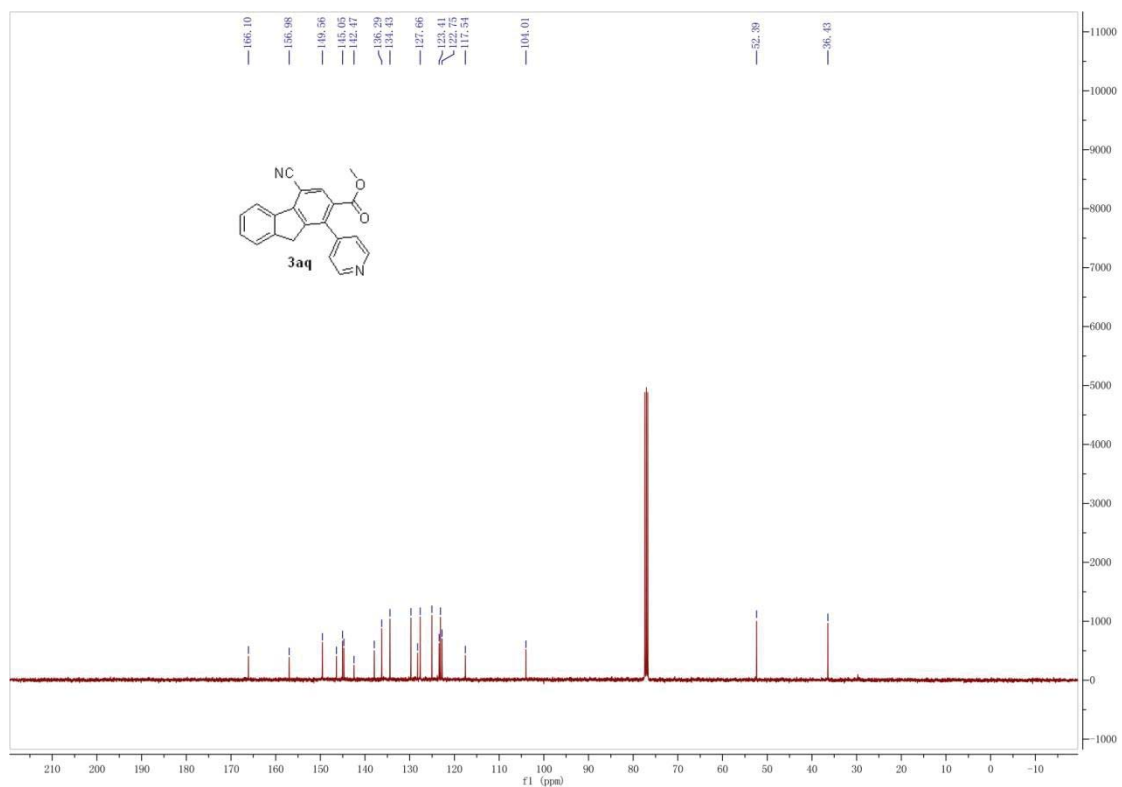

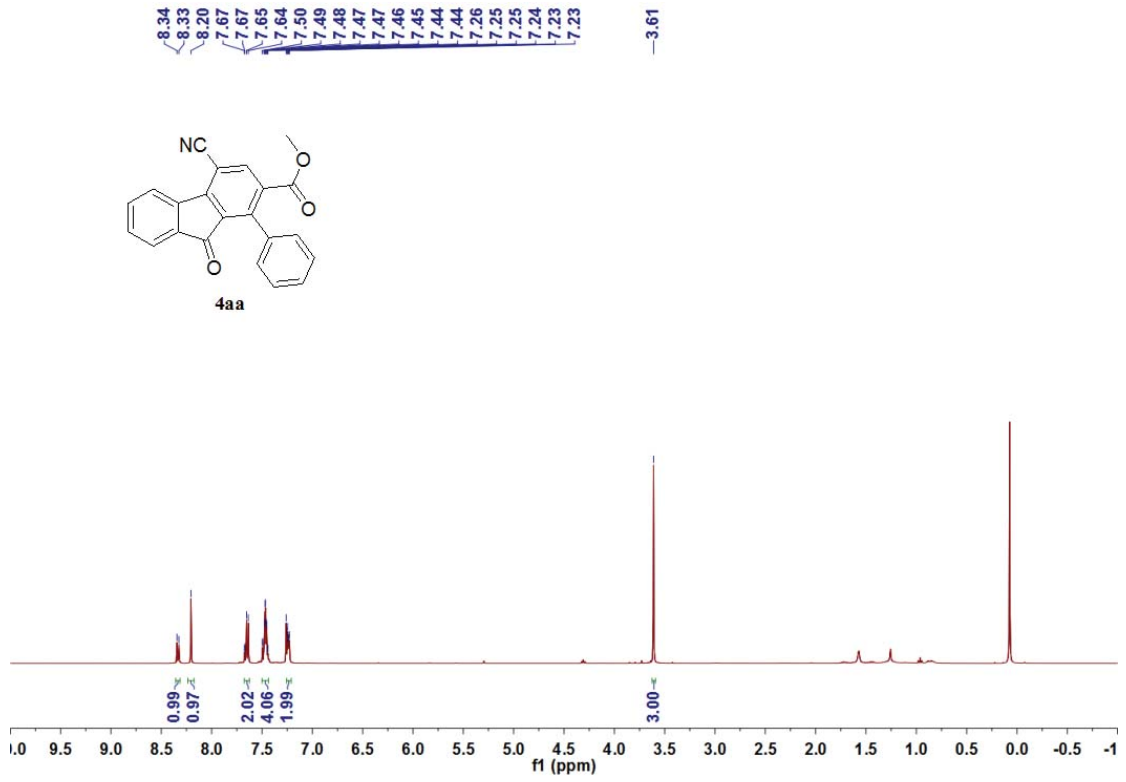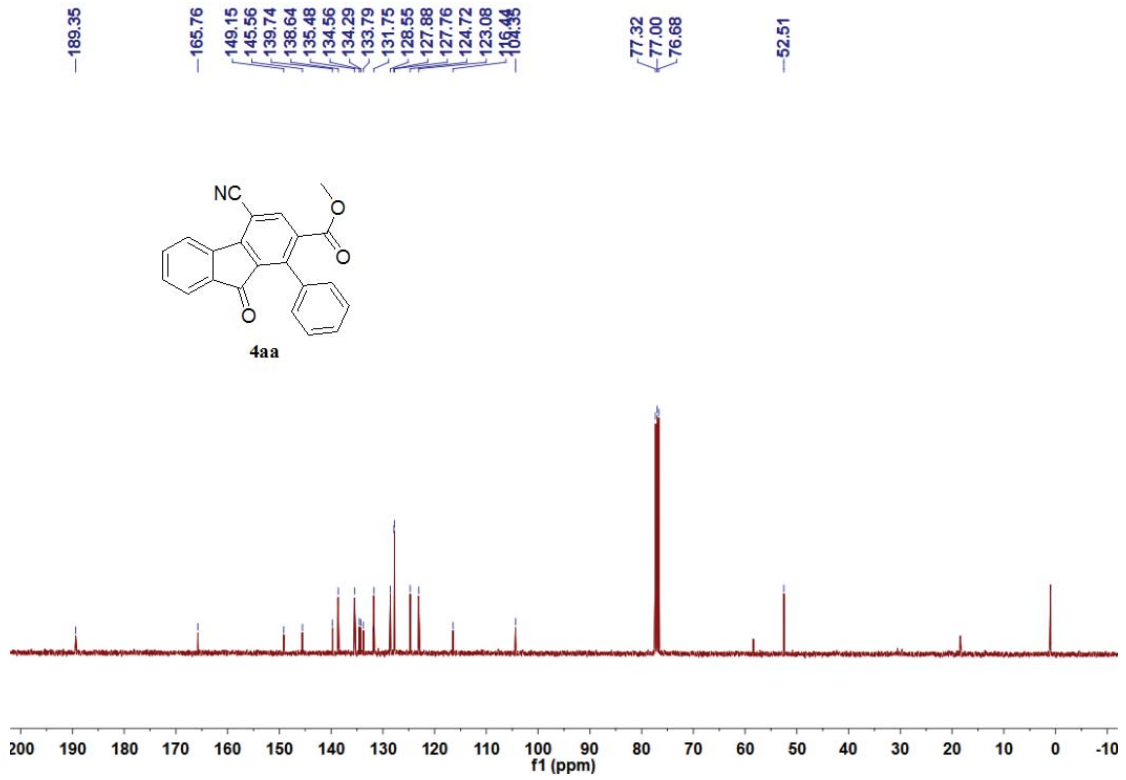

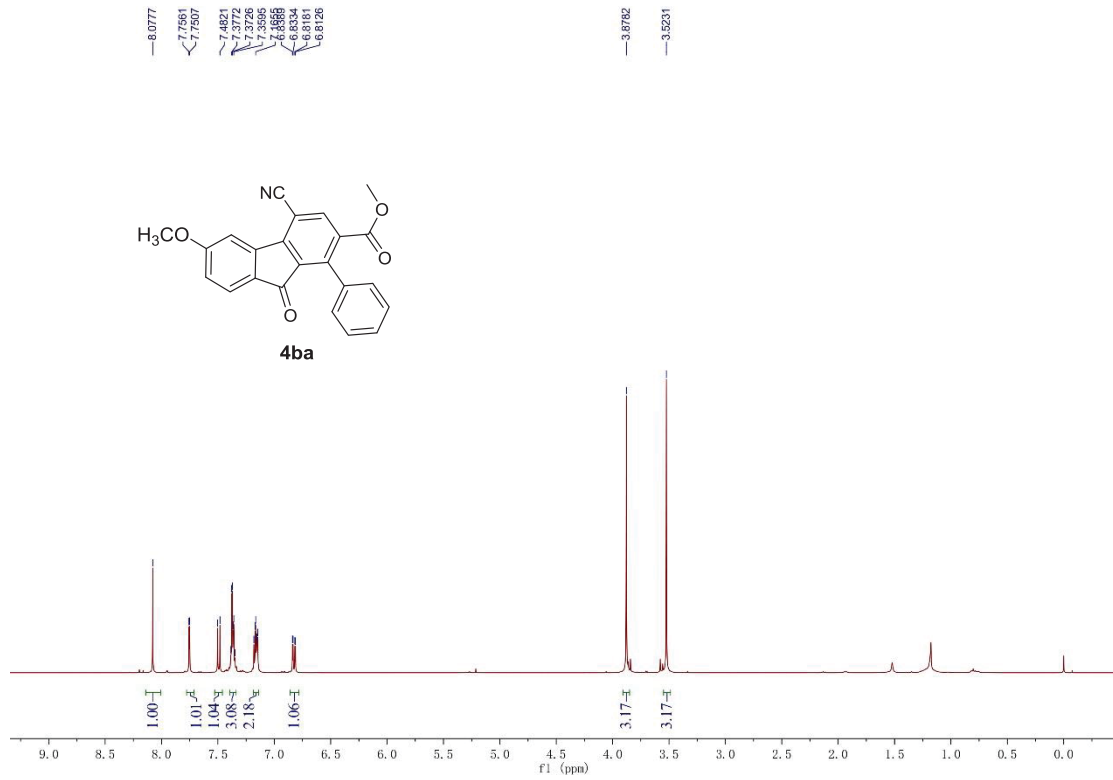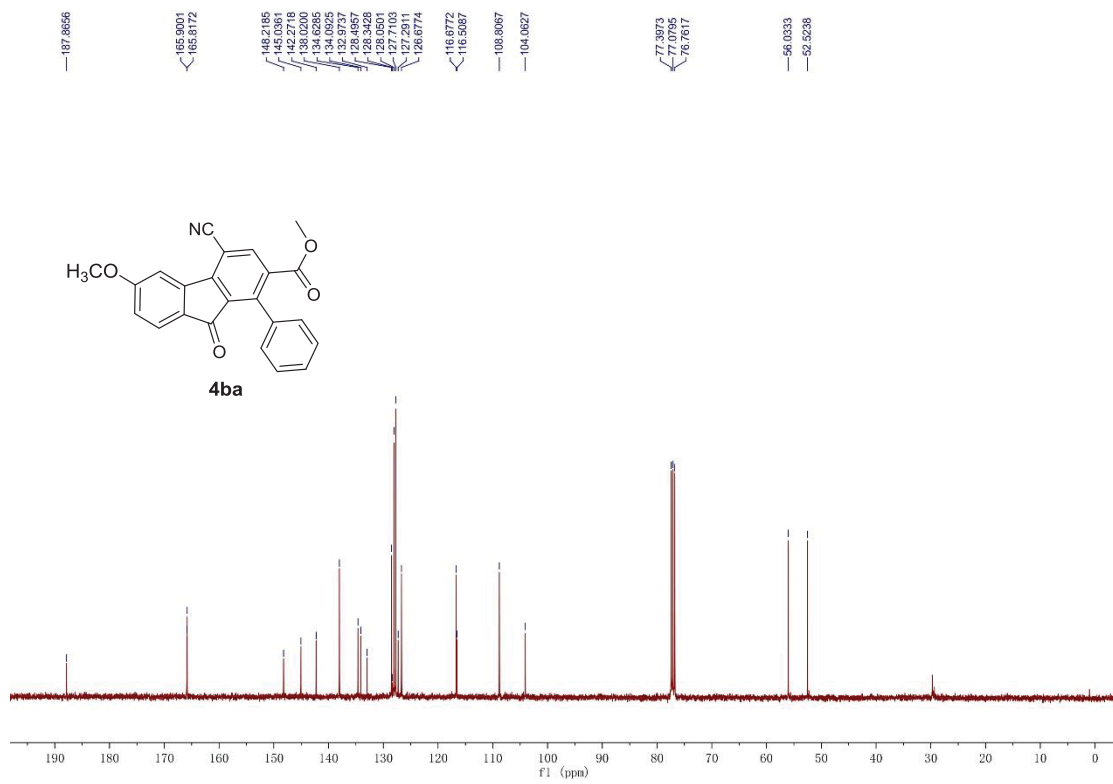

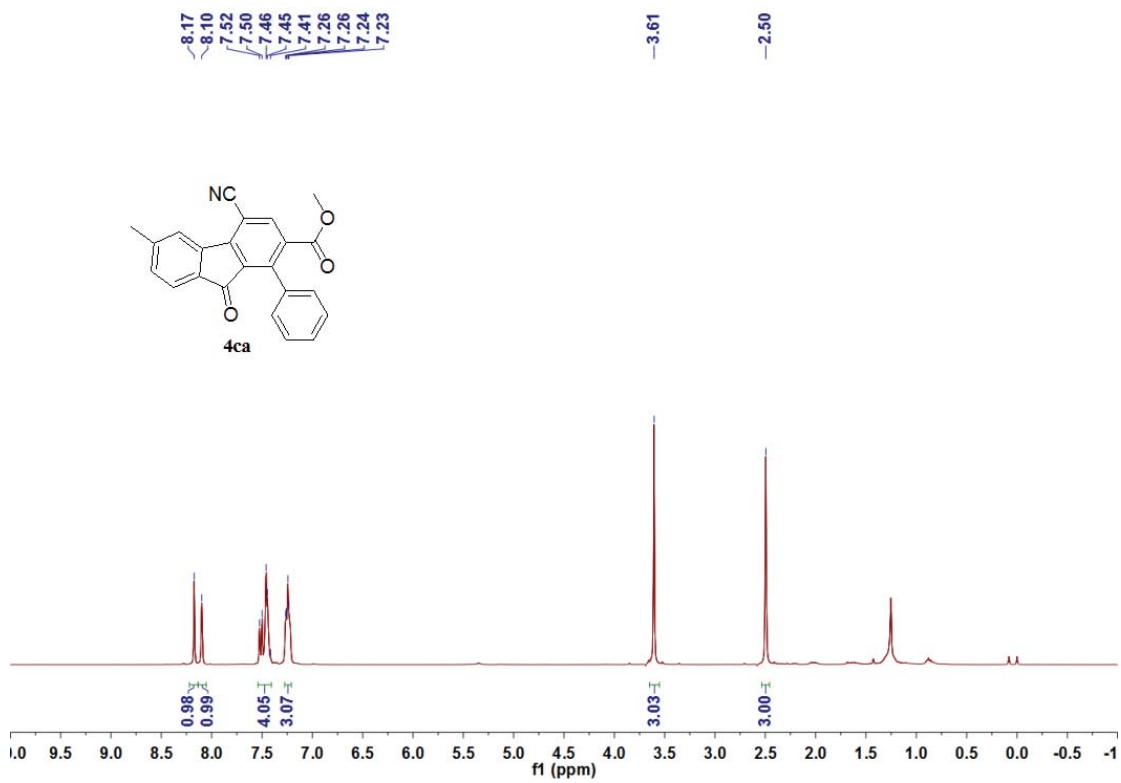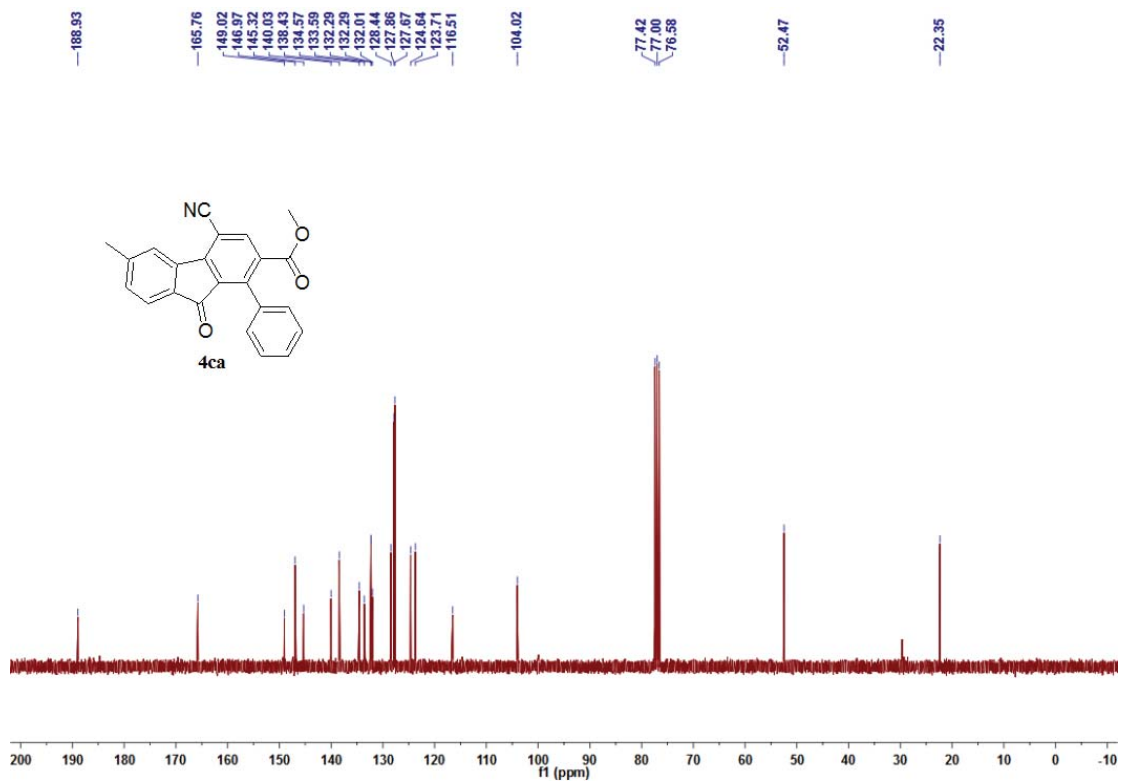

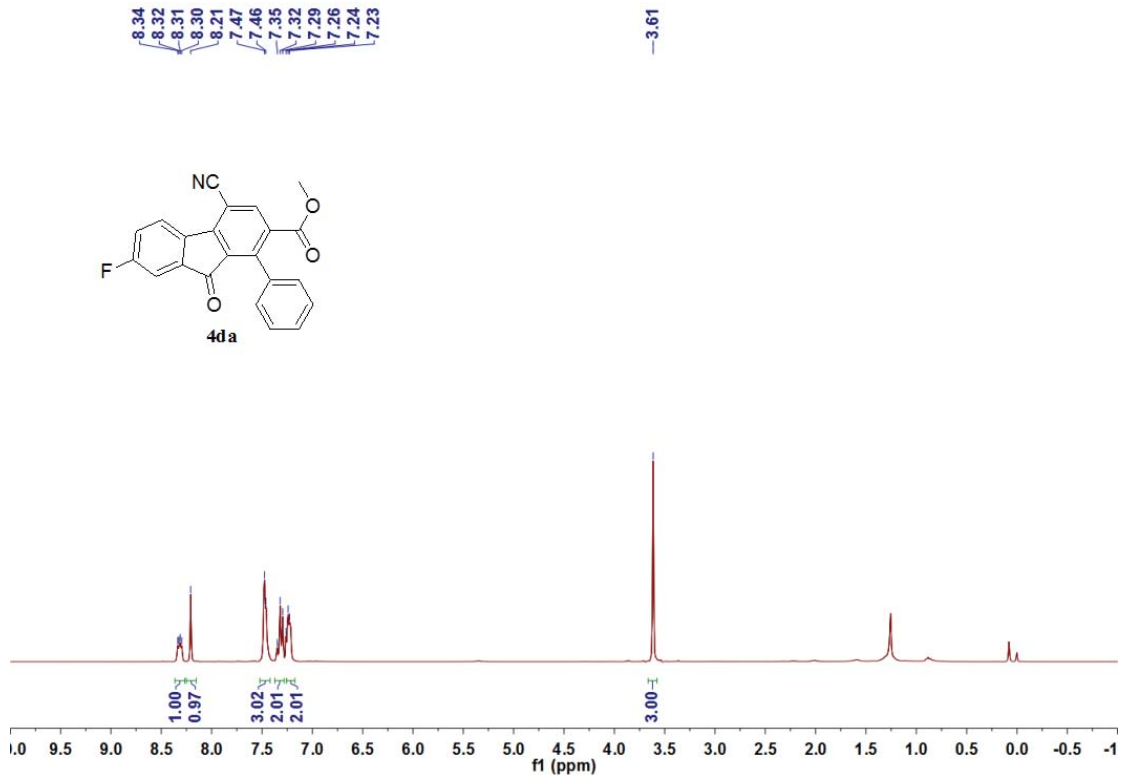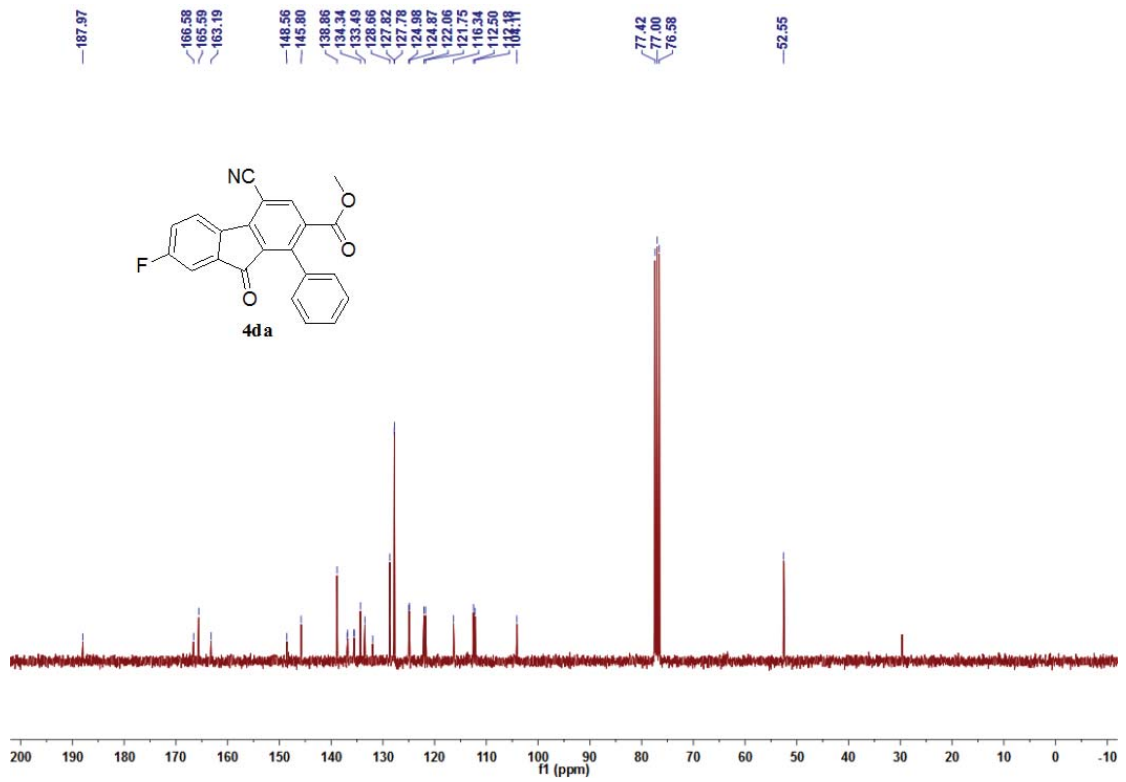

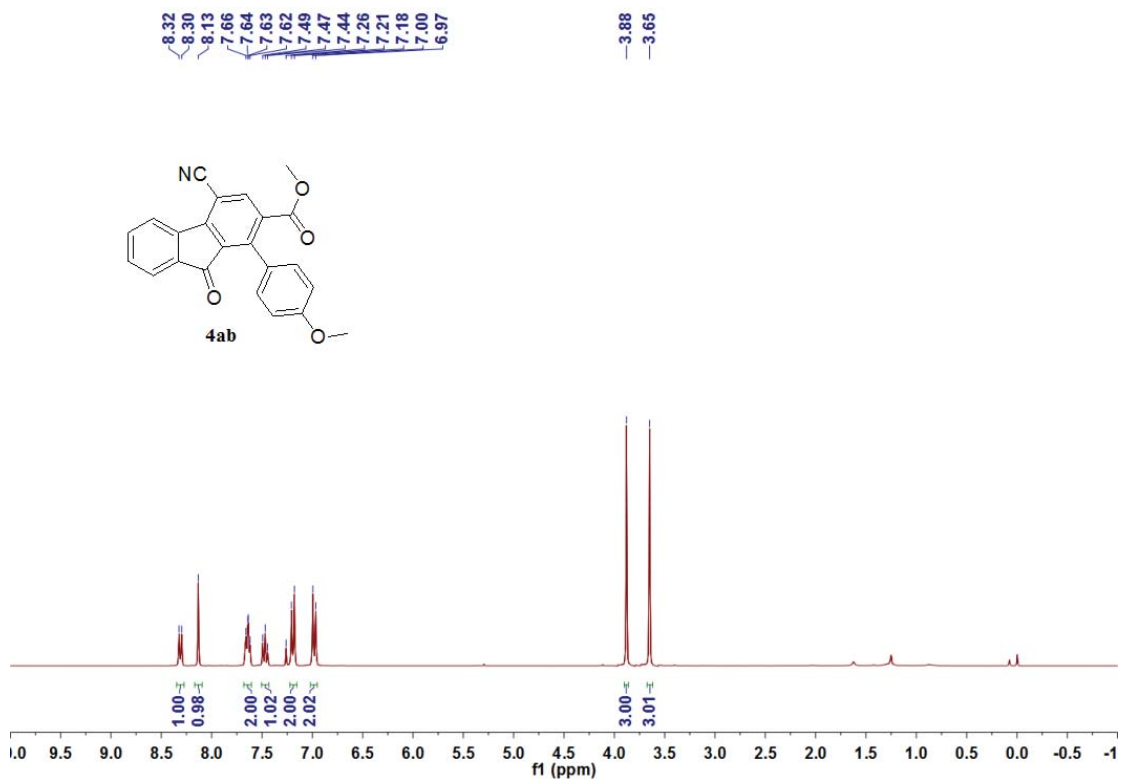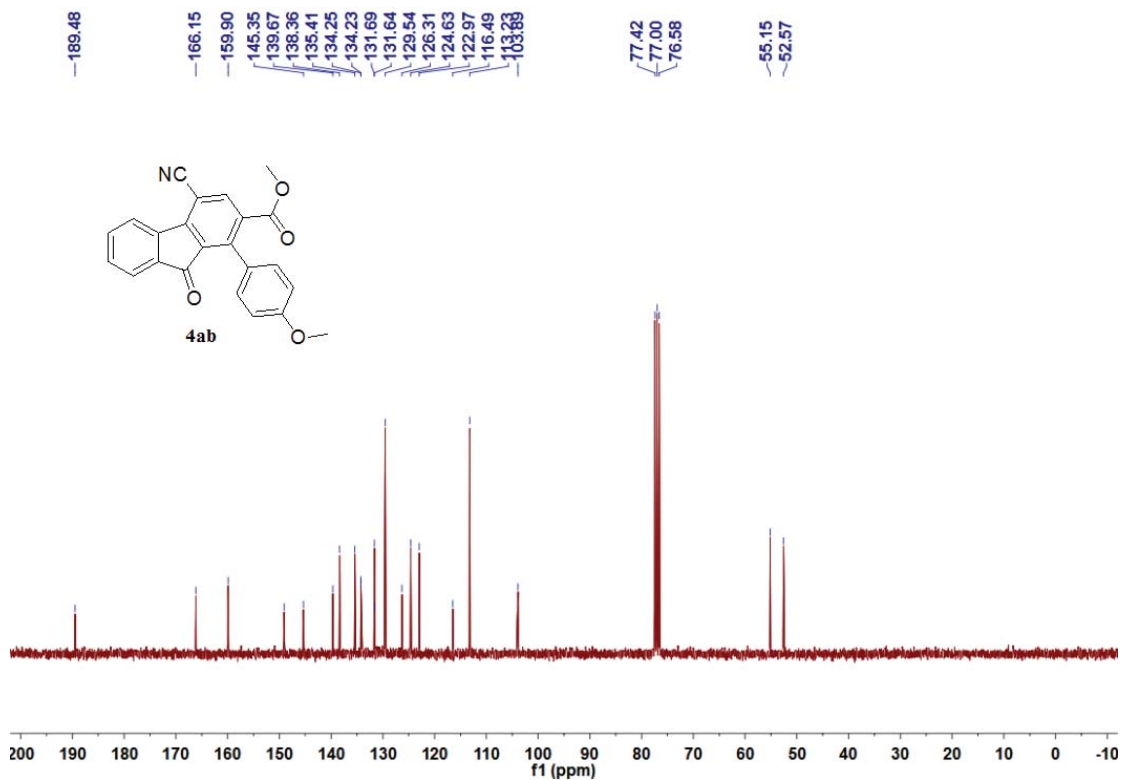

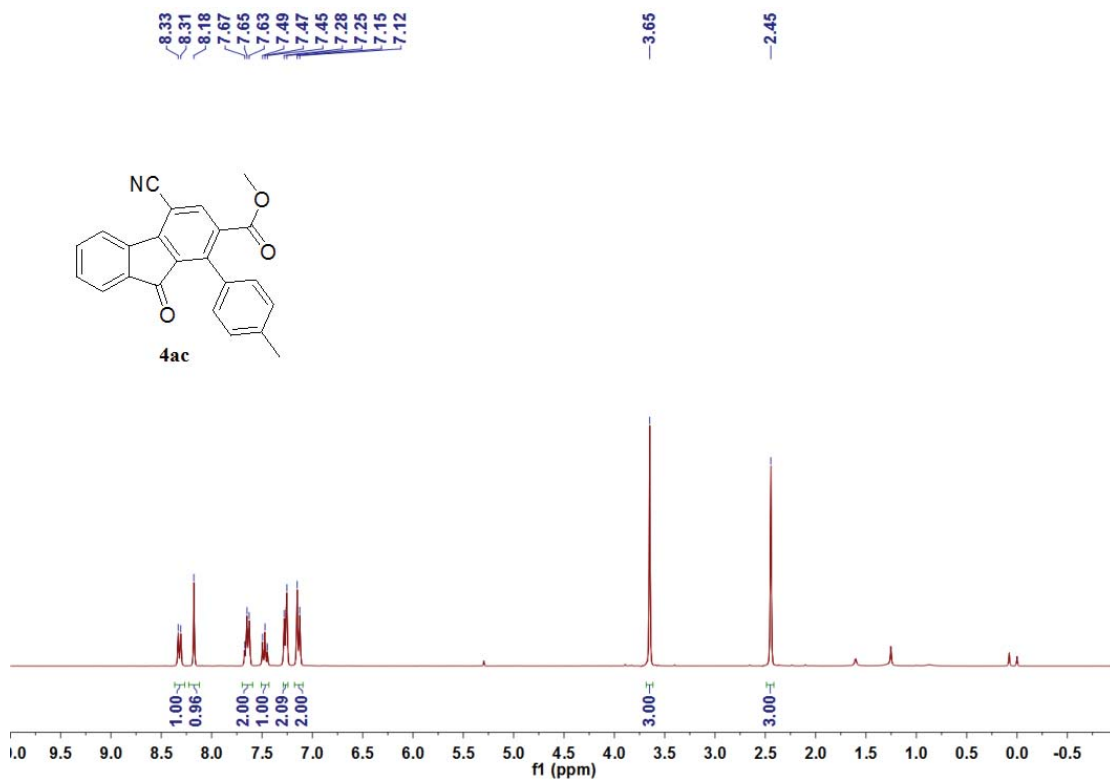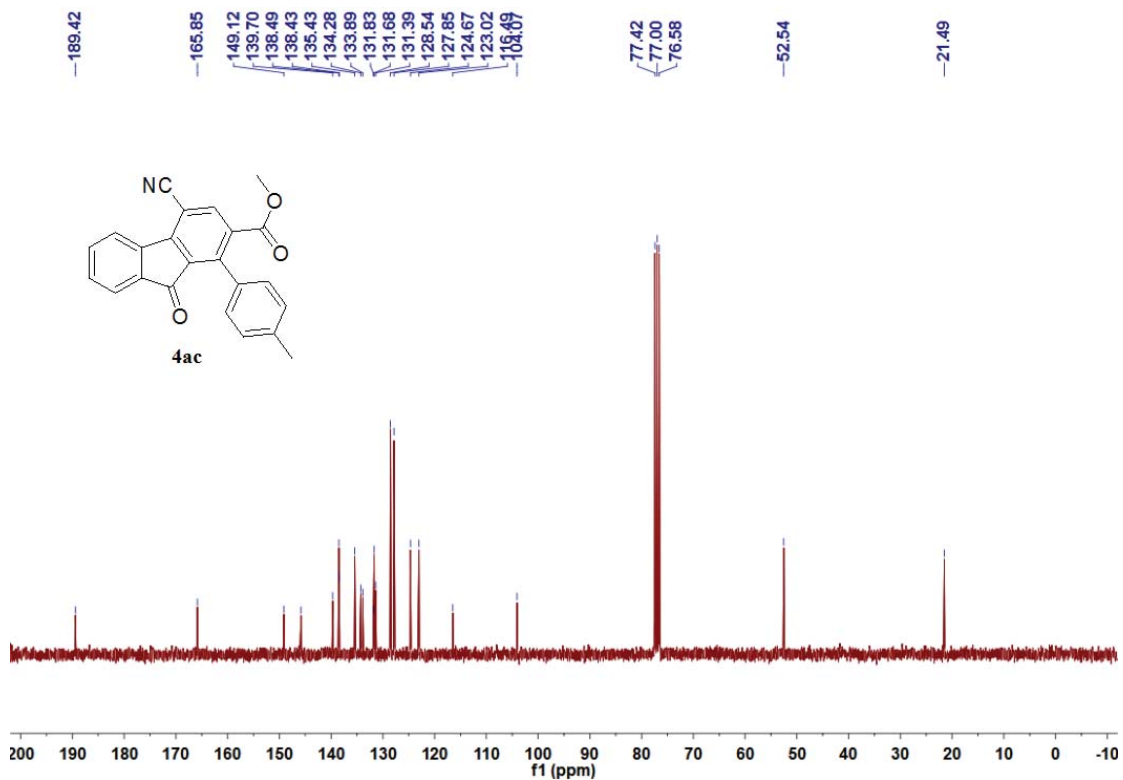



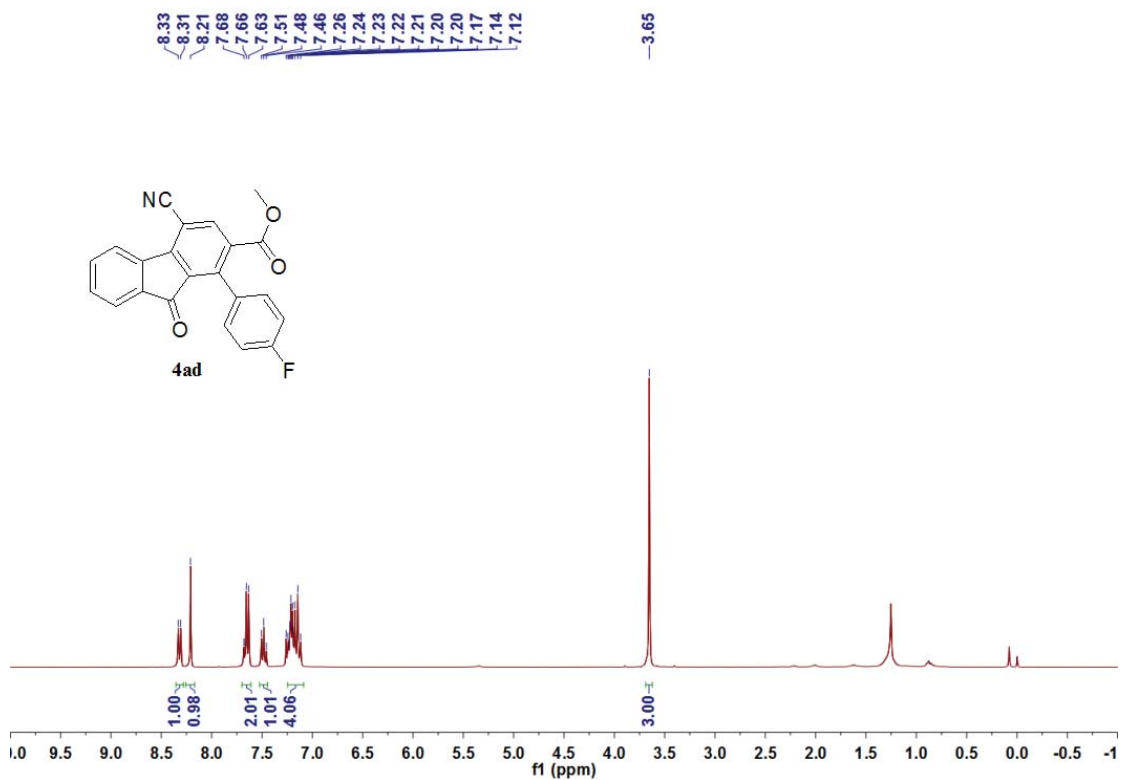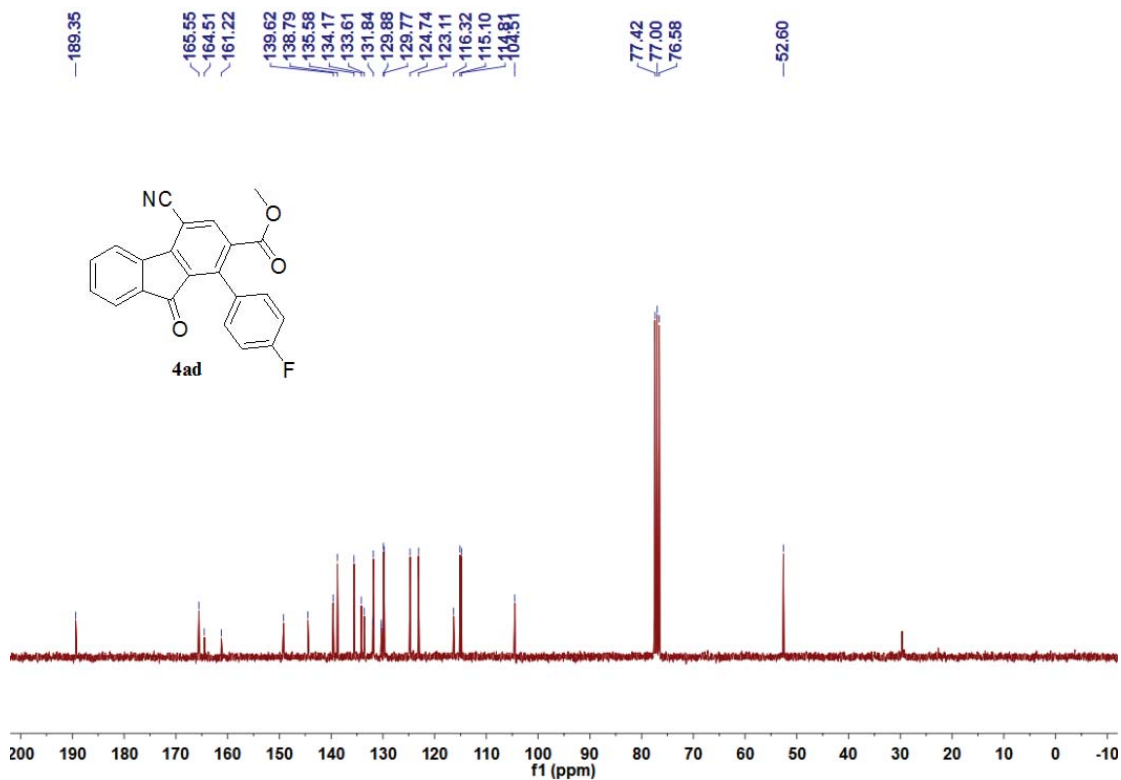

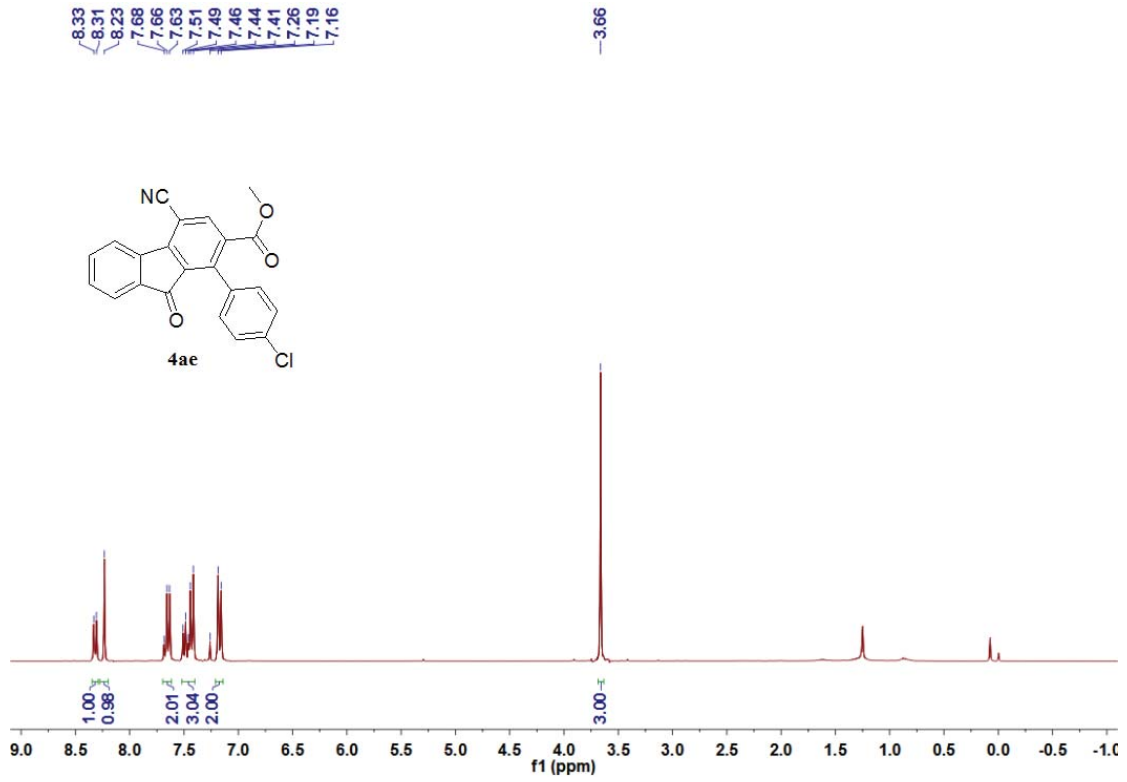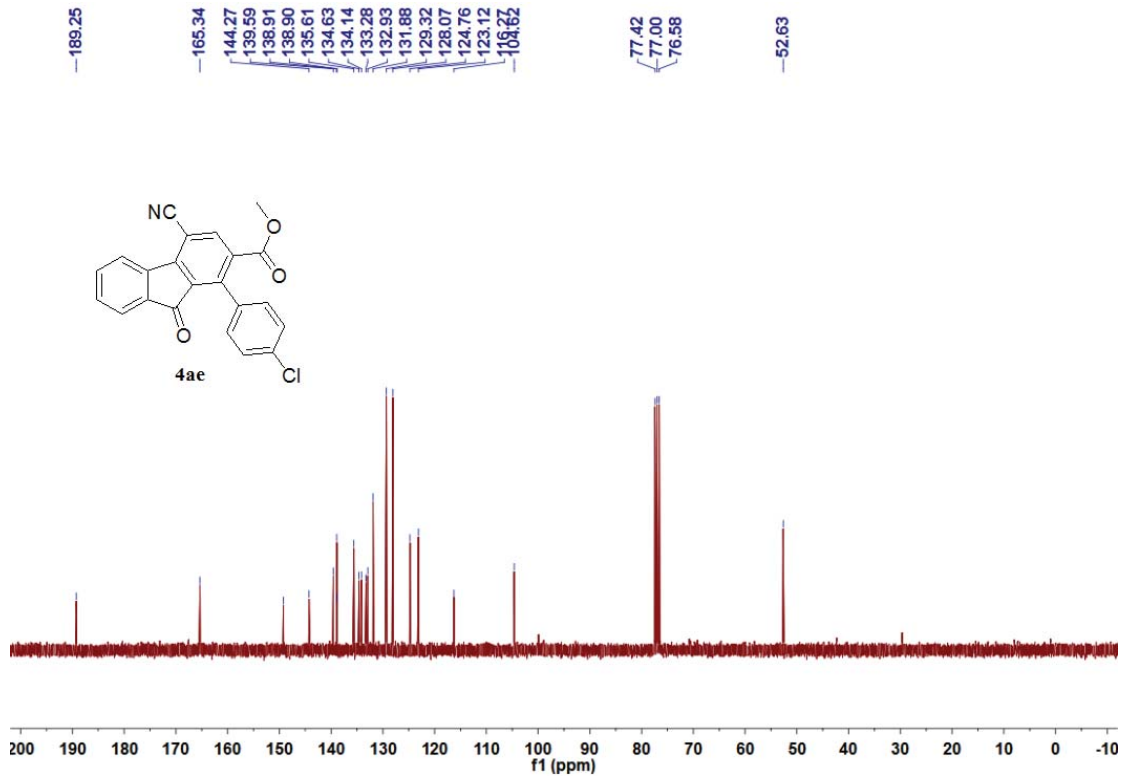

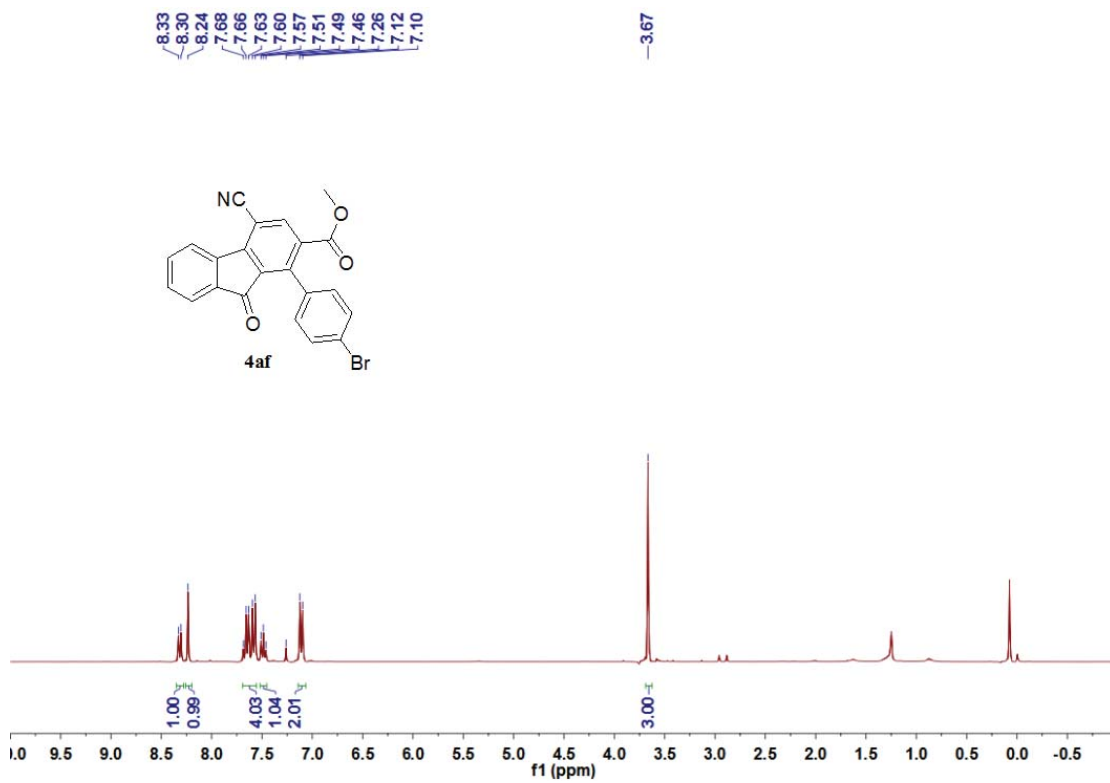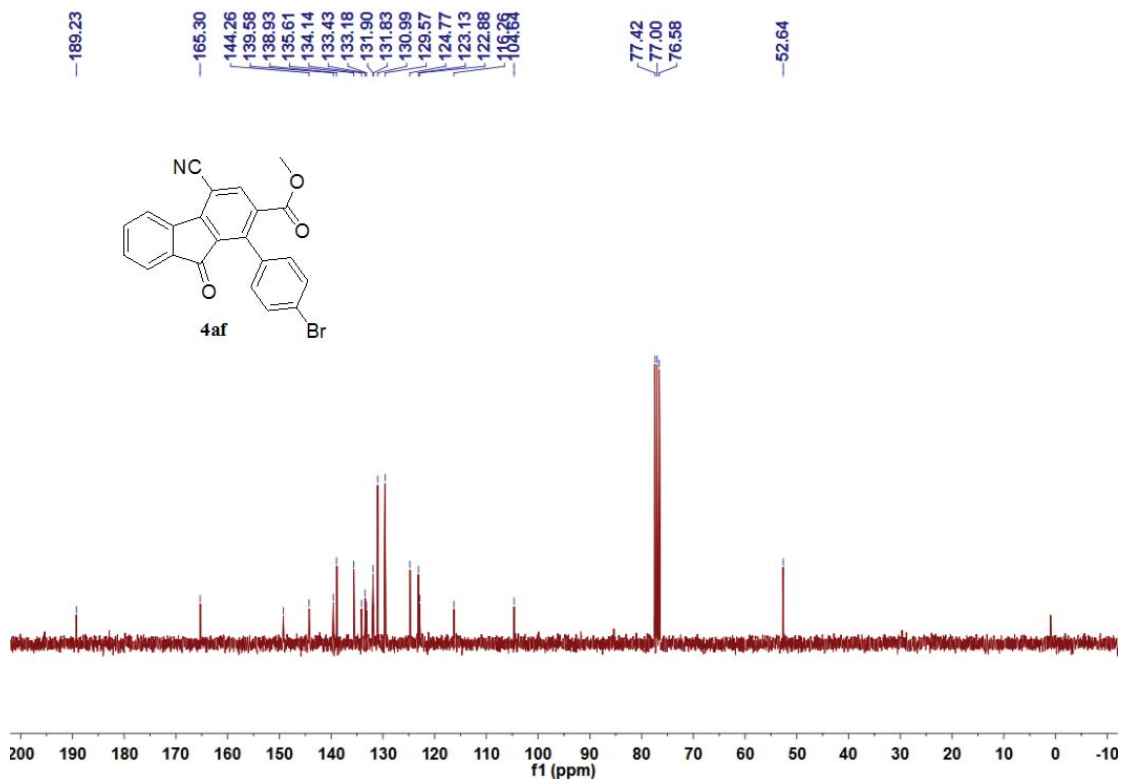

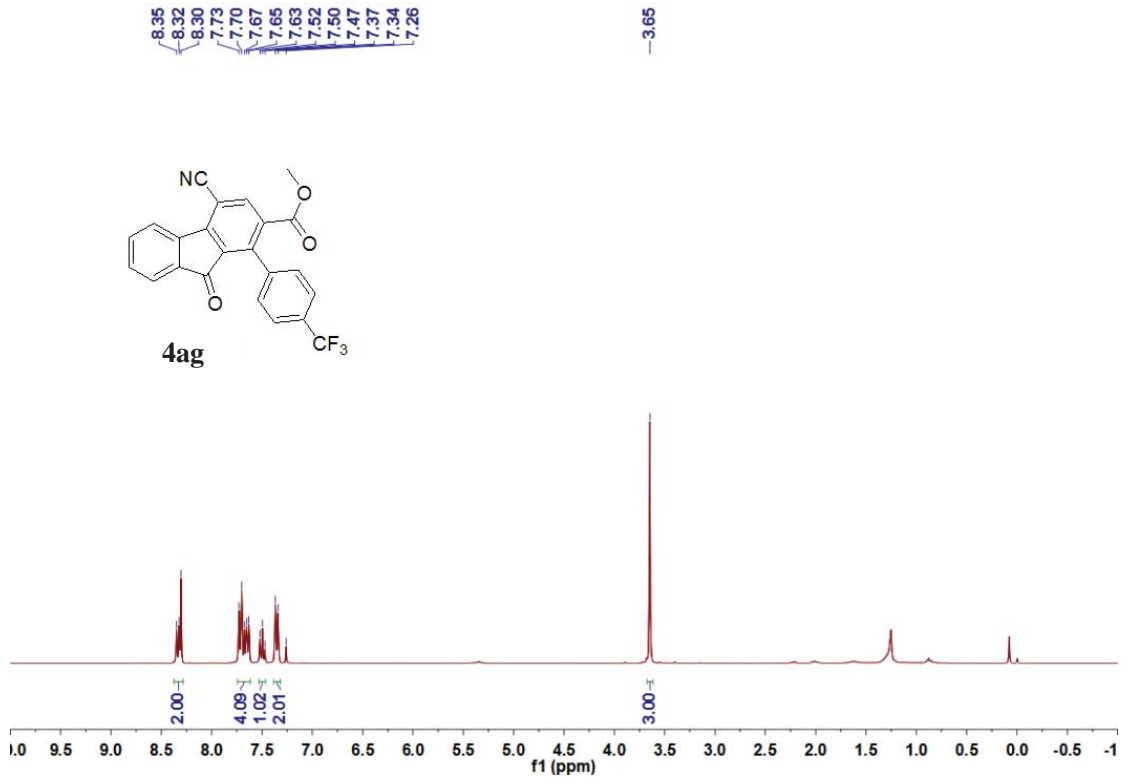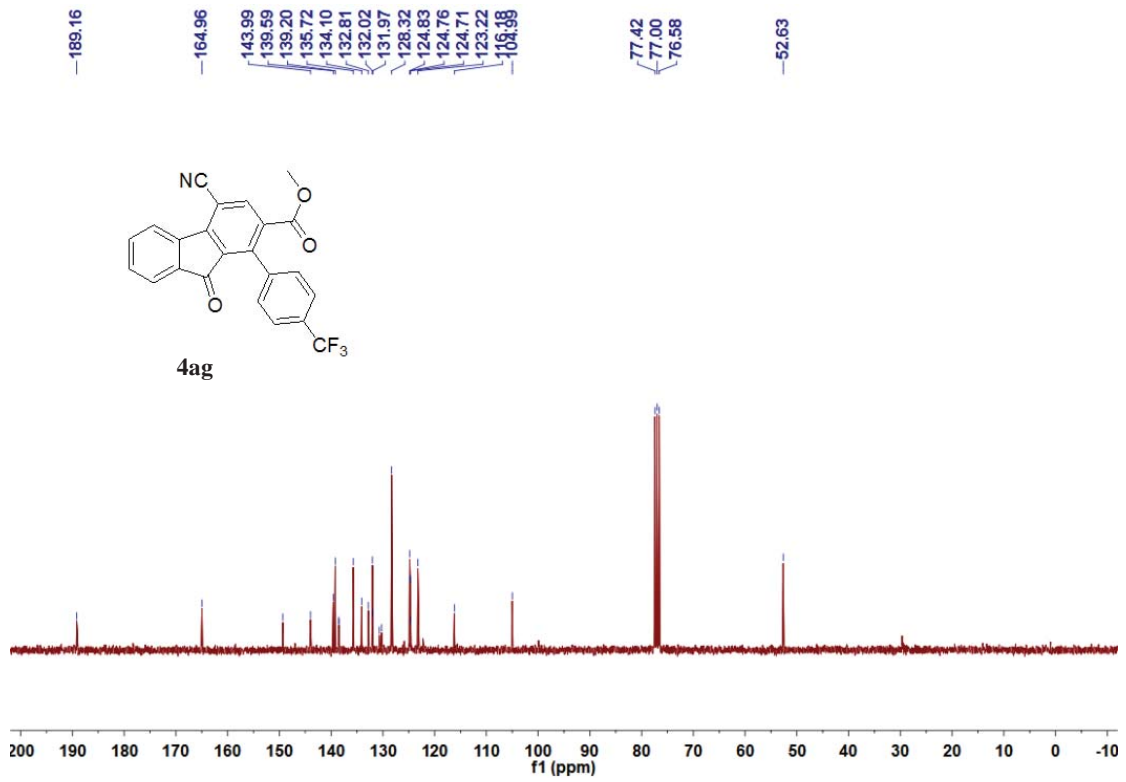

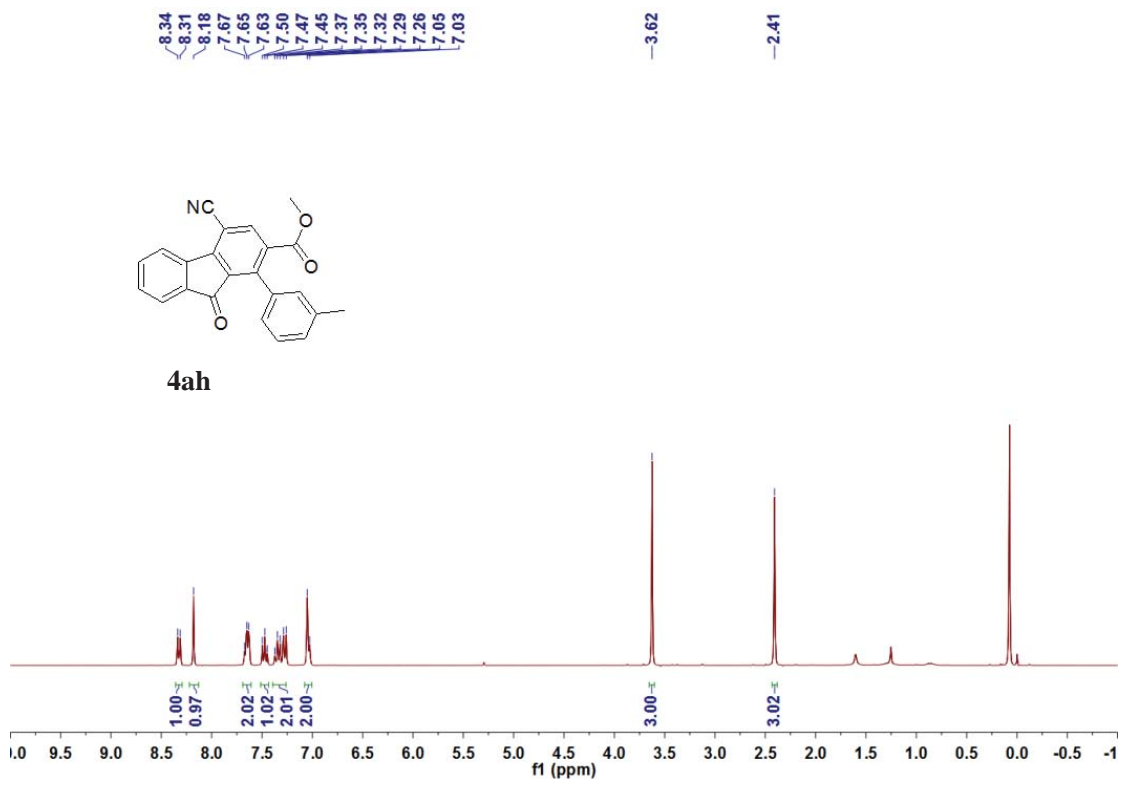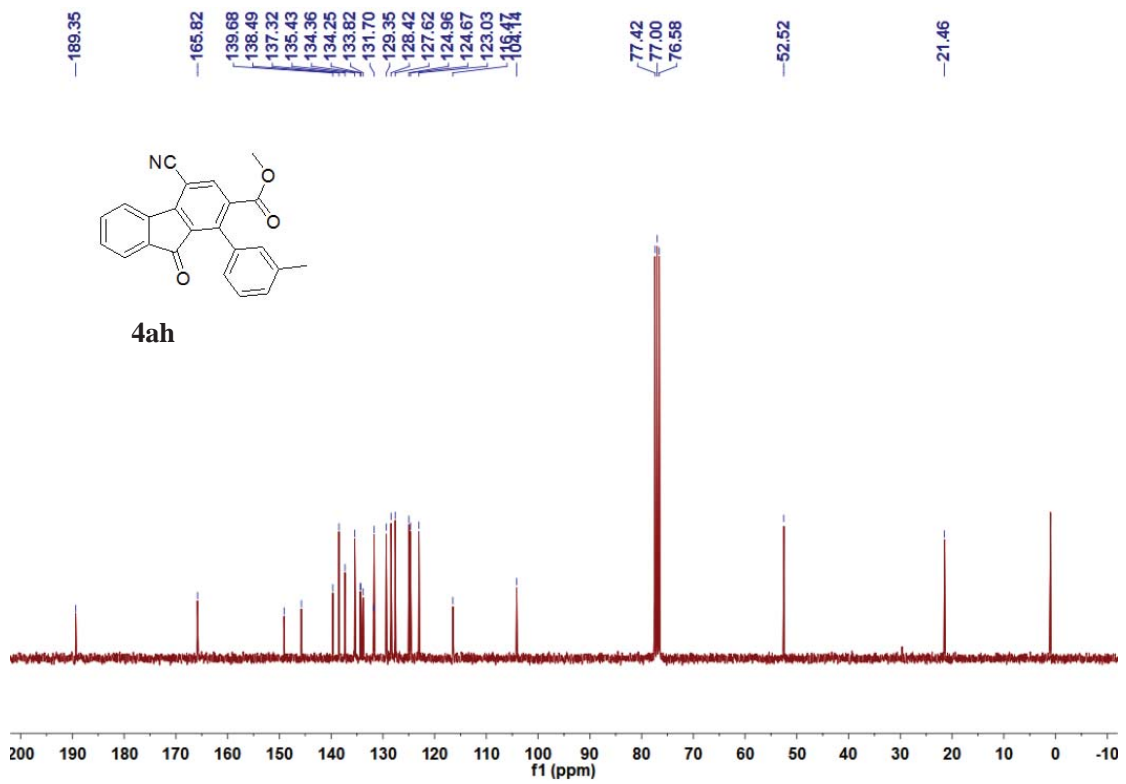

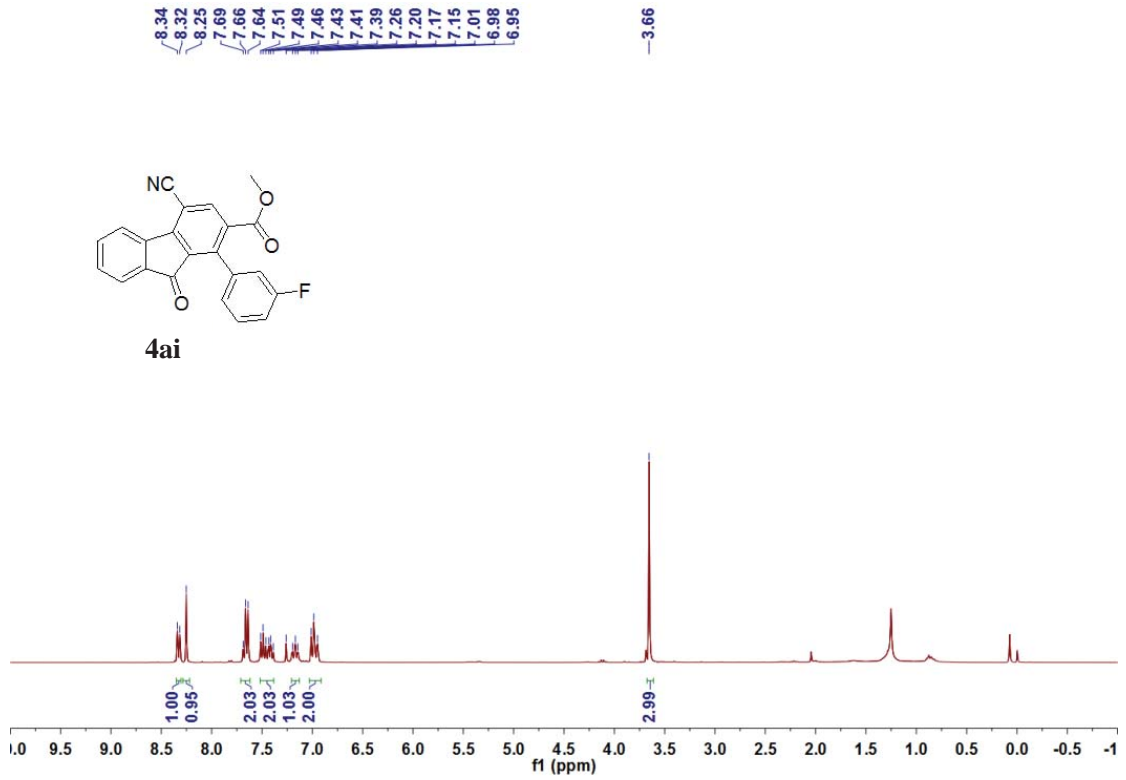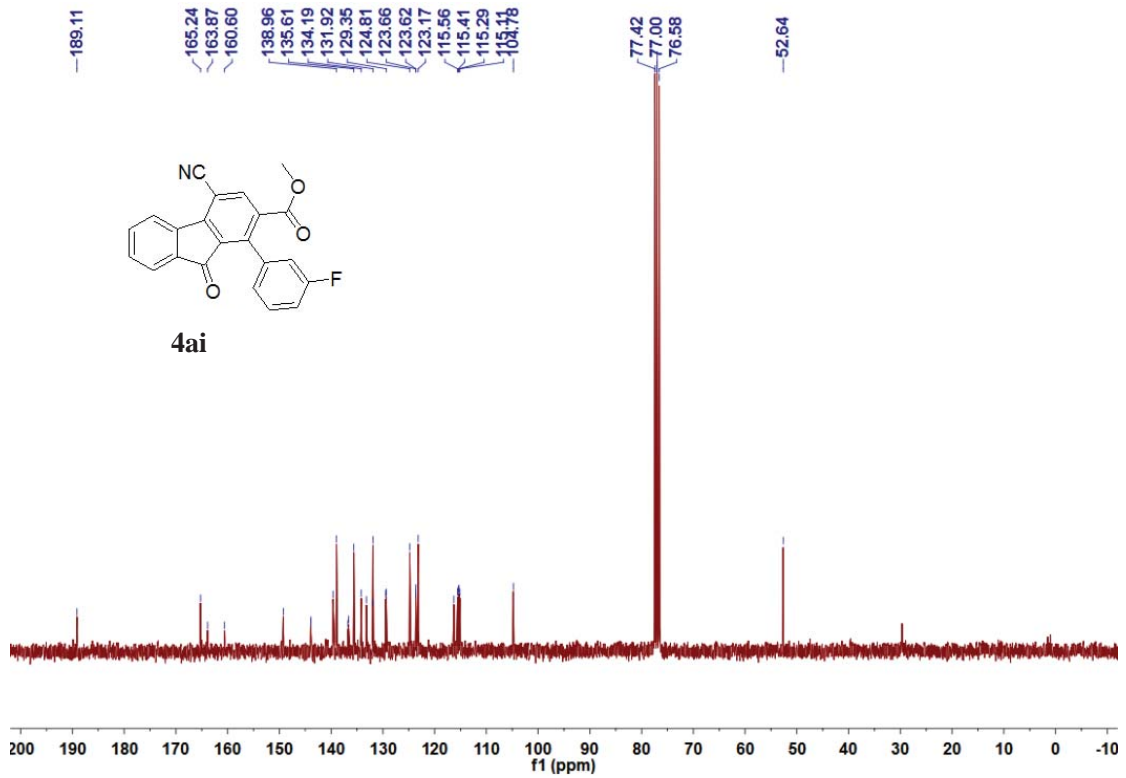

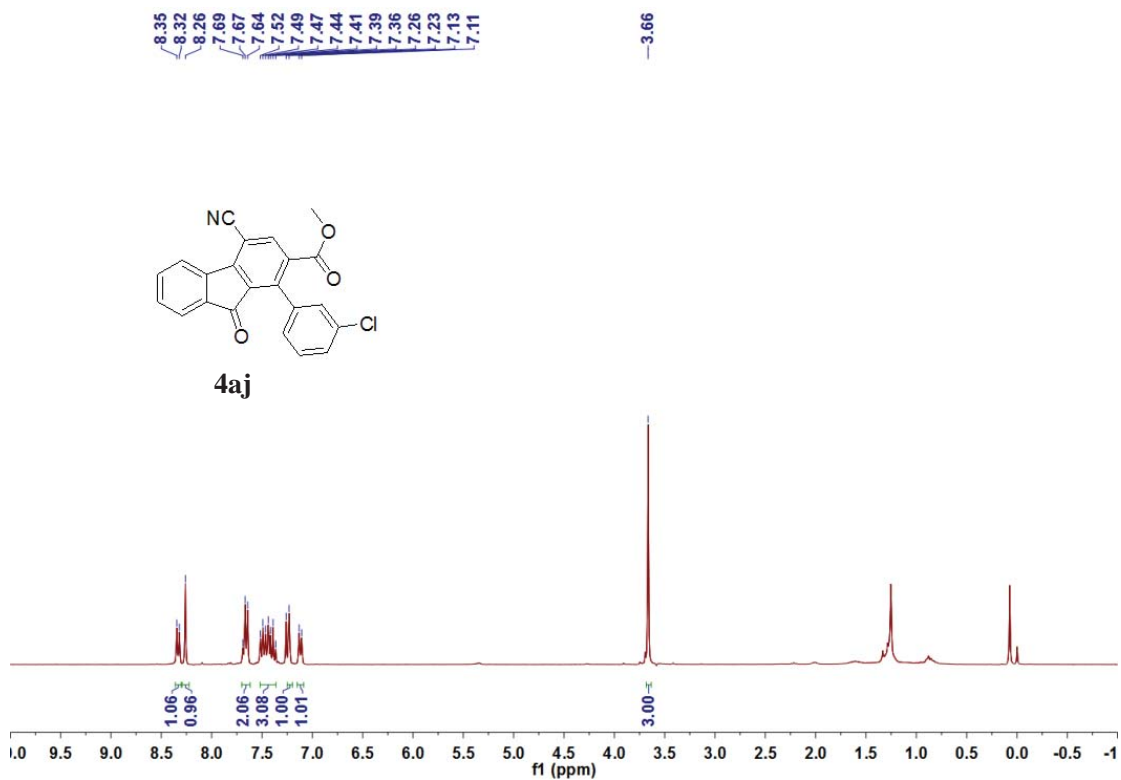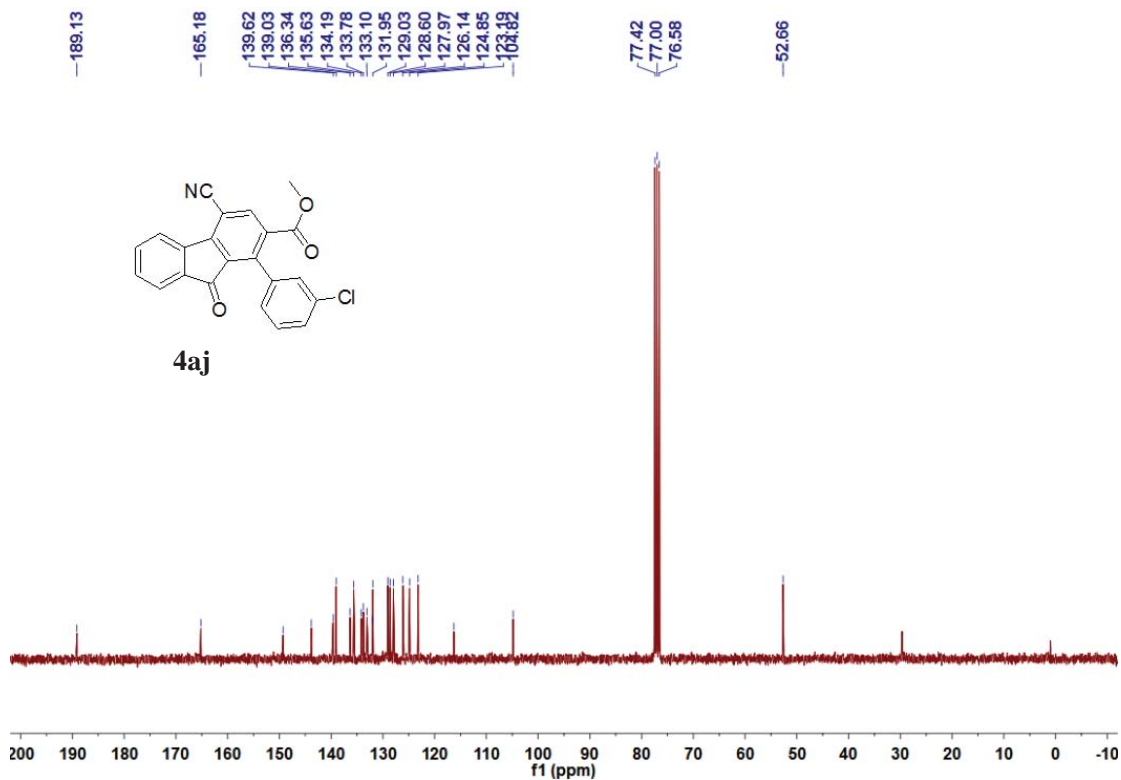

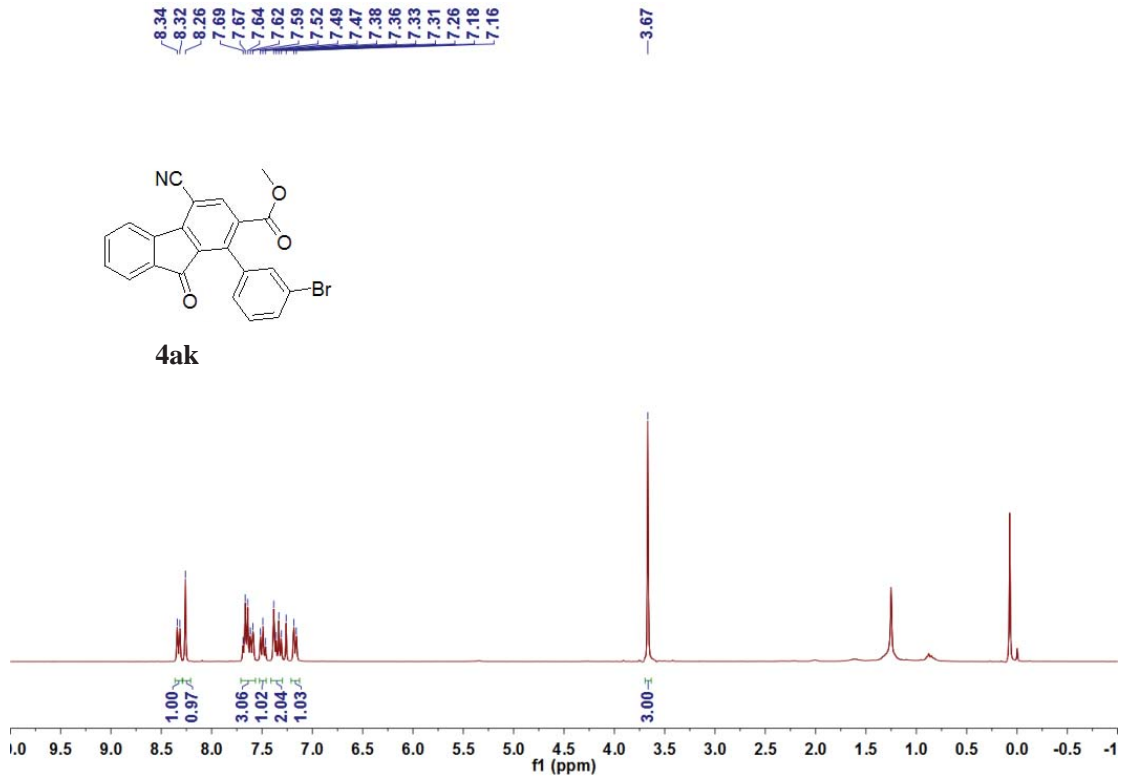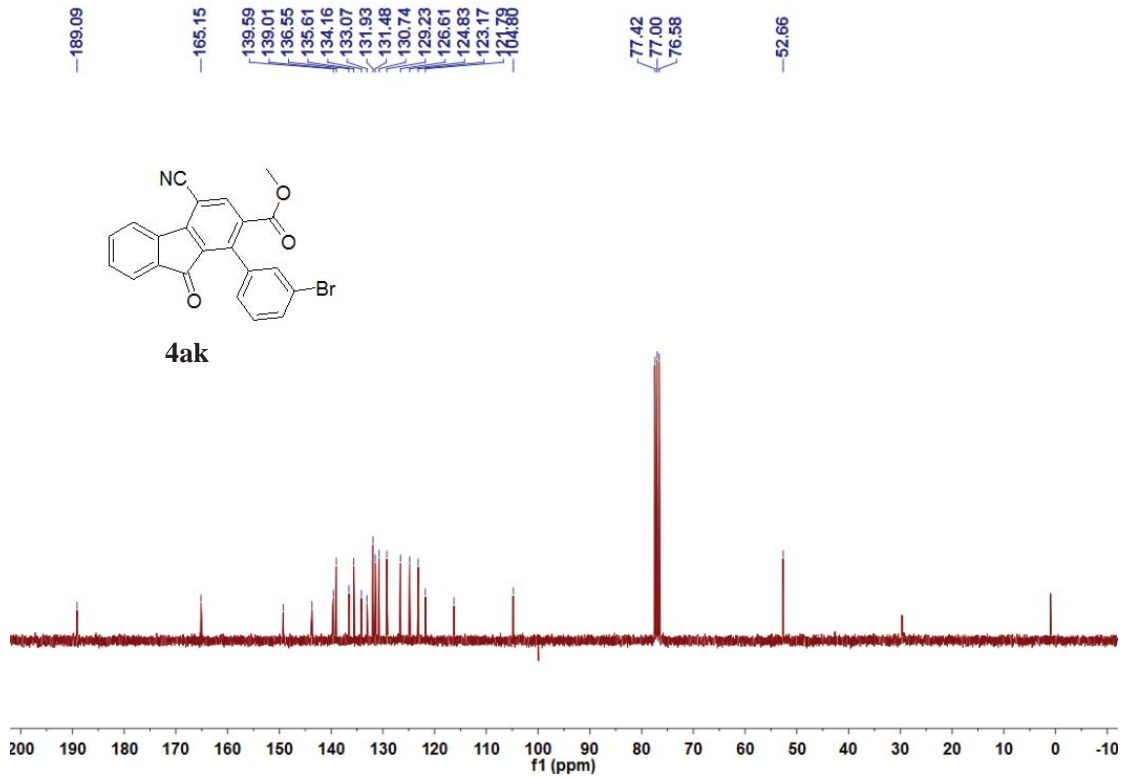



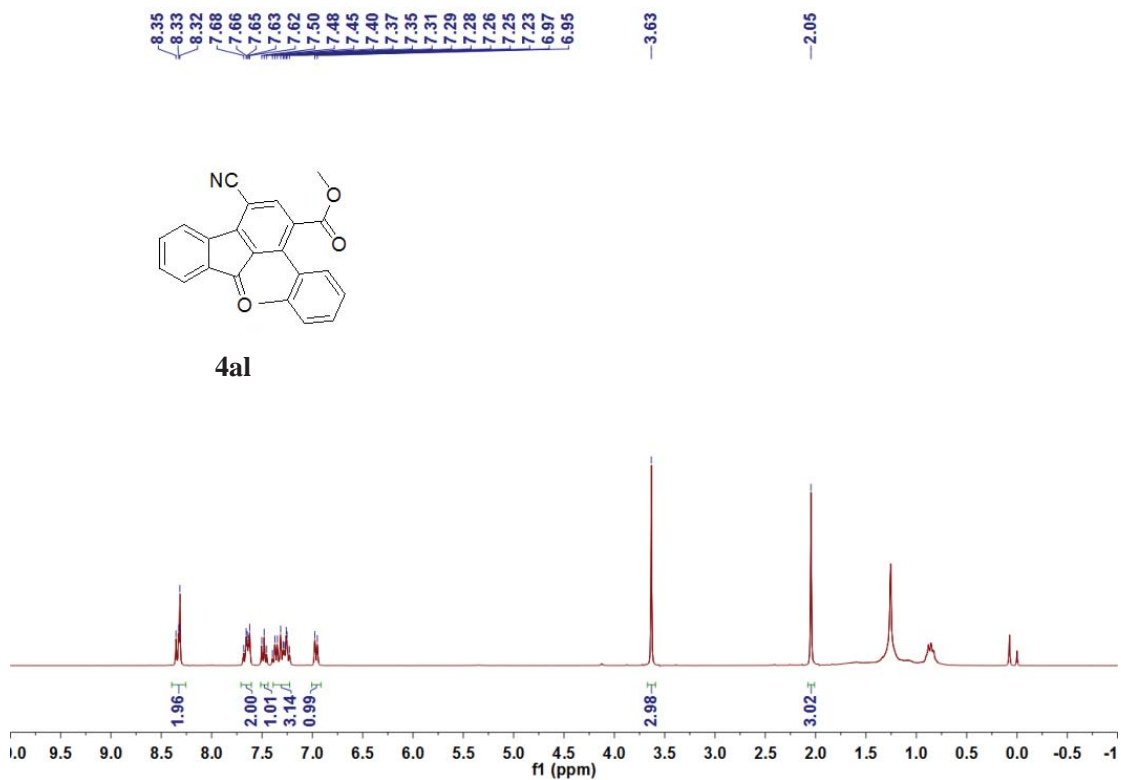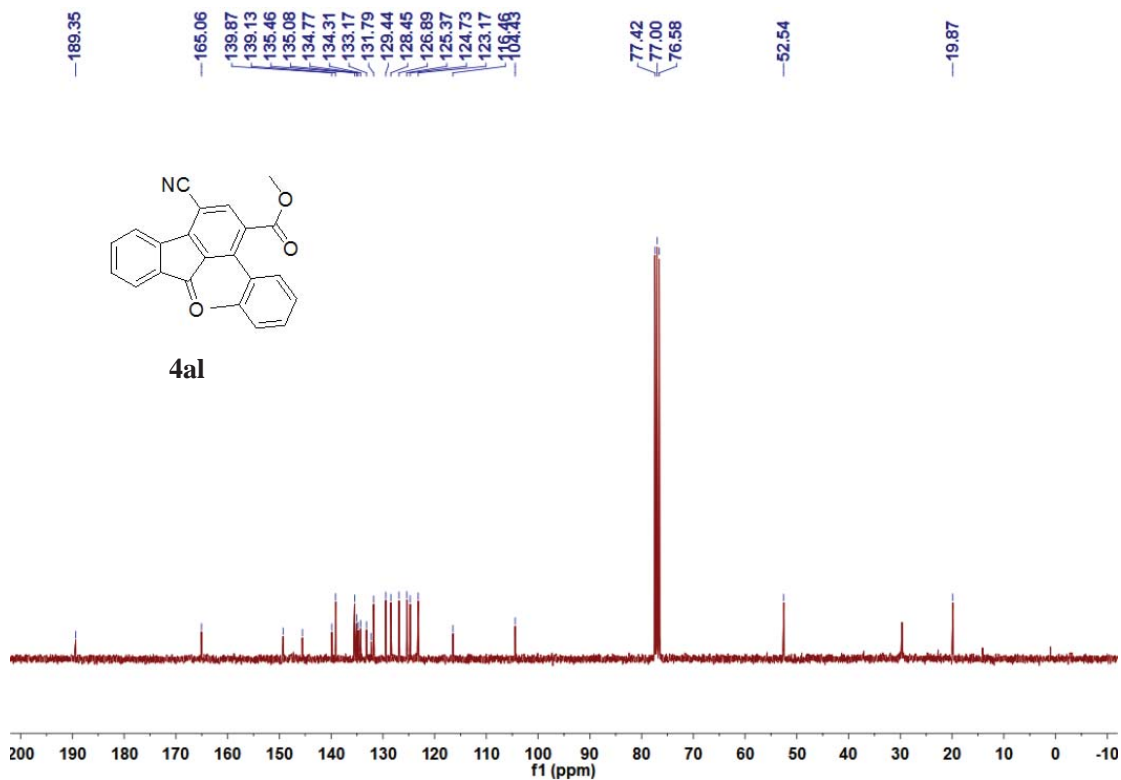

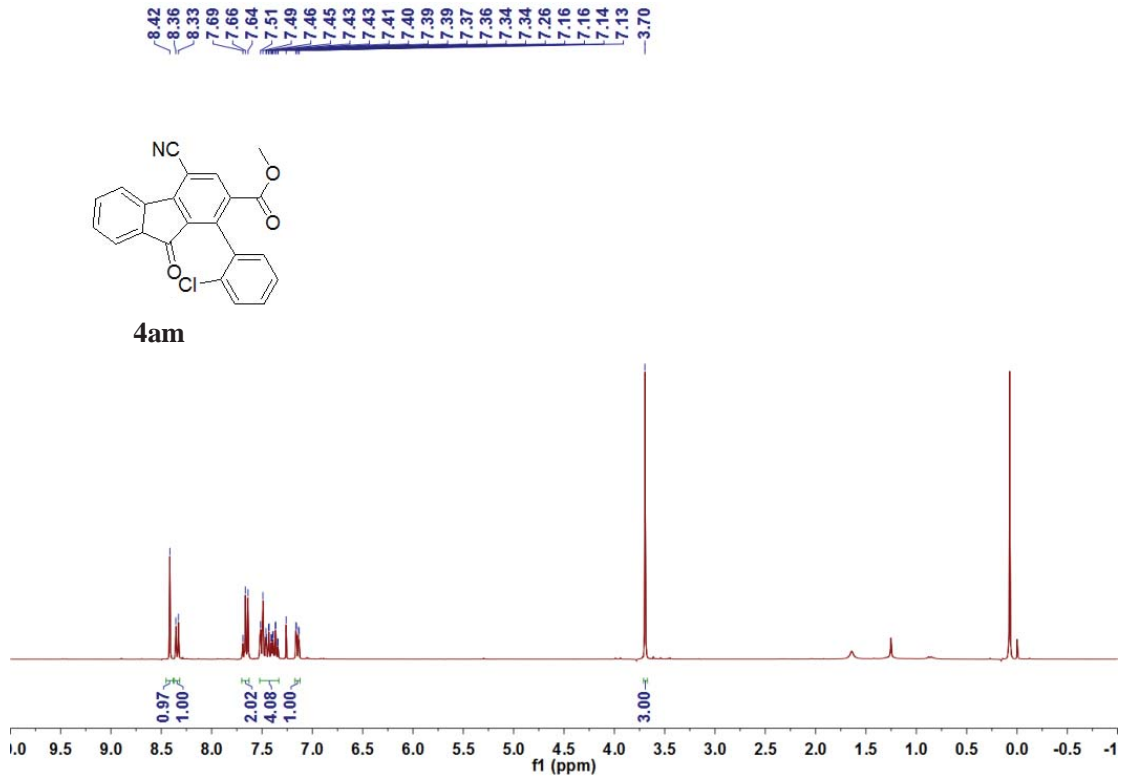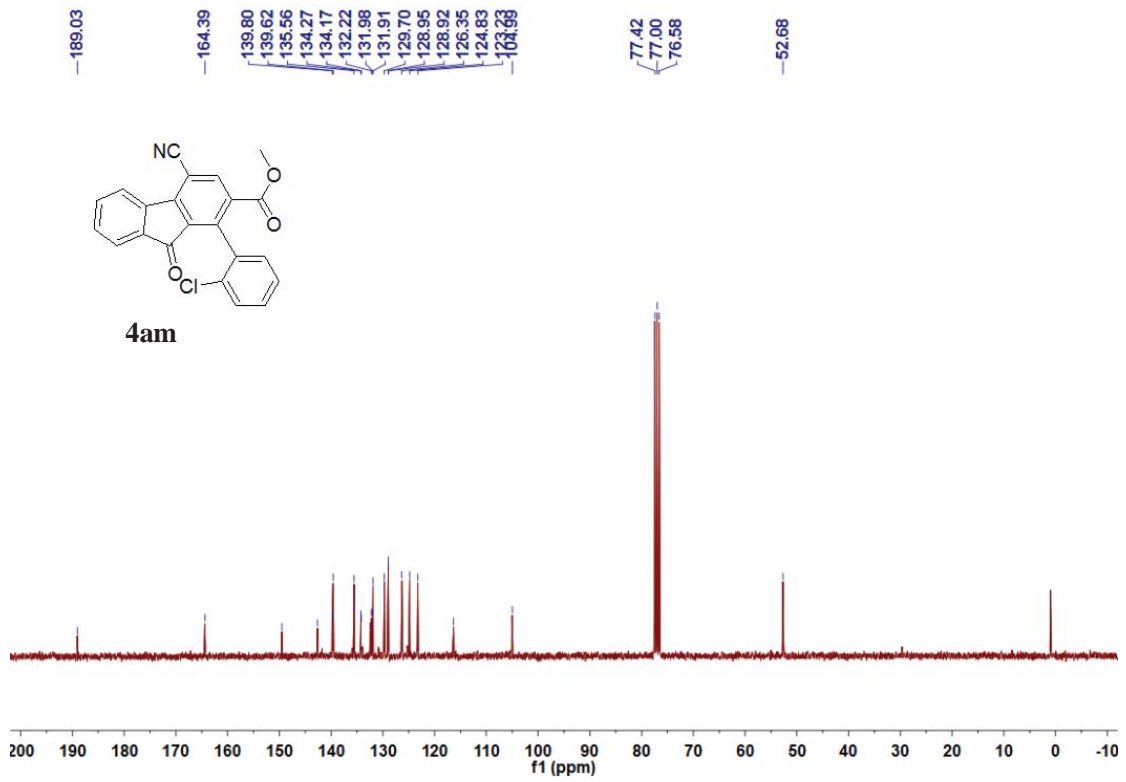

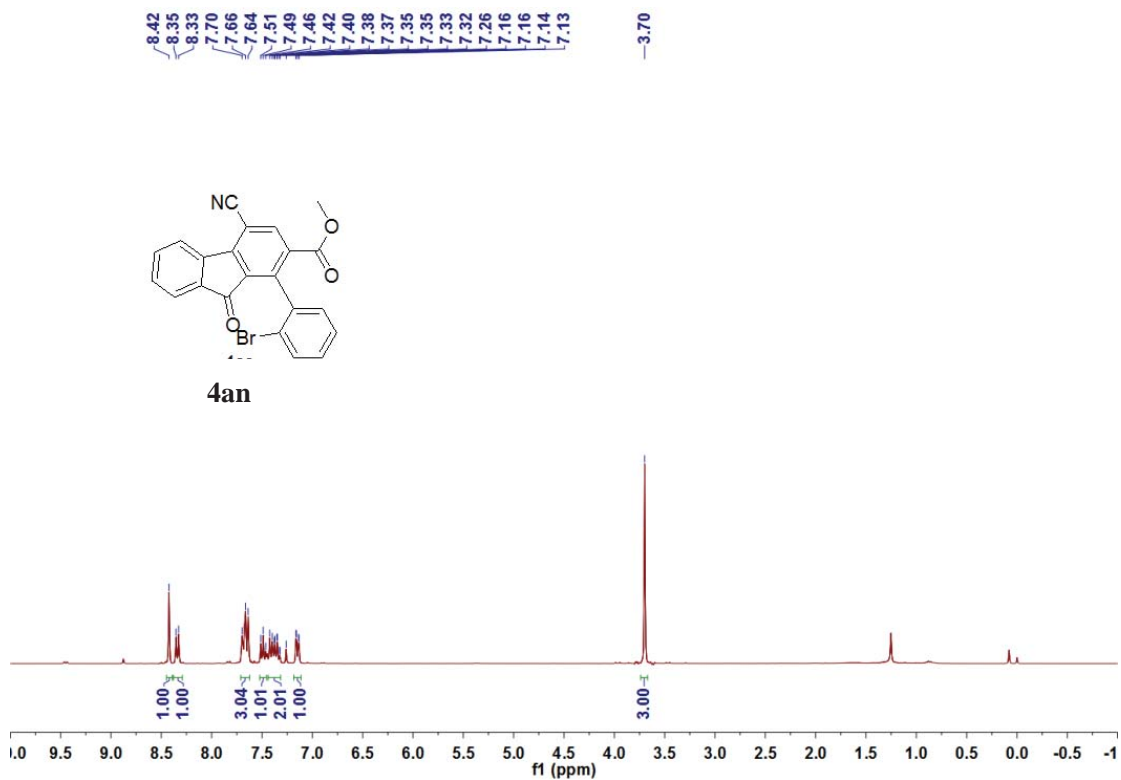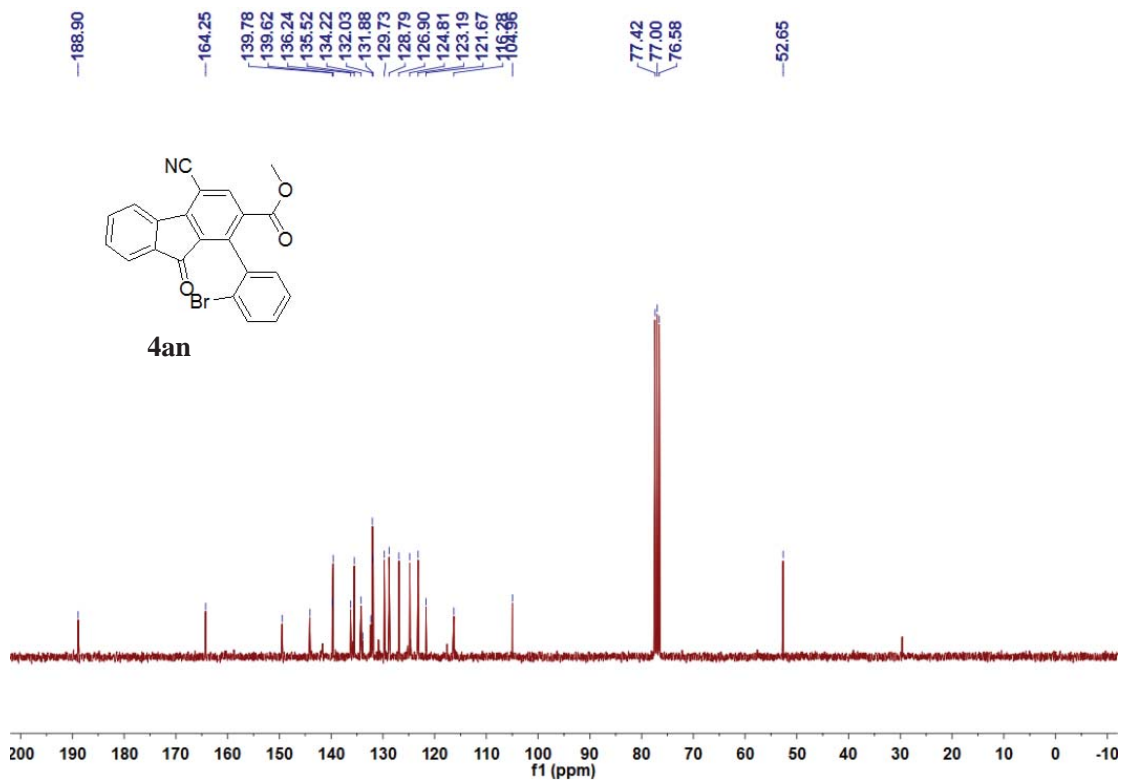

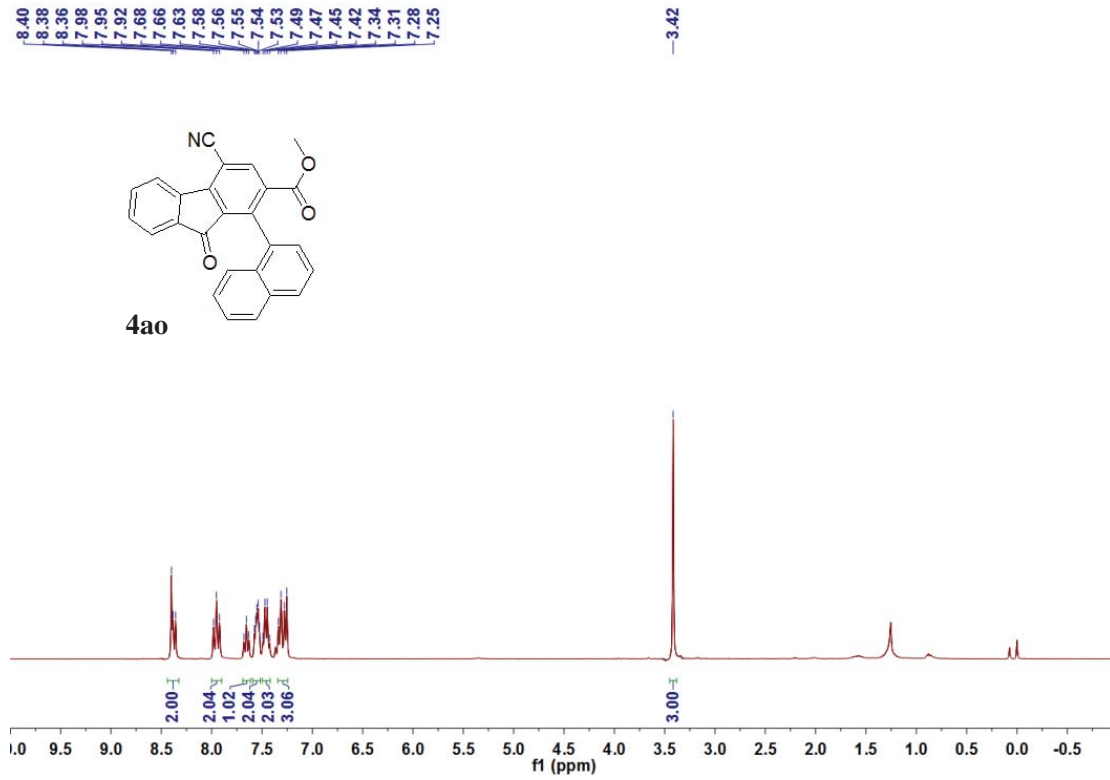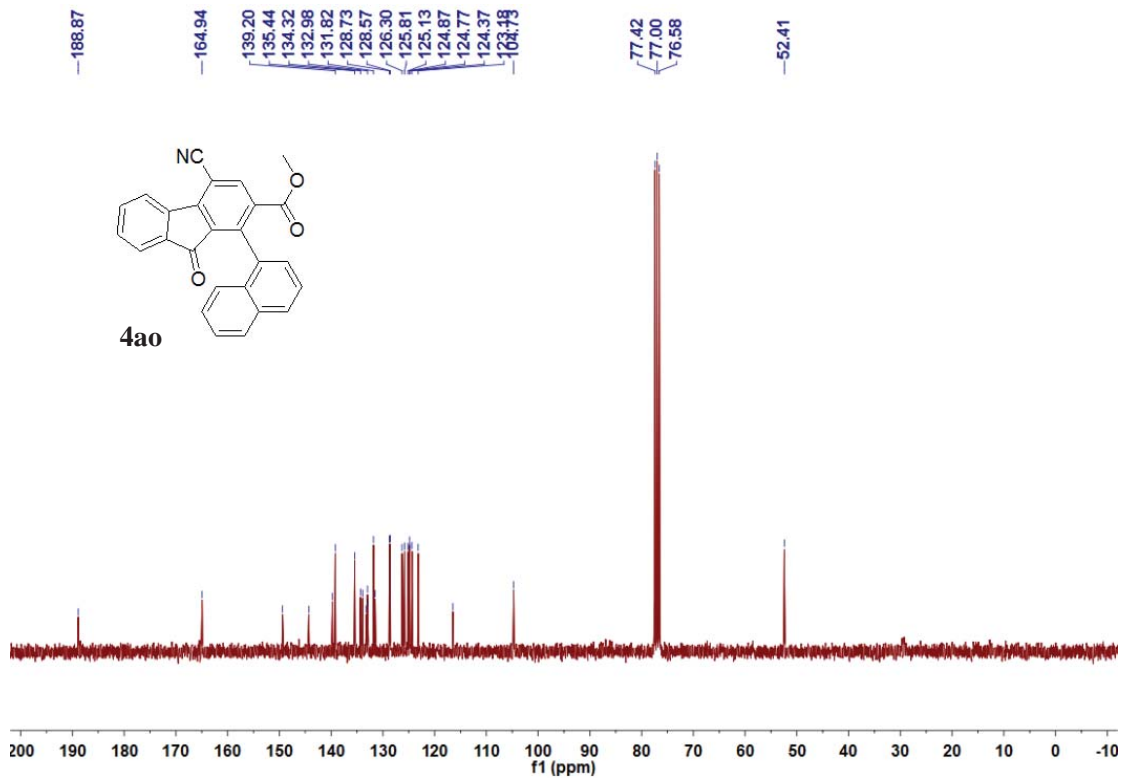

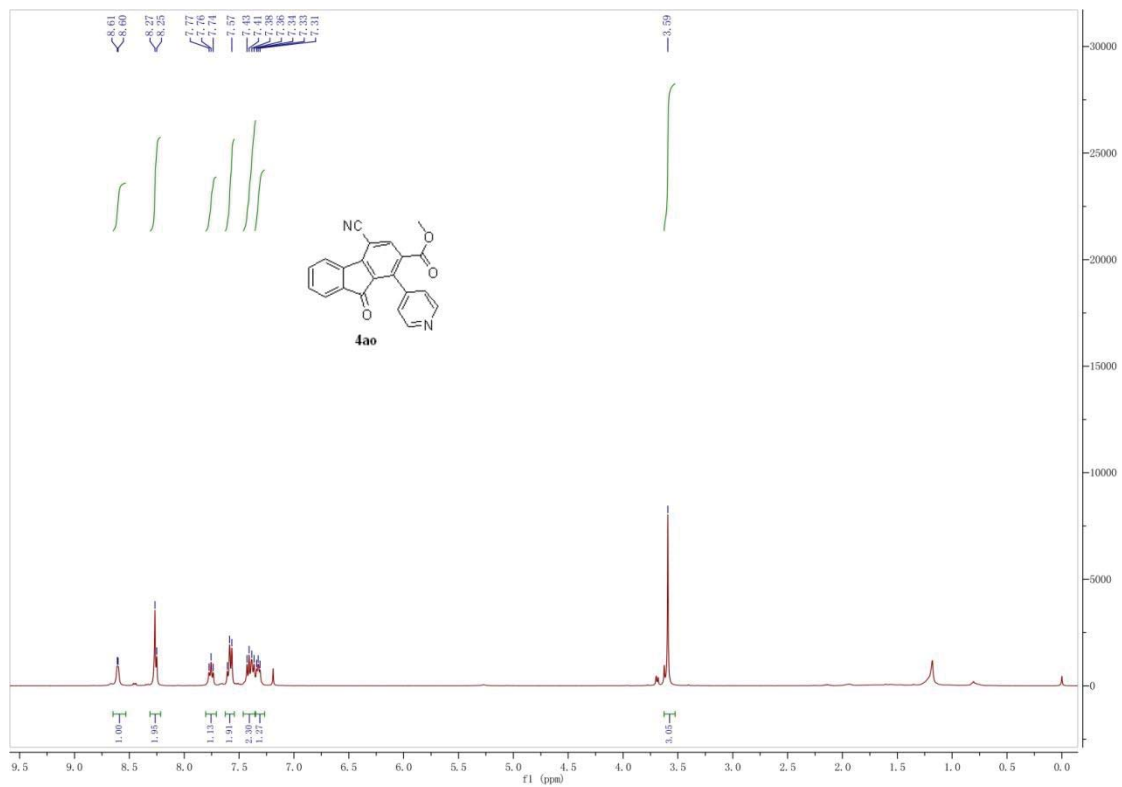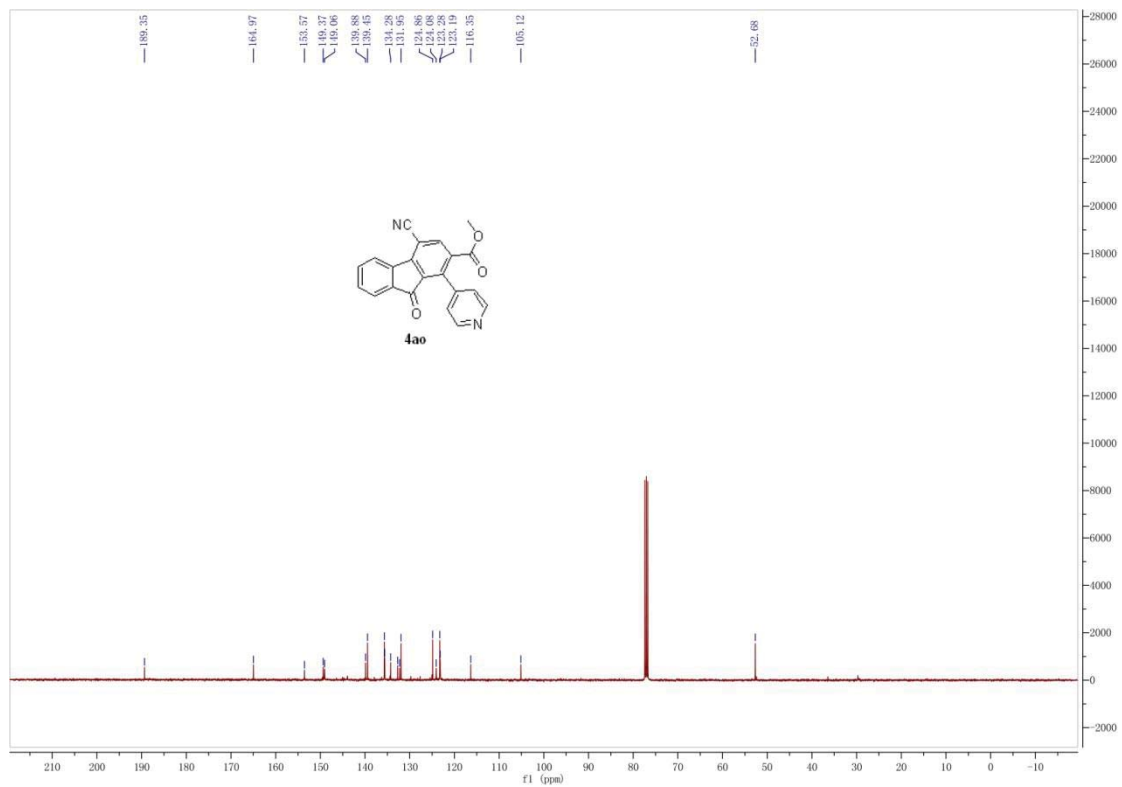

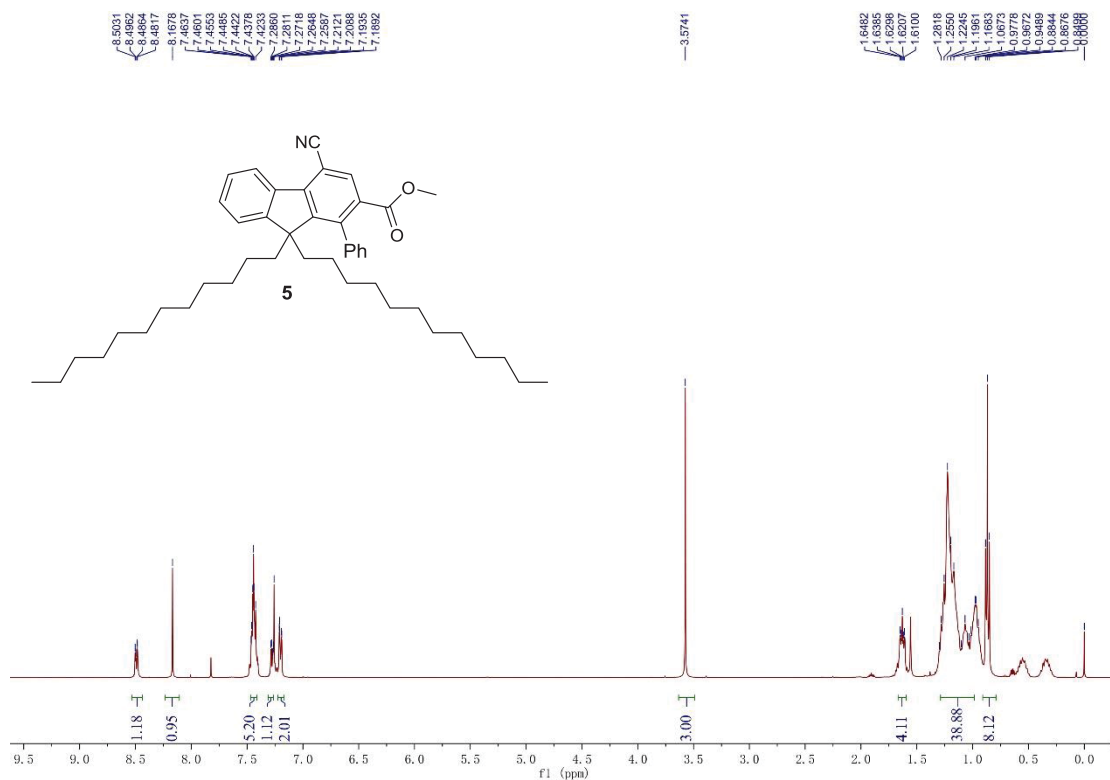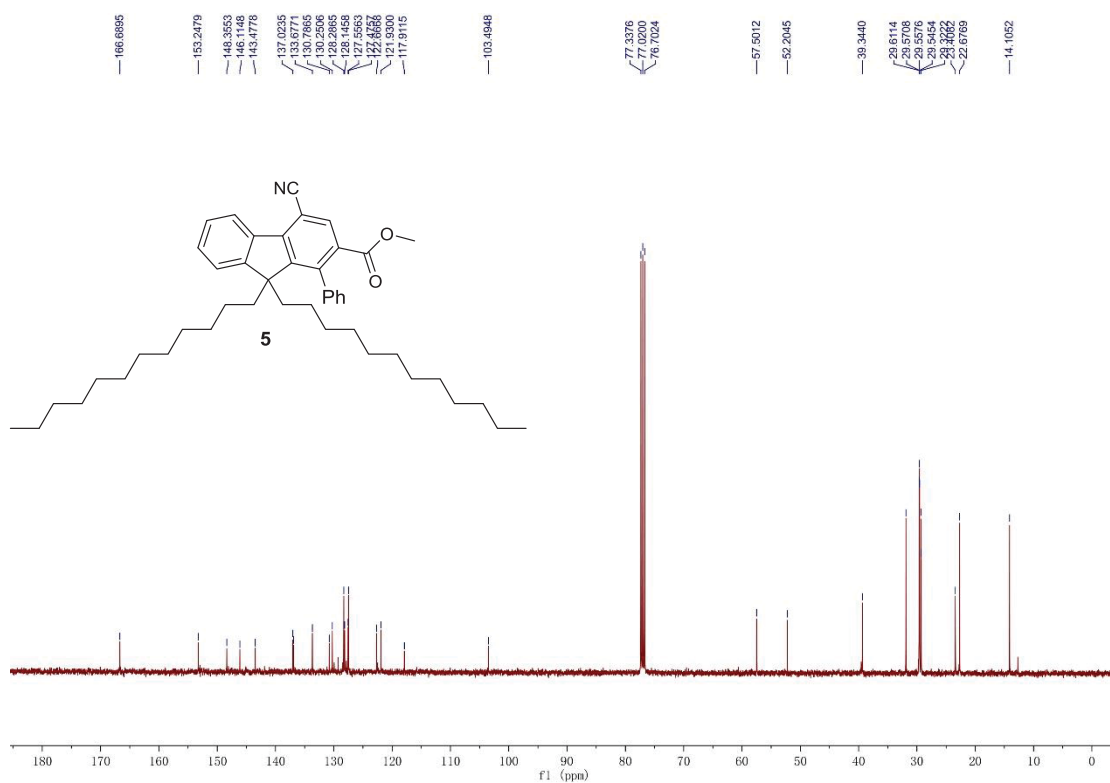

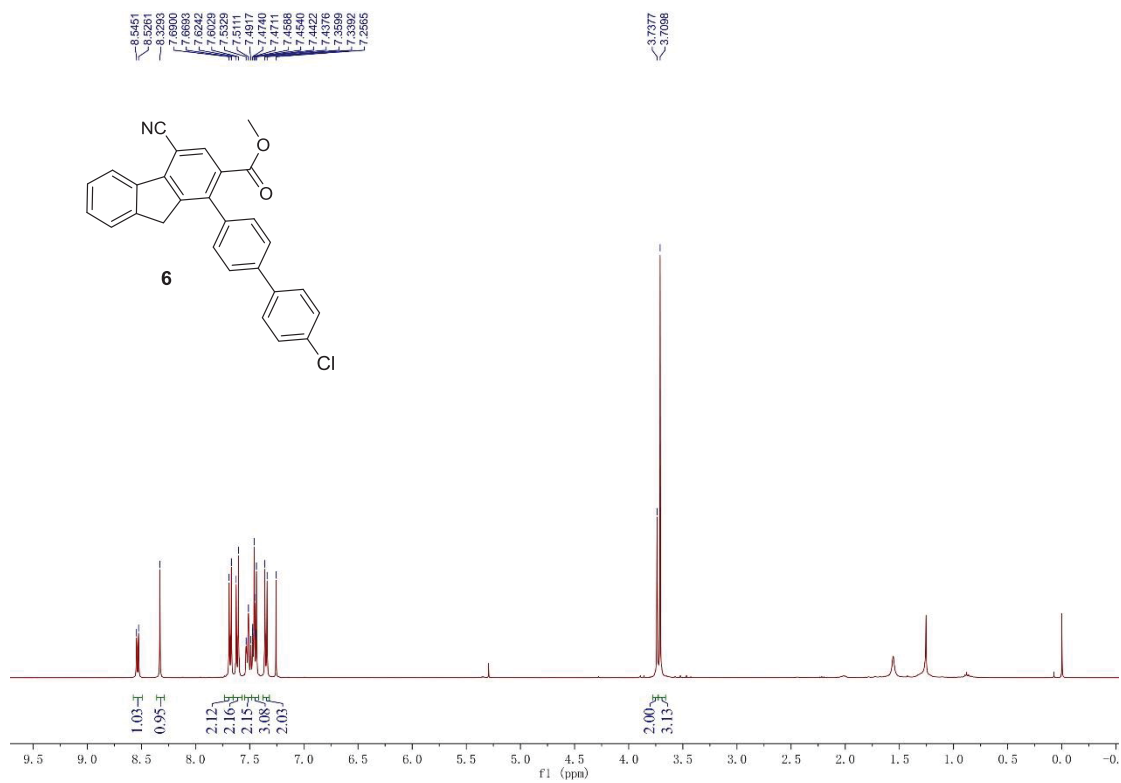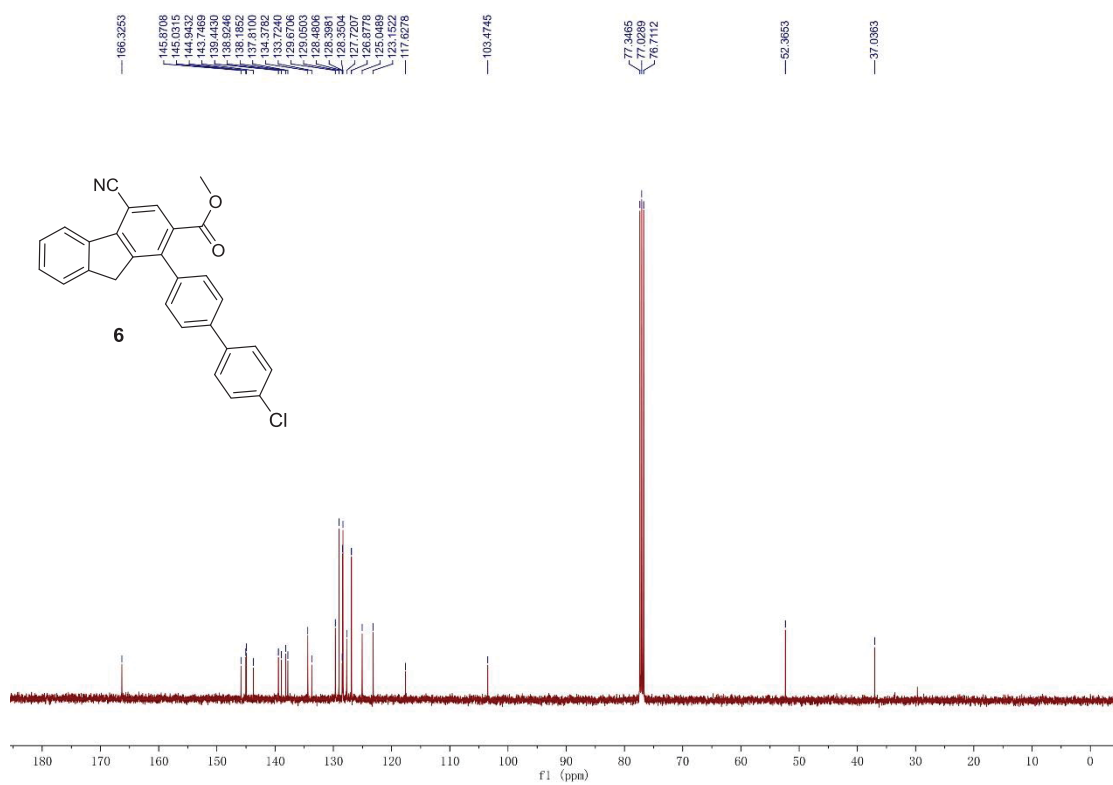

Supplement: d0cc00143k1.pdf [file d0cc00143k1.pdf]
